# Supplementary material for: Identification and characterization of opportunistic pathogen Pectobacterium polonicum causing potato blackleg in China
Source: Front Plant Sci. 2023 Mar 3;14:1097741. doi: 10.3389/fpls.2023.1097741 (PMC10020715; doi:10.3389/fpls.2023.1097741)
Supplement: Supplementary file 2 [file Table_1.xlsx]

## Sheet: genome comparison
Ortholog Group	BY21311	DPMP315T	Annotation
rhsC	BY21311_03319 BY21311_03311 BY21311_03304 BY21311_03316 BY21311_03313 BY21311_03307 BY21311_03308 BY21311_03315	DPMP315_01380 DPMP315_01382 DPMP315_01364 DPMP315_01371 DPMP315_01378 DPMP315_01374 DPMP315_01376	hypothetical protein
group_10	BY21311_00473 BY21311_02722 BY21311_02997	DPMP315_00998 DPMP315_02263	hypothetical protein
group_100	BY21311_00425	DPMP315_03982	type I-E CRISPR-associated protein Cse2/CasB [Pectobacterium]
group_101	BY21311_00465	DPMP315_04036	hypothetical protein
group_103	BY21311_00489	DPMP315_01014	M67 family metallopeptidase [Pectobacterium]
group_104	BY21311_00495	DPMP315_01023	RtcB family protein [Pectobacterium]
group_105	BY21311_00511	DPMP315_01037	Txe/YoeB family addiction module toxin [Pectobacterium]
group_1059	BY21311_03927	DPMP315_02421	elongation factor Tu [Pectobacterium]
group_106	BY21311_00521	DPMP315_01047	hypothetical protein
group_1060	BY21311_00111	DPMP315_01178	inner membrane protein YhjD [Pectobacterium]
group_1061	BY21311_03361	DPMP315_02120	glutamate 5-kinase [Pectobacterium]
group_1062	BY21311_03086	DPMP315_03465	alcohol dehydrogenase AdhP [Pectobacterium]
group_1063	BY21311_03943	DPMP315_02437	peptidylprolyl isomerase [Pectobacterium]
group_1064	BY21311_00874	DPMP315_00510	D-galactonate dehydratase family protein [Pectobacterium]
group_1065	BY21311_02697	DPMP315_02290	flagellar basal body rod protein FlgB [Pectobacterium]
group_1066	BY21311_02193	DPMP315_00895	OsmC family protein [Pectobacterium]
group_1067	BY21311_03716	DPMP315_02869	acetolactate synthase large subunit [Pectobacterium]
group_1068	BY21311_03385	DPMP315_02144	amino acid ABC transporter permease [Pectobacterium]
group_1069	BY21311_03006	DPMP315_03385	AMP-binding protein [Pectobacterium]
group_107	BY21311_00534	DPMP315_01062	YecA family protein [Pectobacterium]
group_1070	BY21311_04328	DPMP315_00635	ribosome-dependent GTPase TypA [Pectobacterium]
group_1071	BY21311_01887	DPMP315_02345	chromosome partition protein MukE [Pectobacterium]
group_1072	BY21311_02312	DPMP315_01868	methyl-accepting chemotaxis protein [Pectobacterium]
group_1073	BY21311_02494	DPMP315_02536	cytochrome c-type protein NapC [Pectobacterium]
group_1074	BY21311_00175	DPMP315_01117	DNA-binding transcriptional regulator CytR [Pectobacterium]
group_1075	BY21311_04146	DPMP315_04123	hypothetical protein
group_1076	BY21311_02079	DPMP315_01694	hemerythrin domain-containing protein [Pectobacterium]
group_1077	BY21311_01283	DPMP315_00296	outer membrane protein assembly factor BamC [Pectobacterium]
group_1078	BY21311_00410	DPMP315_03968	TRAP transporter large permease [Pectobacterium]
group_1079	BY21311_04091	DPMP315_04066	DNA helicase II [Pectobacterium]
group_108	BY21311_00536	DPMP315_01064	5-formyltetrahydrofolate cyclo-ligase [Pectobacterium]
group_1080	BY21311_01195	DPMP315_00208	trigger factor [Pectobacterium]
group_1081	BY21311_02886	DPMP315_03289	pyridoxal phosphate-dependent aminotransferase [Pectobacterium]
group_1082	BY21311_02684	DPMP315_02303	flagellar biosynthesis protein FliQ [Pectobacterium]
group_1083	BY21311_00031	DPMP315_01517	aliphatic sulfonate ABC transporter permease SsuC [Pectobacterium]
group_1084	BY21311_03204	DPMP315_02203	hypothetical protein [Pectobacterium]
group_1085	BY21311_01563	DPMP315_04281	AMP nucleosidase [Pectobacterium]
group_1086	BY21311_04046	DPMP315_01488	glucose-1-phosphate adenylyltransferase [Pectobacterium]
group_1087	BY21311_02581	DPMP315_01241	beta-ketoacyl-ACP synthase II [Pectobacterium]
group_1088	BY21311_01095	DPMP315_00107	UMP kinase [Pectobacterium]
group_1089	BY21311_01420	DPMP315_00433	molybdate ABC transporter substrate-binding protein [Pectobacterium]
group_109	BY21311_00549	DPMP315_01077	TonB-dependent receptor [Pectobacterium]
group_1090	BY21311_00131	DPMP315_01158	PLP-dependent aminotransferase family protein [Pectobacterium]
group_1091	BY21311_02384	DPMP315_01940	PTS sugar transporter subunit IIC [Pectobacterium]
group_1092	BY21311_03232	DPMP315_02230	YacC family pilotin-like protein [Pectobacterium]
group_1093	BY21311_03543	DPMP315_02702	bifunctional acyl-ACP--phospholipid O-acyltransferase/long-chain-fatty-acid--ACP ligase [Pectobacterium]
group_1094	BY21311_03527	DPMP315_00765	ribonuclease R [Pectobacterium]
group_1095	BY21311_03008	DPMP315_03387	hypothetical protein
group_1096	BY21311_03495	DPMP315_00794	methyl-accepting chemotaxis protein [Pectobacterium]
group_1097	BY21311_01944	DPMP315_00961	zinc ABC transporter permease subunit ZnuB [Pectobacterium]
group_1098	BY21311_02332	DPMP315_01888	MarR family transcriptional regulator [Pectobacterium]
group_1099	BY21311_02565	DPMP315_01226	NAD(P)/FAD-dependent oxidoreductase [Pectobacterium]
group_11	BY21311_00798 BY21311_01731	DPMP315_02605 DPMP315_03729 DPMP315_03741	integrase domain-containing protein [Pectobacterium]
group_110	BY21311_00554	DPMP315_01082	non-ribosomal peptide synthetase [Pectobacterium]
group_1100	BY21311_00862	DPMP315_00498	3,4-dihydroxy-2-butanone-4-phosphate synthase [Pectobacterium]
group_1101	BY21311_03284	DPMP315_01349	glutaredoxin 2 [Pectobacterium]
group_1102	BY21311_02501	DPMP315_02543	heme ABC transporter permease [Pectobacterium]
group_1103	BY21311_00376	DPMP315_03933	sel1 repeat family protein [Pectobacterium]
group_1104	BY21311_03605	DPMP315_02759	VWA domain-containing protein [Pectobacterium]
group_1105	BY21311_02093	DPMP315_01708	YnjH family protein [Pectobacterium]
group_1106	BY21311_03661	DPMP315_02815	pyruvate dehydrogenase complex transcriptional repressor PdhR [Pectobacterium]
group_1107	BY21311_01396	DPMP315_00409	peptidoglycan-associated lipoprotein Pal [Pectobacterium]
group_1108	BY21311_02756	DPMP315_03181	LysR family transcriptional regulator [Pectobacterium]
group_1109	BY21311_02304	DPMP315_01858	LysR family transcriptional regulator [Pectobacterium]
group_111	BY21311_00557	DPMP315_01085	amino acid adenylation domain-containing protein [Pectobacterium]
group_1110	BY21311_00430	DPMP315_03987	type I-E CRISPR-associated endoribonuclease Cas2e [Pectobacterium]
group_1111	BY21311_01641	DPMP315_02466	uridine diphosphate-N-acetylglucosamine-binding protein YvcK [Pectobacterium]
group_1112	BY21311_01698	DPMP315_03773	hypothetical protein [Pectobacterium]
group_1113	BY21311_04025	DPMP315_01466	LysE family translocator [Pectobacterium]
group_1114	BY21311_02397	DPMP315_01953	putrescine ABC transporter permease SapB [Pectobacterium]
group_1115	BY21311_01748	DPMP315_03713	bifunctional murein DD-endopeptidase/murein LD-carboxypeptidase [Pectobacterium]
group_1116	BY21311_01791	DPMP315_03669	YbjN domain-containing protein [Pectobacterium]
group_1117	BY21311_00279	DPMP315_03064	DNA-binding protein HU-alpha [Pectobacteriaceae]
group_1118	BY21311_00441	DPMP315_04003	aspartate carbamoyltransferase [Pectobacterium]
group_1119	BY21311_02109	DPMP315_01724	bifunctional acetaldehyde-CoA/alcohol dehydrogenase [Pectobacterium]
group_112	BY21311_00559	DPMP315_01087	putative Ig domain-containing protein [Pectobacterium]
group_1120	BY21311_02935	DPMP315_03338	hypothetical protein
group_1121	BY21311_01299	DPMP315_00312	hypothetical protein
group_1122	BY21311_00771	DPMP315_02627	AI-2E family transporter [Pectobacterium]
group_1123	BY21311_00812	DPMP315_02591	4-oxalocrotonate tautomerase family protein [Pectobacterium]
group_1124	BY21311_04213	DPMP315_00744	orotate phosphoribosyltransferase [Pectobacterium]
group_1125	BY21311_03611	DPMP315_02765	hypothetical protein [Pectobacterium]
group_1126	BY21311_03582	DPMP315_02737	secondary thiamine-phosphate synthase enzyme YjbQ [Pectobacterium]
group_1127	BY21311_02571	DPMP315_01232	purine nucleoside phosphoramidase [Pectobacterium]
group_1128	BY21311_01933	DPMP315_00950	hypothetical protein
group_1129	BY21311_03534	DPMP315_00758	YggT family protein [Pectobacterium]
group_113	BY21311_00560	DPMP315_01088	tail fiber protein [Pectobacterium]
group_1130	BY21311_00608	DPMP315_04437	YqjD family protein [Pectobacterium]
group_1131	BY21311_03251	DPMP315_01316	outer membrane protein assembly factor BamD [Pectobacterium]
group_1132	BY21311_03914	DPMP315_02408	50S ribosomal protein L29 [Pectobacterium]
group_1133	BY21311_00754	DPMP315_02646	hypothetical protein [Pectobacterium]
group_1134	BY21311_03759	DPMP315_02912	tRNA/rRNA methyltransferase [Pectobacterium]
group_1135	BY21311_03375	DPMP315_02134	S-methyl-5-thioribose kinase [Pectobacterium]
group_1136	BY21311_02211	DPMP315_00878	hypothetical protein
group_1137	BY21311_02422	DPMP315_01978	transketolase [Pectobacterium]
group_1138	BY21311_00040	DPMP315_01508	heat shock chaperone IbpA [Pectobacterium]
group_1139	BY21311_03982	DPMP315_01424	ribulose-phosphate 3-epimerase [Pectobacterium]
group_1140	BY21311_03809	DPMP315_02961	FtsH protease activity modulator HflK [Pectobacterium]
group_1141	BY21311_00523	DPMP315_01051	hypothetical protein [Pectobacterium]
group_1142	BY21311_01273	DPMP315_00286	phosphoribosylglycinamide formyltransferase [Pectobacterium]
group_1143	BY21311_02876	DPMP315_03279	NADH-quinone oxidoreductase subunit J [Pectobacterium]
group_1144	BY21311_02535	DPMP315_01197	3-deoxy-7-phosphoheptulonate synthase [Pectobacterium]
group_1145	BY21311_00320	DPMP315_03878	rod shape-determining protein MreC [Pectobacterium]
group_1146	BY21311_02674	DPMP315_02313	flagellar motor switch protein FliG [Pectobacterium]
rpmJ	BY21311_03902	DPMP315_02396	50S ribosomal protein L36
group_1148	BY21311_03514	DPMP315_00777	hypothetical protein
group_1149	BY21311_00519	DPMP315_01045	hypothetical protein
group_115	BY21311_00574	DPMP315_00555	type II toxin-antitoxin system antitoxin CcdA [Pectobacterium]
group_1150	BY21311_01250	DPMP315_00262	bifunctional 2-polyprenyl-6-hydroxyphenol methylase/3-demethylubiquinol 3-O-methyltransferase UbiG [Pectobacterium]
group_1151	BY21311_03889	DPMP315_02383	hypothetical protein
group_1152	BY21311_01913	DPMP315_00932	phosphatase [Pectobacterium]
group_1153	BY21311_03262	DPMP315_01327	30S ribosomal protein S16 [Pectobacterium]
group_1154	BY21311_02009	DPMP315_01625	translation initiation factor IF-3 [Pectobacterium]
group_1155	BY21311_01476	DPMP315_04193	MurR/RpiR family transcriptional regulator [Pectobacterium]
group_1156	BY21311_03934	DPMP315_02428	transcriptional regulator [Pectobacterium]
group_1157	BY21311_01746	DPMP315_03715	microcin C ABC transporter permease YejB [Pectobacterium]
rpmH	BY21311_04413	DPMP315_01551	50S ribosomal protein L34
group_1159	BY21311_01074	DPMP315_00086	cysteine desulfurase sulfur acceptor subunit CsdE [Pectobacterium]
group_116	BY21311_00583	DPMP315_04460	hypothetical protein
group_1160	BY21311_00821	DPMP315_02582	transaldolase [Pectobacterium]
group_1161	BY21311_02937	DPMP315_03340	malate dehydrogenase (quinone) [Pectobacterium]
group_1162	BY21311_03622	DPMP315_02776	D-threonate 4-phosphate dehydrogenase [Pectobacterium]
group_1163	BY21311_01689	DPMP315_03782	hypothetical protein
group_1164	BY21311_01764	DPMP315_03697	sugar ABC transporter ATP-binding protein [Pectobacterium]
group_1165	BY21311_03142	DPMP315_03520	serine hydroxymethyltransferase [Pectobacterium]
group_1166	BY21311_00094	DPMP315_03130	contact-dependent growth inhibition system immunity protein [Pectobacterium]
group_1167	BY21311_00303	DPMP315_03861	YhdT family protein [Pectobacterium]
group_1168	BY21311_03474	DPMP315_00815	hypothetical protein
group_1169	BY21311_02517	DPMP315_02559	transcriptional antiterminator BglG [Pectobacterium]
group_117	BY21311_00587	DPMP315_04456	protein-disulfide reductase DsbD [Pectobacterium]
group_1170	BY21311_00298	DPMP315_03856	DNA-binding transcriptional regulator Fis [Pectobacteriaceae]
group_1172	BY21311_01936	DPMP315_00953	YebC/PmpR family DNA-binding transcriptional regulator [Pectobacterium]
group_1173	BY21311_02010	DPMP315_01626	50S ribosomal protein L35 [Enterobacterales]
group_1174	BY21311_03150	DPMP315_03527	HAMP domain-containing histidine kinase [Pectobacterium]
group_1175	BY21311_01162	DPMP315_00175	branched-chain amino acid transport system II carrier protein [Pectobacterium]
group_1176	BY21311_04358	DPMP315_03018	FMN-binding protein MioC [Pectobacterium]
group_1177	BY21311_00749	DPMP315_02641	hypothetical protein [Pectobacterium]
group_1178	BY21311_01499	DPMP315_04217	hypothetical protein
group_1179	BY21311_01918	DPMP315_00937	ribosomal protein S5-alanine N-acetyltransferase [Pectobacterium]
group_118	BY21311_00588	DPMP315_04455	divalent cation tolerance protein CutA [Pectobacterium]
group_1180	BY21311_03173	DPMP315_02171	translation elongation factor 4 [Pectobacterium]
group_1181	BY21311_03810	DPMP315_02962	GTPase HflX [Pectobacterium]
group_1182	BY21311_01609	DPMP315_02497	lysozyme inhibitor LprI family protein [Pectobacterium]
group_1183	BY21311_02700	DPMP315_02287	flagellar export chaperone FlgN [Pectobacterium]
trpGD	BY21311_02130	DPMP315_01745	Bifunctional protein TrpGD
group_1185	BY21311_02728	DPMP315_02257	hypothetical protein
group_1186	BY21311_04369	DPMP315_03007	F0F1 ATP synthase subunit epsilon [Pectobacterium]
group_1187	BY21311_01831	DPMP315_03637	serine--tRNA ligase [Pectobacterium]
group_1188	BY21311_02549	DPMP315_01211	cupin domain-containing protein [Pectobacterium]
group_1189	BY21311_04114	DPMP315_04089	amino acid ABC transporter permease [Pectobacterium]
group_119	BY21311_00599	DPMP315_04446	diacylglycerol kinase [Pectobacterium]
group_1190	BY21311_04082	DPMP315_04057	homoserine/homoserine lactone efflux protein [Pectobacterium]
group_1191	BY21311_00545	DPMP315_01073	stress response protein [Pectobacterium]
group_1192	BY21311_02842	DPMP315_03245	uroporphyrinogen-III C-methyltransferase [Pectobacterium]
group_1193	BY21311_01309	DPMP315_00322	YpfN family protein [Pectobacterium]
group_1194	BY21311_04055	DPMP315_03218	hypothetical protein [Pectobacterium]
group_1195	BY21311_01743	DPMP315_03718	YejG family protein [Pectobacterium]
group_1196	BY21311_01875	DPMP315_02357	ABC transporter ATP-binding protein [Pectobacterium]
group_1197	BY21311_01536	DPMP315_04253	glutamate/aspartate:proton symporter GltP [Pectobacterium]
group_1198	BY21311_00260	DPMP315_03045	50S ribosomal protein L10 [Pectobacterium]
group_1199	BY21311_03073	DPMP315_03452	two-component system response regulator BaeR [Pectobacterium]
group_12	BY21311_00948 BY21311_00949	DPMP315_00585 DPMP315_00586 DPMP315_00584	phage tail protein [Pectobacterium]
group_120	BY21311_00610	DPMP315_04435	EnvZ/OmpR regulon moderator MzrA [Pectobacterium]
group_1200	BY21311_02030	DPMP315_01646	5-dehydro-4-deoxy-D-glucuronate isomerase [Pectobacterium]
group_1201	BY21311_04218	DPMP315_00739	glutathione ABC transporter substrate-binding protein [Pectobacterium]
group_1202	BY21311_03763	DPMP315_02916	2,3-diphosphoglycerate-dependent phosphoglycerate mutase GpmB [Pectobacterium]
cydX_1	BY21311_01389	DPMP315_00402	Cytochrome bd-I ubiquinol oxidase subunit X
group_1204	BY21311_01772	DPMP315_03689	GTP cyclohydrolase I FolE [Pectobacterium]
group_1205	BY21311_03050	DPMP315_03429	organic hydroperoxide resistance protein [Pectobacterium]
group_1206	BY21311_01276	DPMP315_00289	uracil permease [Pectobacterium]
group_1207	BY21311_02949	DPMP315_03352	ATP-dependent RNA helicase DbpA [Pectobacterium]
group_1208	BY21311_00107	DPMP315_01181	dicarboxylate/amino acid:cation symporter [Pectobacterium]
group_1209	BY21311_01174	DPMP315_00187	transcriptional regulator NrdR [Pectobacterium]
group_121	BY21311_00713	DPMP315_04337	ABC transporter ATP-binding protein [Pectobacterium]
group_1210	BY21311_01518	DPMP315_04236	hypothetical protein
group_1211	BY21311_04134	DPMP315_04109	UDP-N-acetylglucosamine--undecaprenyl-phosphate N-acetylglucosaminephosphotransferase [Pectobacterium]
group_1212	BY21311_00603	DPMP315_04442	LysR family transcriptional regulator [Pectobacterium]
group_1213	BY21311_01379	DPMP315_00392	succinate dehydrogenase cytochrome b556 subunit [Pectobacterium]
group_1214	BY21311_03925	DPMP315_02419	bacterioferritin [Pectobacterium]
group_1215	BY21311_01782	DPMP315_03679	ABC transporter permease [Pectobacterium]
group_1216	BY21311_04143	DPMP315_04120	ketol-acid reductoisomerase [Pectobacterium]
group_1217	BY21311_03729	DPMP315_02882	bis(5'-nucleosyl)-tetraphosphatase (symmetrical) ApaH [Pectobacterium]
group_1218	BY21311_01403	DPMP315_00416	nicotinamide riboside transporter PnuC [Pectobacterium]
group_1219	BY21311_02883	DPMP315_03286	NADH-quinone oxidoreductase subunit B [Pectobacterium]
group_122	BY21311_00717	DPMP315_04333	LacI family DNA-binding transcriptional regulator [Pectobacterium]
group_1220	BY21311_00399	DPMP315_03957	cell division protein FtsP [Pectobacterium]
group_1221	BY21311_01861	DPMP315_02371	fumarylacetoacetate hydrolase family protein [Pectobacterium]
group_1222	BY21311_03412	DPMP315_03198	NupC/NupG family nucleoside CNT transporter [Pectobacterium]
group_1223	BY21311_03221	DPMP315_02219	2-amino-4-hydroxy-6-hydroxymethyldihydropteridine diphosphokinase [Pectobacterium]
group_1224	BY21311_04339	DPMP315_00624	YihD family protein [Pectobacterium]
group_1225	BY21311_03003	DPMP315_03382	hypothetical protein
group_1226	BY21311_00642	DPMP315_04406	DNA primase [Pectobacterium]
group_1227	BY21311_02287	DPMP315_01841	membrane protein [Pectobacterium]
group_1228	BY21311_00122	DPMP315_01167	cell division ATP-binding protein FtsE [Pectobacterium]
group_1229	BY21311_03898	DPMP315_02392	DNA-directed RNA polymerase subunit alpha [Pectobacterium]
group_123	BY21311_00791	DPMP315_02607	Fic family protein [Pectobacterium]
group_1230	BY21311_01559	DPMP315_04276	methyl-accepting chemotaxis protein [Pectobacterium]
group_1231	BY21311_03387	DPMP315_02146	transporter substrate-binding domain-containing protein [Pectobacterium]
group_1232	BY21311_01206	DPMP315_00219	Lrp/AsnC family transcriptional regulator [Pectobacterium]
group_1233	BY21311_00210	DPMP315_03094	hypothetical protein [Pectobacterium]
group_1234	BY21311_01966	DPMP315_01582	hypothetical protein
group_1235	BY21311_04172	DPMP315_04148	tyrosine-protein phosphatase [Pectobacterium]
group_1236	BY21311_01885	DPMP315_02347	tRNA uridine 5-oxyacetic acid(34) methyltransferase CmoM [Pectobacterium]
group_1237	BY21311_02803	DPMP315_03208	ABC transporter permease [Pectobacterium]
group_1238	BY21311_00177	DPMP315_01115	50S ribosomal protein L31 [Pectobacterium]
group_1239	BY21311_02207	DPMP315_00882	fumarate/nitrate reduction transcriptional regulator Fnr [Pectobacterium]
group_124	BY21311_00793	DPMP315_02606	type II toxin-antitoxin system Phd/YefM family antitoxin [Pectobacterium]
group_1240	BY21311_01734	DPMP315_03726	YejL family protein [Pectobacterium]
group_1241	BY21311_01104	DPMP315_00115	UDP-3-O-(3-hydroxymyristoyl)glucosamine N-acyltransferase [Pectobacterium]
group_1242	BY21311_00673	DPMP315_04377	polyribonucleotide nucleotidyltransferase [Pectobacterium]
group_1243	BY21311_03946	DPMP315_02440	glutathione-regulated potassium-efflux system ancillary protein KefG [Pectobacterium]
group_1244	BY21311_00077	DPMP315_03145	zinc-binding alcohol dehydrogenase family protein [Pectobacterium]
group_1245	BY21311_03432	DPMP315_00858	protein-L-isoaspartate(D-aspartate) O-methyltransferase [Pectobacterium]
group_1246	BY21311_03948	DPMP315_02442	LysE family translocator [Pectobacterium]
group_1247	BY21311_03687	DPMP315_02841	phospho-N-acetylmuramoyl-pentapeptide-transferase [Pectobacterium]
group_1248	BY21311_02141	DPMP315_01756	HTH-type transcriptional regulator CysB [Pectobacterium]
group_1249	BY21311_01032	DPMP315_00047	oxidative damage protection protein [Pectobacterium]
group_125	BY21311_00837	DPMP315_00474	TonB-dependent receptor plug domain-containing protein [Pectobacterium]
group_1250	BY21311_00373	DPMP315_03930	plasmid stabilization protein [Pectobacterium]
group_1251	BY21311_04266	DPMP315_00695	methyl-accepting chemotaxis protein [Pectobacterium]
group_1252	BY21311_02096	DPMP315_01711	Hcp family type VI secretion system effector [Pectobacterium]
group_1253	BY21311_03860	DPMP315_02675	DMT family protein [Pectobacterium]
group_1254	BY21311_01220	DPMP315_00233	multidrug efflux transporter transcriptional repressor AcrR [Pectobacterium]
group_1255	BY21311_03497	DPMP315_00792	gamma-glutamylcyclotransferase [Pectobacterium]
group_1256	BY21311_01393	DPMP315_00406	colicin uptake protein TolR [Pectobacterium]
group_1257	BY21311_03733	DPMP315_02886	threonine/serine exporter ThrE family protein [Pectobacterium]
group_1258	BY21311_03546	DPMP315_02706	FCD domain-containing protein [Pectobacterium]
group_1259	BY21311_02440	DPMP315_01996	MliC family protein [Pectobacterium]
group_126	BY21311_00860	DPMP315_00496	ubiquinone biosynthesis accessory factor UbiK [Pectobacterium]
group_1260	BY21311_03896	DPMP315_02390	alternative ribosome-rescue factor A [Pectobacterium]
group_1261	BY21311_02060	DPMP315_01676	YcgL domain-containing protein [Pectobacterium]
group_1262	BY21311_00350	DPMP315_03908	UDP-N-acetylglucosamine 1-carboxyvinyltransferase [Pectobacterium]
group_1263	BY21311_03607	DPMP315_02761	VWA domain-containing protein [Pectobacterium]
group_1264	BY21311_04290	DPMP315_00672	thiol:disulfide interchange protein DsbG [Pectobacterium]
group_1265	BY21311_00230	DPMP315_03075	Sec-independent protein translocase subunit TatC [Pectobacterium]
group_1266	BY21311_04043	DPMP315_01485	NAD(P)H-dependent oxidoreductase [Pectobacterium]
group_1267	BY21311_02924	DPMP315_03327	endonuclease SmrB [Pectobacterium]
group_1268	BY21311_01959	DPMP315_00975	YebY family protein [Pectobacterium]
group_1269	BY21311_01755	DPMP315_03706	1-phosphofructokinase [Pectobacterium]
group_127	BY21311_00861	DPMP315_00497	hypothetical protein
group_1270	BY21311_01288	DPMP315_00301	metalloprotease TldD [Pectobacterium]
group_1271	BY21311_00342	DPMP315_03900	arabinose-5-phosphate isomerase KdsD [Pectobacterium]
group_1272	BY21311_02308	DPMP315_01864	ABC transporter permease [Pectobacterium]
group_1273	BY21311_00674	DPMP315_04376	lipoprotein NlpI [Pectobacterium]
group_1274	BY21311_00535	DPMP315_01063	cell division protein ZapA [Pectobacterium]
group_1275	BY21311_00362	DPMP315_03920	TIGR01212 family radical SAM protein [Pectobacterium]
group_1276	BY21311_01896	DPMP315_02336	hypothetical protein
group_1277	BY21311_04063	DPMP315_03226	DJ-1/PfpI family protein [Pectobacterium]
group_1278	BY21311_00089	DPMP315_03135	hypothetical protein [Pectobacterium]
group_1279	BY21311_01103	DPMP315_00114	molecular chaperone Skp [Pectobacterium]
group_128	BY21311_00897	DPMP315_00531	LysR family transcriptional regulator [Pectobacterium]
group_1280	BY21311_03755	DPMP315_02908	peroxide stress protein YaaA [Pectobacterium]
group_1281	BY21311_04225	DPMP315_00732	YicC family protein [Pectobacterium]
group_1282	BY21311_03566	DPMP315_02725	ATP-grasp domain-containing protein [Pectobacterium]
group_1283	BY21311_00211	DPMP315_03093	acetolactate synthase 2 catalytic subunit [Pectobacterium]
group_1284	BY21311_00009	DPMP315_01542	FadR family transcriptional regulator [Pectobacterium]
group_1285	BY21311_00275	DPMP315_03060	NAD(+) diphosphatase [Pectobacterium]
group_1286	BY21311_02105	DPMP315_01720	two-component system response regulator RssB [Pectobacterium]
group_1287	BY21311_03004	DPMP315_03383	methionine synthase [Pectobacterium]
group_1288	BY21311_00747	DPMP315_02639	type II and III secretion system protein family protein [Pectobacterium]
group_1289	BY21311_02884	DPMP315_03287	NADH-quinone oxidoreductase subunit A [Pectobacterium]
group_129	BY21311_00910	DPMP315_00543	hypothetical protein
group_1290	BY21311_01525	DPMP315_04243	iron transporter [Pectobacterium]
group_1291	BY21311_00651	DPMP315_04397	50S ribosomal protein L21 [Bacteria]
group_1292	BY21311_01860	DPMP315_02372	2-hydroxycarboxylate transporter family protein [Pectobacterium]
group_1293	BY21311_00477	DPMP315_01003	cupin domain-containing protein [Pectobacterium]
group_1294	BY21311_03032	DPMP315_03411	UDP-2,3-diacylglucosamine diphosphatase [Pectobacterium]
group_1295	BY21311_03968	DPMP315_01410	ABC transporter permease [Pectobacterium]
group_1296	BY21311_02519	DPMP315_02561	major outer membrane lipoprotein [Pectobacteriaceae]
group_1297	BY21311_04144	DPMP315_04121	HTH-type transcriptional activator IlvY [Pectobacterium]
group_1298	BY21311_02947	DPMP315_03350	hypothetical protein [Pectobacterium]
group_1299	BY21311_03885	DPMP315_02379	hypothetical protein
group_13	BY21311_01002 BY21311_02725 BY21311_02994	DPMP315_00011 DPMP315_02260	DNA repair protein RadC [Pectobacterium]
group_130	BY21311_00921	DPMP315_00559	ParA family protein [Pectobacterium]
group_1300	BY21311_03132	DPMP315_03510	inositol-1-monophosphatase [Pectobacterium]
group_1301	BY21311_03197	DPMP315_02196	sulfate ABC transporter permease subunit CysT [Pectobacterium]
group_1302	BY21311_02498	DPMP315_02540	heme lyase CcmF/NrfE family subunit [Pectobacterium]
group_1303	BY21311_02061	DPMP315_01677	fumarylacetoacetate hydrolase family protein [Pectobacterium]
group_1304	BY21311_00739	DPMP315_02631	kdo(2)-lipid IV(A) palmitoleoyltransferase [Pectobacterium]
group_1305	BY21311_02279	DPMP315_01833	type III secretion protein HrpT [Pectobacterium]
group_1306	BY21311_03693	DPMP315_02847	division/cell wall cluster transcriptional repressor MraZ [Pectobacterium]
group_1307	BY21311_03734	DPMP315_02887	LysE family translocator [Pectobacterium]
group_1308	BY21311_01394	DPMP315_00407	cell envelope integrity protein TolA [Pectobacterium]
group_1309	BY21311_03861	DPMP315_02676	hypothetical protein
group_131	BY21311_00922	DPMP315_00561	hypothetical protein [Pectobacterium]
group_1310	BY21311_02919	DPMP315_03322	elongation factor P hydroxylase [Pectobacterium]
group_1311	BY21311_02620	DPMP315_01278	sulfurtransferase TusE [Pectobacterium]
group_1312	BY21311_00374	DPMP315_03931	type II toxin-antitoxin system RelE/ParE family toxin [Pectobacterium]
group_1313	BY21311_00662	DPMP315_04386	preprotein translocase subunit SecG [Pectobacterium]
group_1314	BY21311_03782	DPMP315_02935	YhcH/YjgK/YiaL family protein [Pectobacterium]
group_1315	BY21311_01591	DPMP315_04309	helix-turn-helix domain-containing protein [Pectobacterium]
group_1316	BY21311_02539	DPMP315_01201	heme ABC transporter ATP-binding protein [Pectobacterium]
group_1317	BY21311_01898	DPMP315_02334	quinone-dependent dihydroorotate dehydrogenase [Pectobacterium]
group_1318	BY21311_02085	DPMP315_01700	glyceraldehyde-3-phosphate dehydrogenase [Pectobacterium]
group_1319	BY21311_00189	DPMP315_01103	LacI family DNA-binding transcriptional regulator [Pectobacterium]
group_132	BY21311_00929	DPMP315_00565	hypothetical protein
group_1320	BY21311_03062	DPMP315_03442	arabinogalactan endo-beta-1,4-galactanase [Pectobacterium]
group_1321	BY21311_03276	DPMP315_01341	recombinase RecA [Pectobacterium]
group_1322	BY21311_03772	DPMP315_02925	ribose-5-phosphate isomerase RpiA [Pectobacterium]
group_1323	BY21311_01042	DPMP315_00057	RNA pyrophosphohydrolase [Pectobacterium]
group_1324	BY21311_01199	DPMP315_00212	DNA-binding protein HU-beta [Pectobacteriaceae]
group_1325	BY21311_03811	DPMP315_02963	RNA chaperone Hfq [Pectobacterium]
group_1326	BY21311_03518	DPMP315_00773	30S ribosomal protein S6 [Pectobacteriaceae]
group_1327	BY21311_00612	DPMP315_04433	transcriptional regulator ExuR [Pectobacterium]
group_1328	BY21311_00179	DPMP315_01113	iron ABC transporter permease [Pectobacterium]
group_1329	BY21311_02556	DPMP315_01218	lipoprotein-releasing ABC transporter permease subunit LolC [Pectobacterium]
group_133	BY21311_00930	DPMP315_00566	hypothetical protein [Pectobacterium]
group_1330	BY21311_02209	DPMP315_00880	Re/Si-specific NAD(P)(+) transhydrogenase subunit beta [Pectobacterium]
group_1331	BY21311_03875	DPMP315_02692	1-acyl-sn-glycerol-3-phosphate acyltransferase [Pectobacterium]
group_1332	BY21311_03727	DPMP315_02880	16S rRNA (adenine(1518)-N(6)/adenine(1519)-N(6))-dimethyltransferase RsmA [Pectobacterium]
group_1333	BY21311_02011	DPMP315_01627	50S ribosomal protein L20 [Pectobacterium]
group_1334	BY21311_03473	DPMP315_00816	glycerate kinase [Pectobacterium]
group_1335	BY21311_00093	DPMP315_03131	hypothetical protein
group_1336	BY21311_03916	DPMP315_02410	30S ribosomal protein S3 [Enterobacterales]
group_1337	BY21311_04033	DPMP315_01474	DeoR/GlpR family transcriptional regulator [Pectobacterium]
group_1338	BY21311_00332	DPMP315_03890	nucleoside diphosphate kinase regulator [Pectobacterium]
group_1339	BY21311_01073	DPMP315_00085	tRNA cyclic N6-threonylcarbamoyladenosine(37) synthase TcdA [Pectobacterium]
group_134	BY21311_00933	DPMP315_00567	STY4528 family pathogenicity island replication protein [Pectobacterium]
group_1340	BY21311_02862	DPMP315_03265	heme anaerobic degradation radical SAM methyltransferase ChuW/HutW [Pectobacterium]
group_1341	BY21311_02956	DPMP315_03359	type II secretion system protein N [Pectobacterium]
group_1342	BY21311_04133	DPMP315_04108	ECA polysaccharide chain length modulation protein [Pectobacterium]
group_1343	BY21311_00806	DPMP315_02597	nucleotide exchange factor GrpE [Pectobacterium]
group_1344	BY21311_03609	DPMP315_02763	HpcH/HpaI aldolase/citrate lyase family protein [Pectobacterium]
group_1345	BY21311_04349	DPMP315_03027	D-ribose pyranase [Pectobacterium]
group_1346	BY21311_01173	DPMP315_00186	hypothetical protein
group_1347	BY21311_00758	DPMP315_02650	TolC family protein [Pectobacterium]
group_1348	BY21311_02569	DPMP315_01230	penicillin-binding protein activator LpoB [Pectobacterium]
group_1349	BY21311_03918	DPMP315_02412	30S ribosomal protein S19 [Bacteria]
group_135	BY21311_00935	DPMP315_00569	DNA topoisomerase III [Pectobacterium]
group_1350	BY21311_04029	DPMP315_01470	Fe-S biogenesis protein NfuA [Pectobacterium]
group_1351	BY21311_03051	DPMP315_03430	MarR family transcriptional regulator [Pectobacterium]
group_1352	BY21311_00487	DPMP315_01012	serine acetyltransferase [Pectobacterium]
group_1353	BY21311_03764	DPMP315_02917	inosine/xanthosine triphosphatase [Pectobacterium]
group_1354	BY21311_00684	DPMP315_04366	phosphopentomutase [Pectobacterium]
group_1355	BY21311_01099	DPMP315_00110	(2E,6E)-farnesyl-diphosphate-specific ditrans,polycis-undecaprenyl-diphosphate synthase [Pectobacterium]
group_1356	BY21311_02851	DPMP315_03254	cytochrome ubiquinol oxidase subunit I [Pectobacterium]
group_1357	BY21311_00205	DPMP315_03099	ABC transporter permease [Pectobacterium]
group_1358	BY21311_00261	DPMP315_03046	50S ribosomal protein L7/L12 [Pectobacterium]
group_1359	BY21311_00079	DPMP315_03143	MFS transporter [Pectobacterium]
group_136	BY21311_00936	DPMP315_00570	STY4534 family ICE replication protein [Pectobacterium]
group_1360	BY21311_03516	DPMP315_00775	30S ribosomal protein S18 [Enterobacterales]
group_1361	BY21311_04317	DPMP315_00645	guanylate kinase [Pectobacterium]
group_1362	BY21311_03278	DPMP315_01343	hypothetical protein [Pectobacterium]
group_1363	BY21311_00312	DPMP315_03870	acetyl-CoA carboxylase biotin carboxylase subunit [Pectobacterium]
group_1364	BY21311_03162	DPMP315_02160	type I secretion system permease/ATPase [Pectobacterium]
group_1365	BY21311_01474	DPMP315_04191	extracellular solute-binding protein [Pectobacterium]
group_1366	BY21311_01766	DPMP315_03695	KTSC domain-containing protein [Pectobacterium]
group_1367	BY21311_01178	DPMP315_00191	thiamine-phosphate kinase [Pectobacterium]
group_1368	BY21311_03913	DPMP315_02407	30S ribosomal protein S17 [Pectobacterium]
group_1369	BY21311_01262	DPMP315_00274	YfaZ family outer membrane protein [Pectobacterium]
group_137	BY21311_00938	DPMP315_00574	TcpQ domain-containing protein [Pectobacterium]
group_1370	BY21311_00198	DPMP315_01094	glutamate racemase [Pectobacterium]
group_1371	BY21311_03250	DPMP315_01315	23S rRNA pseudouridine(1911/1915/1917) synthase RluD [Pectobacterium]
group_1372	BY21311_01076	DPMP315_00088	YgdI/YgdR family lipoprotein [Pectobacterium]
group_1373	BY21311_00621	DPMP315_04424	23S rRNA (guanine(1835)-N(2))-methyltransferase RlmG [Pectobacterium]
group_1374	BY21311_01514	DPMP315_04232	MASE1 domain-containing protein [Pectobacterium]
group_1375	BY21311_03242	DPMP315_02240	class I SAM-dependent methyltransferase [Pectobacterium]
group_1376	BY21311_03746	DPMP315_02899	transcriptional activator NhaR [Pectobacterium]
group_1377	BY21311_02077	DPMP315_01692	D-amino acid dehydrogenase [Pectobacterium]
group_1378	BY21311_04335	DPMP315_00628	ribosome biogenesis GTP-binding protein YihA/YsxC [Pectobacterium]
group_1379	BY21311_01809	DPMP315_03657	heavy metal-binding domain-containing protein [Pectobacterium]
group_138	BY21311_00946	DPMP315_00582	lytic transglycosylase domain-containing protein [Pectobacterium]
group_1380	BY21311_02342	DPMP315_01898	hypothetical protein
group_1381	BY21311_00452	DPMP315_04013	RidA family protein [Pectobacterium]
group_1382	BY21311_02489	DPMP315_02531	chaperone NapD [Pectobacterium]
group_1383	BY21311_02553	DPMP315_01215	N-acetylglucosamine kinase [Pectobacterium]
group_1384	BY21311_01375	DPMP315_00388	5-oxoprolinase subunit PxpA [Pectobacterium]
group_1385	BY21311_04018	DPMP315_01459	CpmJ protein [Pectobacterium]
group_1386	BY21311_03273	DPMP315_01338	carbon storage regulator CsrA [Enterobacterales]
group_1387	BY21311_01790	DPMP315_03670	30S ribosomal protein S6--L-glutamate ligase [Pectobacterium]
group_1388	BY21311_02350	DPMP315_01906	YceI family protein [Pectobacterium]
group_1389	BY21311_02699	DPMP315_02288	anti-sigma-28 factor FlgM [Pectobacterium]
group_139	BY21311_00950	DPMP315_00587	site-specific integrase [Pectobacterium]
group_1390	BY21311_01534	DPMP315_04251	HTH-type transcriptional regulator Cbl [Pectobacterium]
group_1391	BY21311_02970	DPMP315_03373	type II secretion system assembly factor GspB [Pectobacterium]
group_1392	BY21311_04016	DPMP315_01457	5-dehydro-4-deoxy-D-glucuronate isomerase [Pectobacterium]
group_1393	BY21311_03933	DPMP315_02427	sulfurtransferase complex subunit TusD [Pectobacterium]
group_1394	BY21311_02122	DPMP315_01737	acyl-CoA thioester hydrolase YciA [Pectobacterium]
group_1395	BY21311_01331	DPMP315_00344	zinc ribbon-containing protein [Pectobacterium]
group_1396	BY21311_01759	DPMP315_03702	LysR family transcriptional regulator [Pectobacterium]
group_1397	BY21311_02399	DPMP315_01955	peptide ABC transporter ATP-binding protein SapD [Pectobacterium]
group_1398	BY21311_01251	DPMP315_00263	DNA topoisomerase (ATP-hydrolyzing) subunit A [Pectobacterium]
group_1399	BY21311_04371	DPMP315_03005	bifunctional UDP-N-acetylglucosamine diphosphorylase/glucosamine-1-phosphate N-acetyltransferase GlmU [Pectobacterium]
group_14	BY21311_00464 BY21311_02736	DPMP315_04037 DPMP315_02247	hypothetical protein
group_140	BY21311_00952	DPMP315_00594	TIGR03759 family integrating conjugative element protein [Pectobacterium]
group_1400	BY21311_03513	DPMP315_00778	Opacity-associated protein A [Pectobacterium]
group_1401	BY21311_04234	DPMP315_00727	hypothetical protein [Pectobacterium]
group_1402	BY21311_01274	DPMP315_00287	phosphoribosylformylglycinamidine cyclo-ligase [Pectobacterium]
group_1403	BY21311_03748	DPMP315_02901	molecular chaperone DnaJ [Pectobacterium]
group_1404	BY21311_01078	DPMP315_00090	hypothetical protein
group_1405	BY21311_01582	DPMP315_04300	LuxR family transcriptional regulator [Pectobacterium]
group_1406	BY21311_00803	DPMP315_02600	outer membrane protein assembly factor BamE [Pectobacterium]
group_1407	BY21311_04136	DPMP315_04111	thioredoxin TrxA [Pectobacterium]
group_1408	BY21311_02210	DPMP315_00879	Re/Si-specific NAD(P)(+) transhydrogenase subunit alpha [Pectobacterium]
group_1409	BY21311_01176	DPMP315_00189	6,7-dimethyl-8-ribityllumazine synthase [Pectobacterium]
group_141	BY21311_00953	DPMP315_00595	transglycosylase SLT domain-containing protein [Pectobacterium]
group_1410	BY21311_00098	DPMP315_01190	cellulose synthase complex periplasmic endoglucanase BcsZ [Pectobacterium]
group_1411	BY21311_00405	DPMP315_03963	AraC family transcriptional regulator [Pectobacterium]
group_1412	BY21311_04038	DPMP315_01479	MFS transporter [Pectobacterium]
group_1413	BY21311_02900	DPMP315_03303	histidine ABC transporter ATP-binding protein HisP [Pectobacterium]
group_1414	BY21311_04090	DPMP315_04065	cyclase family protein [Pectobacterium]
group_1415	BY21311_00537	DPMP315_01065	multifunctional transcriptional regulator/nicotinamide-nucleotide adenylyltransferase/ribosylnicotinamide kinase NadR [Pectobacterium]
group_1416	BY21311_01718	DPMP315_03753	glutamine ABC transporter substrate-binding protein GlnH [Pectobacterium]
group_1417	BY21311_02187	DPMP315_00901	hypothetical protein
group_1418	BY21311_02260	DPMP315_01814	GntR family transcriptional regulator [Pectobacterium]
group_1419	BY21311_01284	DPMP315_00297	phosphoribosylaminoimidazolesuccinocarboxamide synthase [Pectobacterium]
group_142	BY21311_00957	DPMP315_00599	TIGR03747 family integrating conjugative element membrane protein [Pectobacterium]
group_1420	BY21311_00411	DPMP315_03969	TRAP transporter small permease [Pectobacterium]
group_1421	BY21311_00726	DPMP315_04324	hypothetical protein
group_1422	BY21311_00917	DPMP315_00551	GNAT family N-acetyltransferase [Pectobacterium]
group_1423	BY21311_01088	DPMP315_00100	flavodoxin [Pectobacterium]
group_1424	BY21311_02493	DPMP315_02535	nitrate reductase cytochrome c-type subunit [Pectobacterium]
group_1425	BY21311_03698	DPMP315_02852	acetolactate synthase 3 large subunit [Pectobacterium]
group_1426	BY21311_03641	DPMP315_02794	substrate-binding domain-containing protein [Pectobacterium]
group_1427	BY21311_00592	DPMP315_04451	co-chaperone GroES [Pectobacterium]
group_1428	BY21311_04159	DPMP315_04135	6-phosphofructokinase [Pectobacterium]
group_1429	BY21311_04365	DPMP315_03011	F0F1 ATP synthase subunit delta [Pectobacterium]
group_143	BY21311_00959	DPMP315_00602	hypothetical protein [Pectobacterium]
group_1430	BY21311_01685	DPMP315_03786	hypothetical protein
group_1431	BY21311_03408	DPMP315_03202	L-valine transporter subunit YgaH [Pectobacterium]
group_1432	BY21311_02526	DPMP315_02568	Fe-S cluster assembly scaffold SufA [Pectobacterium]
group_1433	BY21311_01964	DPMP315_01580	RNA chaperone/antiterminator CspA [Pectobacterium]
group_1434	BY21311_01297	DPMP315_00310	hypothetical protein [Pectobacterium]
group_1435	BY21311_03420	DPMP315_03190	MFS transporter [Pectobacterium]
group_1436	BY21311_01340	DPMP315_00353	tRNA (N6-isopentenyl adenosine(37)-C2)-methylthiotransferase MiaB [Pectobacterium]
group_1437	BY21311_00277	DPMP315_03062	deoxyribonuclease V [Pectobacterium]
group_1438	BY21311_02107	DPMP315_01722	DNA-binding transcriptional regulator H-NS [Pectobacterium]
group_1439	BY21311_03944	DPMP315_02438	YheV family putative metal-binding protein [Pectobacterium]
group_144	BY21311_00961	DPMP315_00604	TIGR03745 family integrating conjugative element membrane protein [Pectobacterium]
group_1440	BY21311_00745	DPMP315_02637	prepilin peptidase [Pectobacterium]
group_1441	BY21311_04168	DPMP315_04144	phosphoenolpyruvate carboxylase [Pectobacterium]
group_1442	BY21311_01106	DPMP315_00117	acyl-ACP--UDP-N-acetylglucosamine O-acyltransferase [Pectobacterium]
group_1443	BY21311_04068	DPMP315_04044	PTS system mannose/fructose/sorbose family transporter subunit IID [Pectobacterium]
group_1444	BY21311_02945	DPMP315_03348	hypothetical protein [Pectobacterium]
group_1445	BY21311_00992	DPMP315_00032	DMT family transporter [Pectobacterium]
group_1446	BY21311_00517	DPMP315_01043	YagU family protein [Pectobacterium]
group_1447	BY21311_02298	DPMP315_01852	hypothetical protein
group_1448	BY21311_01385	DPMP315_00398	ADP-forming succinate--CoA ligase subunit beta [Pectobacterium]
group_1449	BY21311_03195	DPMP315_02194	sulfate ABC transporter ATP-binding protein [Pectobacterium]
group_145	BY21311_00964	DPMP315_00607	TIGR03749 family integrating conjugative element protein [Pectobacterium]
group_1450	BY21311_00780	DPMP315_02618	hypothetical protein [Pectobacterium]
group_1451	BY21311_03283	DPMP315_01348	LysR family transcriptional regulator [Pectobacterium]
group_1452	BY21311_02500	DPMP315_02542	heme exporter protein CcmD [Pectobacterium]
group_1453	BY21311_02528	DPMP315_02570	hotdog fold thioesterase [Pectobacterium]
group_1454	BY21311_01652	DPMP315_03819	hypothetical protein
group_1455	BY21311_01188	DPMP315_00201	cytochrome o ubiquinol oxidase subunit IV [Pectobacterium]
group_1456	BY21311_02717	DPMP315_02270	protein DsrB [Pectobacterium]
group_1457	BY21311_01943	DPMP315_00960	LacI family transcriptional regulator [Pectobacterium]
group_1458	BY21311_04059	DPMP315_03222	gluconokinase [Pectobacterium]
group_1459	BY21311_01305	DPMP315_00318	hypothetical protein [Pectobacterium]
group_146	BY21311_00965	DPMP315_00608	TIGR03752 family integrating conjugative element protein [Pectobacterium]
group_1460	BY21311_02383	DPMP315_01939	PTS lactose/cellobiose transporter subunit IIA [Pectobacterium]
group_1461	BY21311_00130	DPMP315_01159	high-affinity branched-chain amino acid ABC transporter ATP-binding protein LivF [Pectobacterium]
group_1462	BY21311_00700	DPMP315_04350	hypothetical protein
group_1463	BY21311_01212	DPMP315_00225	YbaY family lipoprotein [Pectobacterium]
group_1464	BY21311_00728	DPMP315_04322	bifunctional protein-disulfide isomerase/oxidoreductase DsbC [Pectobacterium]
group_1465	BY21311_03341	DPMP315_01403	type VI secretion system baseplate subunit TssE [Pectobacterium]
group_1466	BY21311_02087	DPMP315_01702	YeaC family protein [Pectobacterium]
group_1467	BY21311_02580	DPMP315_01240	aminodeoxychorismate lyase [Pectobacterium]
group_1468	BY21311_02436	DPMP315_01992	glutathione transferase GstA [Pectobacterium]
group_1469	BY21311_01235	DPMP315_00247	carbon starvation protein A [Pectobacterium]
group_147	BY21311_00968	DPMP315_00610	TIGR03751 family conjugal transfer lipoprotein [Pectobacterium]
group_1470	BY21311_00472	DPMP315_00997	hypothetical protein
group_1471	BY21311_03037	DPMP315_03416	helix-turn-helix domain-containing protein [Pectobacterium]
group_1472	BY21311_03857	DPMP315_02672	fumarate reductase subunit FrdC [Pectobacterium]
group_1473	BY21311_04275	DPMP315_00687	sulfite exporter TauE/SafE family protein [Pectobacterium]
group_1474	BY21311_00246	DPMP315_03542	menaquinone-dependent protoporphyrinogen IX dehydrogenase [Pectobacterium]
group_1475	BY21311_00742	DPMP315_02634	response regulator transcription factor [Pectobacterium]
group_1476	BY21311_01355	DPMP315_00368	ferric iron uptake transcriptional regulator [Pectobacterium]
group_1477	BY21311_03910	DPMP315_02404	50S ribosomal protein L5 [Pectobacteriaceae]
group_1478	BY21311_03092	DPMP315_03471	GNAT family N-acetyltransferase [Pectobacterium]
group_1479	BY21311_00826	DPMP315_02577	4-hydroxythreonine-4-phosphate dehydrogenase PdxA [Pectobacterium]
group_148	BY21311_00969	DPMP315_00611	conjugative transfer ATPase [Pectobacterium]
group_1480	BY21311_01682	DPMP315_03789	aspartate aminotransferase family protein [Pectobacterium]
group_1481	BY21311_01511	DPMP315_04229	iron ABC transporter permease [Pectobacterium]
group_1482	BY21311_02370	DPMP315_01926	2-hydroxyacid dehydrogenase [Pectobacterium]
group_1483	BY21311_04362	DPMP315_03014	F0F1 ATP synthase subunit A [Pectobacterium]
group_1484	BY21311_00845	DPMP315_00481	sulfate/thiosulfate ABC transporter permease CysW [Pectobacterium]
group_1485	BY21311_02542	DPMP315_01204	hypothetical protein [Pectobacterium]
group_1486	BY21311_02892	DPMP315_03295	acetate kinase [Pectobacterium]
group_1487	BY21311_04089	DPMP315_04064	magnesium/cobalt transporter CorA [Pectobacterium]
group_1488	BY21311_01793	DPMP315_03667	putrescine ABC transporter ATP-binding subunit PotG [Pectobacterium]
group_1489	BY21311_02353	DPMP315_01909	two-component system sensor histidine kinase RstB [Pectobacterium]
group_149	BY21311_00977	DPMP315_00615	TIGR03756 family integrating conjugative element protein [Pectobacterium]
group_1490	BY21311_00225	DPMP315_03079	SCP2 domain-containing protein [Pectobacterium]
group_1491	BY21311_02057	DPMP315_01673	cell division topological specificity factor MinE [Pectobacteriaceae]
group_1492	BY21311_04211	DPMP315_00746	dUTP diphosphatase [Pectobacterium]
group_1493	BY21311_02550	DPMP315_01212	Crp/Fnr family transcriptional regulator [Pectobacterium]
group_1494	BY21311_03458	DPMP315_00832	SDR family oxidoreductase [Pectobacterium]
group_1495	BY21311_02416	DPMP315_01972	lipopolysaccharide assembly protein LapB [Pectobacterium]
group_1496	BY21311_04374	DPMP315_03002	phosphate ABC transporter substrate-binding protein PstS [Pectobacterium]
group_1497	BY21311_03510	DPMP315_00781	iron-sulfur cluster repair protein YtfE [Pectobacterium]
group_1498	BY21311_02599	DPMP315_01259	YceI family protein [Pectobacterium]
group_1499	BY21311_01838	DPMP315_03630	formate C-acetyltransferase [Pectobacterium]
group_150	BY21311_00978	DPMP315_00616	integrating conjugative element protein [Pectobacterium]
group_1500	BY21311_01058	DPMP315_00070	L-talarate/galactarate dehydratase [Pectobacterium]
group_1501	BY21311_01531	DPMP315_04248	TlpA family protein disulfide reductase [Pectobacterium]
group_1502	BY21311_00667	DPMP315_04382	transcription termination factor NusA [Pectobacterium]
group_1503	BY21311_03930	DPMP315_02424	30S ribosomal protein S12 [Pectobacteriaceae]
group_1504	BY21311_01614	DPMP315_02493	YqaE/Pmp3 family membrane protein [Pectobacterium]
group_1505	BY21311_01816	DPMP315_03650	cold shock-like protein CspD [Pectobacterium]
group_1506	BY21311_00800	DPMP315_02603	SsrA-binding protein SmpB [Pectobacterium]
group_1507	BY21311_02213	DPMP315_00876	invasion regulator SirB1 [Pectobacterium]
group_1508	BY21311_03049	DPMP315_03428	hypothetical protein
group_1509	BY21311_00291	DPMP315_03849	amino acid ABC transporter substrate-binding protein [Pectobacterium]
group_151	BY21311_00999	DPMP315_00005	hypothetical protein [Pectobacterium]
group_1510	BY21311_01382	DPMP315_00395	succinate dehydrogenase iron-sulfur subunit [Pectobacterium]
group_1511	BY21311_03707	DPMP315_02861	methyl-accepting chemotaxis protein [Pectobacterium]
group_1512	BY21311_02438	DPMP315_01994	tyrosine--tRNA ligase [Pectobacterium]
group_1513	BY21311_03794	DPMP315_02946	M48 family metallopeptidase [Pectobacterium]
group_1514	BY21311_02942	DPMP315_03345	lysozyme inhibitor LprI family protein [Pectobacterium]
group_1515	BY21311_03124	DPMP315_03502	ISC system 2Fe-2S type ferredoxin [Pectobacterium]
group_1516	BY21311_04397	DPMP315_01567	hypothetical protein
group_1517	BY21311_00649	DPMP315_04399	putative DNA-binding transcriptional regulator [Pectobacterium]
group_1518	BY21311_02867	DPMP315_03270	GNAT family N-acetyltransferase [Pectobacterium]
group_1519	BY21311_03644	DPMP315_02797	PTS sugar transporter subunit IIA [Pectobacterium]
group_152	BY21311_01003	DPMP315_00012	hypothetical protein [Pectobacterium]
group_1520	BY21311_02680	DPMP315_02307	flagellar motor switch protein FliM [Pectobacterium]
group_1521	BY21311_02903	DPMP315_03306	lysine/arginine/ornithine ABC transporter substrate-binding protein [Pectobacterium]
group_1522	BY21311_01789	DPMP315_03671	oxygen-insensitive NADPH nitroreductase [Pectobacterium]
group_1523	BY21311_00853	DPMP315_00490	phosphocarrier protein Hpr [Pectobacterium]
group_1524	BY21311_03722	DPMP315_02875	bifunctional tRNA pseudouridine(32) synthase/23S rRNA pseudouridine(746) synthase RluA [Pectobacterium]
group_1525	BY21311_02345	DPMP315_01901	sodium-potassium/proton antiporter ChaA [Pectobacterium]
group_1526	BY21311_00455	DPMP315_04016	leucyl aminopeptidase [Pectobacterium]
group_1527	BY21311_00414	DPMP315_03972	TonB system transport protein ExbD [Pectobacterium]
group_1528	BY21311_03419	DPMP315_03191	YfiM family lipoprotein [Pectobacterium]
group_1529	BY21311_04332	DPMP315_00631	hypothetical protein
group_153	BY21311_01005	DPMP315_00015	hypothetical protein [Pectobacterium]
group_1530	BY21311_03998	DPMP315_01439	Hsp33 family molecular chaperone HslO [Pectobacterium]
group_1531	BY21311_02326	DPMP315_01882	hypothetical protein [Pectobacterium]
group_1532	BY21311_01890	DPMP315_02342	YcbK family protein [Pectobacterium]
group_1533	BY21311_03363	DPMP315_02122	5-carboxymethyl-2-hydroxymuconate Delta-isomerase [Pectobacterium]
group_1534	BY21311_01905	DPMP315_02327	membrane integrity-associated transporter subunit PqiC [Pectobacterium]
group_1535	BY21311_02600	DPMP315_01260	rhodanese-related sulfurtransferase [Pectobacterium]
group_1536	BY21311_02148	DPMP315_01763	electron transport complex subunit RsxB [Pectobacterium]
group_1537	BY21311_02191	DPMP315_00897	TetR family transcriptional regulator [Pectobacterium]
group_1538	BY21311_01139	DPMP315_00153	HlyD family type I secretion periplasmic adaptor subunit [Pectobacterium]
group_1539	BY21311_03423	DPMP315_00867	D-glycero-beta-D-manno-heptose 1,7-bisphosphate 7-phosphatase [Pectobacterium]
group_154	BY21311_01006	DPMP315_00016	ArdC-like ssDNA-binding domain-containing protein [Pectobacterium]
group_1540	BY21311_04179	DPMP315_04155	carboxylate/amino acid/amine transporter [Pectobacterium]
group_1541	BY21311_02046	DPMP315_01662	TerC family protein [Pectobacterium]
group_1542	BY21311_01201	DPMP315_00214	helix-hairpin-helix domain-containing protein [Pectobacterium]
group_1543	BY21311_01039	DPMP315_00054	YgdI/YgdR family lipoprotein [Pectobacterium]
group_1544	BY21311_01859	DPMP315_02373	sensor histidine kinase [Pectobacterium]
group_1545	BY21311_03167	DPMP315_02165	holo-ACP synthase [Pectobacterium]
group_1546	BY21311_04079	DPMP315_04054	glycerol-3-phosphate transporter [Pectobacterium]
group_1547	BY21311_02503	DPMP315_02545	cytochrome c biogenesis heme-transporting ATPase CcmA [Pectobacterium]
group_1548	BY21311_02146	DPMP315_01761	electron transport complex subunit RsxD [Pectobacterium]
group_1549	BY21311_04312	DPMP315_00650	hypothetical protein
group_155	BY21311_01007	DPMP315_00017	hypothetical protein [Pectobacterium]
group_1550	BY21311_03439	DPMP315_00851	amino acid ABC transporter ATP-binding protein [Pectobacterium]
group_1551	BY21311_00434	DPMP315_03996	helix-turn-helix transcriptional regulator [Pectobacterium]
group_1552	BY21311_01627	DPMP315_02480	cytidine deaminase [Pectobacterium]
group_1553	BY21311_00013	DPMP315_01539	PTS sugar transporter subunit IIB [Pectobacterium]
group_1554	BY21311_01147	DPMP315_00161	hypothetical protein
group_1555	BY21311_03228	DPMP315_02226	hypoxanthine phosphoribosyltransferase [Pectobacterium]
group_1556	BY21311_03344	DPMP315_01406	hypothetical protein
group_1557	BY21311_01505	DPMP315_04223	NADP-dependent oxidoreductase [Pectobacterium]
group_1558	BY21311_02459	DPMP315_02013	LutB/LldF family L-lactate oxidation iron-sulfur protein [Pectobacterium]
group_1559	BY21311_02583	DPMP315_01243	3-oxoacyl-ACP reductase FabG [Pectobacterium]
group_156	BY21311_01008	DPMP315_00018	hypothetical protein [Pectobacterium]
group_1560	BY21311_00349	DPMP315_03907	BolA family iron metabolism protein IbaG [Pectobacterium]
group_1561	BY21311_01868	DPMP315_02364	flagellar brake protein [Pectobacterium]
group_1562	BY21311_02125	DPMP315_01740	outer membrane protein OmpW [Pectobacterium]
group_1563	BY21311_00692	DPMP315_04358	ribosomal protein S18-alanine N-acetyltransferase [Pectobacterium]
group_1564	BY21311_03891	DPMP315_02385	peptide deformylase [Pectobacterium]
group_1565	BY21311_01119	DPMP315_00134	Fe(3+) dicitrate ABC transporter ATP-binding protein FecE [Pectobacterium]
group_1566	BY21311_03598	DPMP315_02752	hypothetical protein [Pectobacterium]
group_1567	BY21311_02380	DPMP315_01936	transcriptional regulator TyrR [Pectobacterium]
group_1568	BY21311_03711	DPMP315_02864	HTH-type transcriptional regulator SgrR [Pectobacterium]
group_1569	BY21311_03426	DPMP315_00864	MetQ/NlpA family lipoprotein [Pectobacterium]
group_157	BY21311_01013	DPMP315_00591	hypothetical protein
group_1570	BY21311_02865	DPMP315_03268	ABC-F family ATPase [Pectobacterium]
group_1571	BY21311_00335	DPMP315_03893	PTS IIA-like nitrogen regulatory protein PtsN [Pectobacterium]
group_1572	BY21311_03668	DPMP315_02822	type II secretion system protein GspE [Pectobacterium]
group_1573	BY21311_00255	DPMP315_03040	elongation factor Tu [Pectobacterium]
group_1574	BY21311_02043	DPMP315_01659	PTS mannose transporter subunit IID [Pectobacterium]
group_1575	BY21311_02290	DPMP315_01844	response regulator transcription factor [Pectobacterium]
group_1576	BY21311_00671	DPMP315_04379	tRNA pseudouridine(55) synthase TruB [Pectobacterium]
group_1577	BY21311_02347	DPMP315_01903	dihydromonapterin reductase [Pectobacterium]
group_1578	BY21311_00457	DPMP315_04018	LPS export ABC transporter permease LptG [Pectobacterium]
group_1579	BY21311_00856	DPMP315_00493	hypothetical protein
group_158	BY21311_01016	DPMP315_00590	conjugal transfer protein TraF [Pectobacterium]
group_1580	BY21311_00036	DPMP315_01512	glycoside hydrolase family 1 protein [Pectobacterium]
group_1581	BY21311_02906	DPMP315_03309	colicin V production protein [Pectobacterium]
group_1582	BY21311_00615	DPMP315_04430	tagaturonate reductase [Pectobacterium]
group_1583	BY21311_02881	DPMP315_03284	NADH-quinone oxidoreductase subunit NuoE [Pectobacterium sp.]
group_1584	BY21311_01863	DPMP315_02369	citrate lyase acyl carrier protein [Pectobacterium]
group_1585	BY21311_00654	DPMP315_04394	Obg family GTPase CgtA [Pectobacterium]
group_1586	BY21311_02588	DPMP315_01248	23S rRNA accumulation protein YceD [Pectobacterium]
group_1587	BY21311_03775	DPMP315_02928	arginine exporter ArgO [Pectobacterium]
group_1588	BY21311_01907	DPMP315_02325	methyl-accepting chemotaxis protein [Pectobacterium]
group_1589	BY21311_01325	DPMP315_00338	23S rRNA (pseudouridine(1915)-N(3))-methyltransferase RlmH [Pectobacterium]
group_159	BY21311_01020	DPMP315_00035	site-specific integrase [Pectobacterium]
group_1590	BY21311_03979	DPMP315_01421	M20 family metallopeptidase [Pectobacterium]
group_1591	BY21311_01994	DPMP315_01610	DNA-binding protein [Pectobacterium]
group_1592	BY21311_01267	DPMP315_00279	multifunctional acyl-CoA thioesterase I/protease I/lysophospholipase L1 [Pectobacterium]
group_1593	BY21311_04321	DPMP315_00642	tRNA (guanosine(18)-2'-O)-methyltransferase TrmH [Pectobacterium]
group_1594	BY21311_00354	DPMP315_03912	cell division protein ZapE [Pectobacterium]
group_1595	BY21311_02064	DPMP315_01680	DNA polymerase III subunit theta [Pectobacterium]
group_1596	BY21311_02444	DPMP315_01999	transcriptional regulator SlyA [Pectobacterium]
group_1597	BY21311_03731	DPMP315_02884	type 3 dihydrofolate reductase [Pectobacterium]
group_1598	BY21311_04207	DPMP315_00750	50S ribosomal protein L33 [Enterobacterales]
group_1599	BY21311_00706	DPMP315_04344	glycine cleavage system protein GcvH [Pectobacterium]
group_16	BY21311_01233 BY21311_01234	DPMP315_00246 DPMP315_02049	discoidin domain-containing protein [Pectobacterium]
group_160	BY21311_01029	DPMP315_00044	alpha/beta fold hydrolase [Pectobacterium]
group_1600	BY21311_01710	DPMP315_03761	GPW/gp25 family protein [Pectobacterium]
group_1601	BY21311_00136	DPMP315_01153	GntP family transporter [Pectobacterium]
group_1602	BY21311_02619	DPMP315_01277	FtsH protease modulator YccA [Pectobacterium]
group_1603	BY21311_02172	DPMP315_00917	hypothetical protein [Pectobacterium]
group_1604	BY21311_00551	DPMP315_01079	isochorismate synthase MenF [Pectobacterium]
group_1605	BY21311_03480	DPMP315_00809	MFS transporter [Pectobacterium]
group_1606	BY21311_01844	DPMP315_03624	30S ribosomal protein S1 [Pectobacterium]
group_1607	BY21311_00118	DPMP315_01171	hypothetical protein
group_1608	BY21311_03181	DPMP315_02179	autonomous glycyl radical cofactor GrcA [Bacteria]
group_1609	BY21311_01028	DPMP315_00043	hypothetical protein
group_161	BY21311_01034	DPMP315_00049	tRNA (guanosine(46)-N7)-methyltransferase TrmB [Pectobacterium]
group_1610	BY21311_03993	DPMP315_01434	peptidoglycan glycosyltransferase/peptidoglycan DD-transpeptidase MrcA [Pectobacterium]
group_1611	BY21311_04287	DPMP315_00675	RICIN domain-containing protein [Pectobacterium]
group_1612	BY21311_02127	DPMP315_01742	tryptophan synthase subunit alpha [Pectobacterium]
group_1613	BY21311_03666	DPMP315_02820	carboxylating nicotinate-nucleotide diphosphorylase [Pectobacterium]
group_1614	BY21311_00786	DPMP315_02612	hypothetical protein [Pectobacterium]
group_1615	BY21311_02623	DPMP315_01281	CoA-binding protein [Pectobacterium]
group_1616	BY21311_02143	DPMP315_01758	endonuclease III [Pectobacterium]
group_1617	BY21311_00819	DPMP315_02584	LacI family DNA-binding transcriptional regulator [Pectobacterium]
group_1618	BY21311_03616	DPMP315_02770	tellurite resistance TerB family protein [Pectobacterium]
group_1619	BY21311_03814	DPMP315_02966	N-acetylmuramoyl-L-alanine amidase AmiB [Pectobacterium]
group_162	BY21311_01048	DPMP315_00062	prepilin peptidase-dependent protein [Pectobacterium]
group_1620	BY21311_03035	DPMP315_03414	HAAAP family serine/threonine permease [Pectobacterium]
group_1621	BY21311_02134	DPMP315_01749	threonylcarbamoyl-AMP synthase [Pectobacterium]
group_1622	BY21311_02704	DPMP315_02283	protein phosphatase CheZ [Pectobacterium]
group_1623	BY21311_03855	DPMP315_02670	fumarate reductase (quinol) flavoprotein subunit [Pectobacterium]
group_1624	BY21311_03171	DPMP315_02169	ribonuclease III [Pectobacterium]
group_1625	BY21311_03453	DPMP315_00837	6-carboxytetrahydropterin synthase QueD [Pectobacterium]
group_1626	BY21311_01435	DPMP315_00448	formate dehydrogenase subunit beta [Pectobacterium]
group_1627	BY21311_02102	DPMP315_01717	formyltetrahydrofolate deformylase [Pectobacterium]
group_1628	BY21311_00168	DPMP315_01124	aquaporin [Pectobacterium]
group_1629	BY21311_00776	DPMP315_02622	L,D-transpeptidase family protein [Pectobacterium]
group_163	BY21311_01050	DPMP315_00064	hypothetical protein
group_1630	BY21311_00381	DPMP315_03938	hypothetical protein
group_1631	BY21311_00446	DPMP315_04007	ribonuclease E inhibitor RraB [Pectobacterium]
group_1632	BY21311_01796	DPMP315_03664	YbjO family protein [Pectobacterium]
group_1633	BY21311_02218	DPMP315_00871	lipoprotein insertase outer membrane protein LolB [Pectobacterium]
group_1634	BY21311_00597	DPMP315_04448	4-hydroxybenzoate octaprenyltransferase [Pectobacterium]
group_1635	BY21311_03509	DPMP315_00782	hypothetical protein
group_1636	BY21311_03256	DPMP315_01321	two-component system response regulator BtsR [Pectobacterium]
group_1637	BY21311_04411	DPMP315_01553	membrane protein insertase YidC [Pectobacterium]
group_1638	BY21311_01577	DPMP315_04295	MFS transporter [Pectobacterium]
group_1639	BY21311_00912	DPMP315_00545	hypothetical protein
group_164	BY21311_01056	DPMP315_00069	LacI family DNA-binding transcriptional regulator [Pectobacterium]
group_1640	BY21311_03752	DPMP315_02905	molybdopterin adenylyltransferase [Pectobacterium]
group_1641	BY21311_02182	DPMP315_00907	TetR/AcrR family transcriptional regulator [Pectobacterium]
group_1642	BY21311_03740	DPMP315_02893	4-hydroxy-3-methylbut-2-enyl diphosphate reductase [Pectobacterium]
group_1643	BY21311_02055	DPMP315_01671	long-chain-fatty-acid--CoA ligase FadD [Pectobacterium]
group_1644	BY21311_03154	DPMP315_03530	tRNA adenosine(34) deaminase TadA [Pectobacterium]
group_1645	BY21311_02014	DPMP315_01630	integration host factor subunit alpha [Pectobacterium]
group_1646	BY21311_00159	DPMP315_01133	cell-envelope stress modulator CpxP [Pectobacterium]
group_1647	BY21311_02871	DPMP315_03274	stress response protein ElaB [Pectobacterium]
group_1648	BY21311_02114	DPMP315_01729	ABC transporter ATP-binding protein [Pectobacterium]
group_1649	BY21311_02155	DPMP315_01770	L-arabinose ABC transporter permease AraH [Pectobacterium]
group_165	BY21311_01067	DPMP315_00079	M20 family metallopeptidase [Pectobacterium]
group_1650	BY21311_01217	DPMP315_00230	type B 50S ribosomal protein L31 [Pectobacterium]
group_1651	BY21311_03636	DPMP315_02789	allose kinase [Pectobacterium]
group_1652	BY21311_02369	DPMP315_01925	PAS domain-containing methyl-accepting chemotaxis protein [Pectobacterium]
group_1653	BY21311_00601	DPMP315_04444	zinc uptake transcriptional repressor Zur [Pectobacterium]
group_1654	BY21311_00984	DPMP315_00024	TetR/AcrR family transcriptional regulator [Pectobacterium]
group_1655	BY21311_01922	DPMP315_00941	arginine--tRNA ligase [Pectobacterium]
group_1656	BY21311_03258	DPMP315_01323	methyltransferase domain-containing protein [Pectobacterium]
group_1657	BY21311_03785	DPMP315_02938	3-keto-L-gulonate-6-phosphate decarboxylase UlaD [Pectobacterium]
group_1658	BY21311_02429	DPMP315_01985	GTP cyclohydrolase II [Pectobacterium]
group_1659	BY21311_01170	DPMP315_00183	preprotein translocase subunit YajC [Pectobacterium]
group_166	BY21311_01085	DPMP315_00097	hypothetical protein
group_1660	BY21311_02216	DPMP315_00873	peptide chain release factor 1 [Pectobacterium]
group_1661	BY21311_02712	DPMP315_02275	flagellar motor stator protein MotA [Pectobacterium]
group_1662	BY21311_03802	DPMP315_02954	YqgE/AlgH family protein [Pectobacterium]
group_1663	BY21311_00448	DPMP315_04009	YjgN family protein [Pectobacterium]
group_1664	BY21311_01249	DPMP315_00261	ribonucleoside-diphosphate reductase subunit alpha [Pectobacterium]
group_1665	BY21311_03909	DPMP315_02403	30S ribosomal protein S14 [Pectobacterium]
group_1666	BY21311_00512	DPMP315_01038	YoeB-YefM toxin-antitoxin system antitoxin YefM [Pectobacterium]
group_1667	BY21311_00904	DPMP315_00537	hypothetical protein [Pectobacterium]
group_1668	BY21311_02034	DPMP315_01650	fructosamine kinase family protein [Pectobacterium]
group_1669	BY21311_03705	DPMP315_02859	AzlC family ABC transporter permease [Pectobacterium]
group_167	BY21311_01091	DPMP315_00103	bifunctional uridylyltransferase/uridylyl-removing protein GlnD [Pectobacterium]
group_1670	BY21311_03618	DPMP315_02772	TerD family protein [Pectobacterium]
group_1671	BY21311_01829	DPMP315_03639	outer membrane lipoprotein chaperone LolA [Pectobacterium]
group_1672	BY21311_00244	DPMP315_03540	IMPACT family protein [Pectobacterium]
group_1673	BY21311_03741	DPMP315_02894	FKBP-type peptidyl-prolyl cis-trans isomerase [Pectobacterium]
group_1674	BY21311_03657	DPMP315_02811	hypothetical protein [Pectobacterium]
group_1675	BY21311_02317	DPMP315_01873	ABC transporter permease [Pectobacterium]
group_1676	BY21311_04410	DPMP315_01554	tRNA uridine-5-carboxymethylaminomethyl(34) synthesis GTPase MnmE [Pectobacterium]
group_1677	BY21311_03829	DPMP315_02981	hypothetical protein [Pectobacterium]
group_1678	BY21311_01882	DPMP315_02350	right-handed parallel beta-helix repeat-containing protein [Pectobacterium]
group_1679	BY21311_01071	DPMP315_00083	ABC transporter substrate-binding protein [Pectobacterium]
group_168	BY21311_01111	DPMP315_00122	VOC family protein [Pectobacterium]
group_1680	BY21311_00091	DPMP315_03133	Imm2 family immunity protein [Pectobacterium]
group_1681	BY21311_00048	DPMP315_01500	ABC transporter substrate-binding protein [Pectobacterium]
group_1682	BY21311_01636	DPMP315_02471	hypothetical protein [Pectobacterium]
group_1683	BY21311_04111	DPMP315_04086	amino acid ABC transporter ATP-binding protein [Pectobacterium]
group_1684	BY21311_00125	DPMP315_01164	aspartate 1-decarboxylase autocleavage activator PanM [Pectobacterium]
group_1685	BY21311_00645	DPMP315_04403	transcriptional regulator ArgR [Pectobacterium]
group_1686	BY21311_02029	DPMP315_01645	2-dehydro-3-deoxy-D-gluconate 5-dehydrogenase KduD [Pectobacterium]
group_1687	BY21311_02692	DPMP315_02295	flagellar basal-body rod protein FlgG [Pectobacterium]
group_1688	BY21311_03454	DPMP315_00836	7-carboxy-7-deazaguanine synthase QueE [Pectobacterium]
group_1689	BY21311_03415	DPMP315_03195	thioredoxin TrxC [Pectobacterium]
group_169	BY21311_01112	DPMP315_00123	tRNA lysidine(34) synthetase TilS [Pectobacterium]
group_1690	BY21311_03170	DPMP315_02168	GTPase Era [Pectobacterium]
group_1691	BY21311_02349	DPMP315_01905	hypothetical protein [Pectobacterium]
group_1692	BY21311_01989	DPMP315_01605	tRNA 2-thiouridine(34) synthase MnmA [Pectobacterium]
group_1693	BY21311_04378	DPMP315_02998	phosphate signaling complex protein PhoU [Pectobacterium]
group_1694	BY21311_02703	DPMP315_02284	flagellar type III secretion system protein FlhB [Pectobacterium]
group_1695	BY21311_01785	DPMP315_03676	deoxyribose-phosphate aldolase [Pectobacterium]
group_1696	BY21311_00263	DPMP315_03048	DNA-directed RNA polymerase subunit beta' [Pectobacterium]
group_1697	BY21311_02414	DPMP315_01970	stress response translation initiation inhibitor YciH [Pectobacterium]
group_1698	BY21311_02392	DPMP315_01948	phage shock protein operon transcriptional activator [Pectobacterium]
group_1699	BY21311_03760	DPMP315_02913	two-component system response regulator ArcA [Pectobacterium]
group_17	BY21311_02668 BY21311_02735	DPMP315_02319 DPMP315_02248	flagellin [Pectobacterium]
group_170	BY21311_01130	DPMP315_00144	sulfite exporter TauE/SafE family protein [Pectobacterium]
group_1700	BY21311_01154	DPMP315_00168	fructokinase [Pectobacterium]
group_1701	BY21311_02257	DPMP315_01811	urea ABC transporter permease subunit UrtC [Pectobacterium]
group_1702	BY21311_01115	DPMP315_00126	YaeQ family protein [Pectobacterium]
group_1703	BY21311_01740	DPMP315_03721	YecH family protein [Pectobacterium]
group_1704	BY21311_01638	DPMP315_02469	excinuclease ABC subunit B [Pectobacterium]
group_1705	BY21311_04209	DPMP315_00748	DNA repair protein RadC [Pectobacterium]
group_1706	BY21311_01589	DPMP315_04307	helix-turn-helix transcriptional regulator [Pectobacterium]
group_1707	BY21311_03522	DPMP315_00769	peptide chain release factor H [Pectobacterium]
group_1708	BY21311_00046	DPMP315_01502	2-hydroxycarboxylate transporter family protein [Pectobacterium]
group_1709	BY21311_01171	DPMP315_00184	protein translocase subunit SecD [Pectobacterium]
group_171	BY21311_01142	DPMP315_00156	Ig-like domain-containing protein [Pectobacterium]
group_1710	BY21311_01855	DPMP315_02377	hypothetical protein [Pectobacterium]
group_1711	BY21311_04131	DPMP315_04106	UDP-N-acetyl-D-mannosamine dehydrogenase [Pectobacterium]
group_1712	BY21311_01035	DPMP315_00050	YggL family protein [Pectobacterium]
group_1713	BY21311_00191	DPMP315_01101	methylenetetrahydrofolate reductase [Pectobacterium]
group_1714	BY21311_00600	DPMP315_04445	transcriptional repressor LexA [Pectobacterium]
group_1715	BY21311_03053	DPMP315_03433	hypothetical protein [Pectobacterium]
group_1716	BY21311_02113	DPMP315_01728	oligopeptide ABC transporter permease OppC [Pectobacterium]
group_1717	BY21311_03292	DPMP315_01360	hypothetical protein [Pectobacterium]
group_1718	BY21311_01318	DPMP315_00331	lipoyl synthase [Pectobacterium]
group_1719	BY21311_02617	DPMP315_01275	biofilm development regulator YmgB/AriR family protein [Pectobacterium]
group_172	BY21311_01202	DPMP315_00215	YbgC/FadM family acyl-CoA thioesterase [Pectobacterium]
group_1720	BY21311_01579	DPMP315_04297	AraC family transcriptional regulator [Pectobacterium]
group_1721	BY21311_02163	DPMP315_00926	mannose-6-phosphate isomerase [Pectobacterium]
group_1722	BY21311_04306	DPMP315_00656	universal stress protein UspA [Pectobacterium]
group_1723	BY21311_01181	DPMP315_00194	exodeoxyribonuclease VII small subunit [Pectobacterium]
group_1724	BY21311_03028	DPMP315_03407	ribosome-associated protein YbcJ [Pectobacterium]
group_1725	BY21311_01368	DPMP315_00381	hypothetical protein
group_1726	BY21311_00849	DPMP315_00486	response regulator transcription factor [Pectobacterium]
group_1727	BY21311_00721	DPMP315_04329	FAD assembly factor SdhE [Pectobacterium]
group_1728	BY21311_01400	DPMP315_00413	hypothetical protein
group_1729	BY21311_00416	DPMP315_03974	LacI family DNA-binding transcriptional regulator [Pectobacterium]
group_173	BY21311_01222	DPMP315_00235	primosomal replication protein [Pectobacterium]
group_1730	BY21311_01864	DPMP315_02368	citrate (pro-3S)-lyase subunit beta [Pectobacterium]
group_1731	BY21311_00229	DPMP315_03076	Sec-independent protein translocase protein TatB [Pectobacterium]
group_1732	BY21311_03391	DPMP315_02150	oxalurate catabolism protein HpxX [Pectobacterium]
group_1733	BY21311_01101	DPMP315_00112	sigma E protease regulator RseP [Pectobacterium]
group_1734	BY21311_01165	DPMP315_00178	peroxiredoxin C [Pectobacterium]
group_1735	BY21311_02248	DPMP315_01798	transporter substrate-binding domain-containing protein [Pectobacterium]
group_1736	BY21311_02324	DPMP315_01880	GlsB/YeaQ/YmgE family stress response membrane protein [Pectobacterium]
group_1737	BY21311_01239	DPMP315_00251	Cys-tRNA(Pro)/Cys-tRNA(Cys) deacylase YbaK [Pectobacterium]
group_1738	BY21311_00213	DPMP315_03091	branched-chain amino acid transaminase [Pectobacterium]
group_1739	BY21311_02044	DPMP315_01660	PTS mannose/fructose/sorbose transporter subunit IIC [Pectobacterium]
group_174	BY21311_01237	DPMP315_00249	GTPase [Pectobacterium]
group_1740	BY21311_03710	DPMP315_02863	glucose uptake inhibitor SgrT [Pectobacterium]
group_1741	BY21311_02144	DPMP315_01759	electron transport complex subunit E [Pectobacterium]
group_1742	BY21311_01247	DPMP315_00259	class I ribonucleotide reductase maintenance protein YfaE [Pectobacterium]
group_1743	BY21311_00370	DPMP315_03927	YraN family protein [Pectobacterium]
group_1744	BY21311_02750	DPMP315_03175	UvrY/SirA/GacA family response regulator transcription factor [Pectobacterium]
group_1745	BY21311_01390	DPMP315_00403	cyd operon protein YbgE [Pectobacterium]
group_1746	BY21311_01827	DPMP315_03641	leucine-responsive transcriptional regulator Lrp [Pectobacteriaceae]
group_1747	BY21311_03180	DPMP315_02178	ATP-dependent RNA helicase SrmB [Pectobacterium]
group_1748	BY21311_00436	DPMP315_03998	hypothetical protein [Pectobacterium]
group_1749	BY21311_03907	DPMP315_02401	50S ribosomal protein L6 [Pectobacterium]
group_175	BY21311_01329	DPMP315_00342	LPS assembly lipoprotein LptE [Pectobacterium]
group_1750	BY21311_01668	DPMP315_03803	epoxyqueuosine reductase QueH [Pectobacterium]
group_1751	BY21311_03730	DPMP315_02883	hypothetical protein [Pectobacterium]
group_1752	BY21311_03691	DPMP315_02845	cell division protein FtsL [Pectobacterium]
group_1753	BY21311_03648	DPMP315_02801	protein YacL [Pectobacterium]
group_1754	BY21311_03128	DPMP315_03506	Fe-S cluster assembly scaffold IscU [Pectobacterium]
group_1755	BY21311_00353	DPMP315_03911	hypothetical protein
group_1756	BY21311_00542	DPMP315_01070	peptide chain release factor 3 [Pectobacterium]
group_1757	BY21311_00233	DPMP315_03072	transcription/translation regulatory transformer protein RfaH [Pectobacterium]
group_1758	BY21311_00892	DPMP315_00526	amino acid ABC transporter permease [Pectobacterium]
group_1759	BY21311_00712	DPMP315_04338	phosphodiesterase [Pectobacterium]
group_176	BY21311_01336	DPMP315_00349	apolipoprotein N-acyltransferase [Pectobacterium]
group_1760	BY21311_03952	DPMP315_02446	OsmC family protein [Pectobacterium]
group_1761	BY21311_04087	DPMP315_04062	EamA family transporter RarD [Pectobacterium]
group_1762	BY21311_03505	DPMP315_00786	YtfJ family protein [Pectobacterium]
group_1763	BY21311_03424	DPMP315_00866	methionine ABC transporter ATP-binding protein MetN [Pectobacterium]
group_1764	BY21311_03672	DPMP315_02826	cell division protein ZapD [Pectobacterium]
group_1765	BY21311_01598	DPMP315_03838	gamma-glutamylcyclotransferase [Pectobacterium]
group_1766	BY21311_03119	DPMP315_03497	nucleoside-diphosphate kinase [Pectobacterium]
group_1767	BY21311_00369	DPMP315_03926	DnaA initiator-associating protein DiaA [Pectobacterium]
group_1768	BY21311_02264	DPMP315_01818	porin [Pectobacterium]
group_1769	BY21311_01280	DPMP315_00293	thioredoxin-dependent thiol peroxidase [Pectobacterium]
group_177	BY21311_01350	DPMP315_00363	ROK family protein [Pectobacterium]
group_1770	BY21311_00656	DPMP315_04392	transcription elongation factor GreA [Pectobacterium]
group_1771	BY21311_03039	DPMP315_03418	YolA family protein [Pectobacterium]
group_1772	BY21311_00815	DPMP315_02588	sugar ABC transporter permease [Pectobacterium]
group_1773	BY21311_02904	DPMP315_03307	UbiX family flavin prenyltransferase [Pectobacterium]
group_1774	BY21311_02681	DPMP315_02306	flagellar motor switch protein FliN [Pectobacterium]
group_1775	BY21311_00034	DPMP315_01514	PTS sugar transporter subunit IIB [Pectobacterium]
group_1776	BY21311_03147	DPMP315_03524	nitrogen regulatory protein P-II [Pectobacterium]
group_1777	BY21311_01996	DPMP315_01612	hypothetical protein [Pectobacterium]
group_1778	BY21311_03123	DPMP315_03501	Fe-S cluster assembly protein IscX [Pectobacterium]
group_1779	BY21311_02448	DPMP315_02003	Grx4 family monothiol glutaredoxin [Pectobacterium]
group_178	BY21311_01351	DPMP315_00364	N-acetylglucosamine-6-phosphate deacetylase [Pectobacterium]
group_1780	BY21311_02068	DPMP315_01683	fatty acid metabolism transcriptional regulator FadR [Pectobacterium]
group_1781	BY21311_01363	DPMP315_00376	two-component system response regulator KdpE [Pectobacterium]
group_1782	BY21311_00356	DPMP315_03914	30S ribosomal protein S9 [Pectobacterium]
group_1783	BY21311_02066	DPMP315_01681	disulfide bond formation protein DsbB [Pectobacterium]
group_1784	BY21311_02272	DPMP315_01827	type III secretion system chaperone [Pectobacterium]
group_1785	BY21311_02168	DPMP315_00921	ROK family transcriptional regulator [Pectobacterium]
group_1786	BY21311_01941	DPMP315_00958	PTS lactose/cellobiose transporter subunit IIA [Pectobacterium]
group_1787	BY21311_00658	DPMP315_04390	23S rRNA (uridine(2552)-2'-O)-methyltransferase RlmE [Pectobacterium]
group_1788	BY21311_02584	DPMP315_01244	ACP S-malonyltransferase [Pectobacterium]
group_1789	BY21311_01825	DPMP315_03642	thioredoxin-disulfide reductase [Pectobacterium]
group_179	BY21311_01352	DPMP315_00365	glucosamine-6-phosphate deaminase [Pectobacterium]
group_1790	BY21311_03265	DPMP315_01330	S-ribosylhomocysteine lyase [Pectobacterium]
group_1791	BY21311_03343	DPMP315_01405	type VI secretion system contractile sheath small subunit [Pectobacterium]
group_1792	BY21311_03905	DPMP315_02399	30S ribosomal protein S5 [Pectobacteriaceae]
group_1793	BY21311_00704	DPMP315_04346	hypothetical protein [Pectobacterium]
group_1794	BY21311_00835	DPMP315_00469	GNAT family acetyltransferase [Pectobacterium]
group_1795	BY21311_02301	DPMP315_01855	type III secretion system export apparatus subunit SctS [Pectobacterium]
group_1796	BY21311_01644	DPMP315_02463	cyclic pyranopterin monophosphate synthase MoaC [Pectobacterium]
group_1797	BY21311_01846	DPMP315_03622	bifunctional phosphoribosyl-AMP cyclohydrolase/phosphoribosyl-ATP diphosphatase HisIE [Pectobacterium]
group_1798	BY21311_00182	DPMP315_01110	met regulon transcriptional regulator MetJ [Pectobacteriaceae]
group_1799	BY21311_02823	DPMP315_03127	helix-turn-helix domain-containing protein [Pectobacterium]
era	BY21311_02730 BY21311_02989	DPMP315_02254 DPMP315_02255	GTPase Era
group_180	BY21311_01353	DPMP315_00366	N-acetylglucosamine-specific PTS transporter subunit IIBC [Pectobacterium]
group_1800	BY21311_01419	DPMP315_00432	AcrZ family multidrug efflux pump-associated protein [Pectobacterium]
group_1801	BY21311_03281	DPMP315_01346	sensor domain-containing diguanylate cyclase [Pectobacterium]
group_1802	BY21311_04260	DPMP315_00701	xylose isomerase [Pectobacterium]
group_1803	BY21311_02912	DPMP315_03315	aspartate-semialdehyde dehydrogenase [Pectobacterium]
group_1804	BY21311_02504	DPMP315_02546	heme lyase NrfEFG subunit NrfG [Pectobacterium]
group_1806	BY21311_00218	DPMP315_03086	GntR family transcriptional regulator [Pectobacterium]
group_1807	BY21311_03985	DPMP315_01427	3-dehydroquinate synthase [Pectobacterium]
group_1808	BY21311_00784	DPMP315_02614	GNAT family N-acetyltransferase [Pectobacterium]
group_1809	BY21311_01722	DPMP315_03749	outer membrane protein OmpX [Pectobacterium]
group_181	BY21311_01360	DPMP315_00373	replication initiation negative regulator SeqA [Pectobacterium]
group_1810	BY21311_03789	DPMP315_02942	class II fructose-bisphosphate aldolase [Pectobacterium]
group_1811	BY21311_01226	DPMP315_00239	YbaB/EbfC family nucleoid-associated protein [Pectobacterium]
group_1812	BY21311_03664	DPMP315_02818	1,6-anhydro-N-acetylmuramyl-L-alanine amidase AmpD [Pectobacterium]
group_1813	BY21311_02597	DPMP315_01257	biofilm formation regulator BssS [Pectobacterium]
group_1814	BY21311_02038	DPMP315_01654	metal ABC transporter substrate-binding protein [Pectobacterium]
group_1815	BY21311_02858	DPMP315_03261	glutamine amidotransferase [Pectobacterium]
group_1816	BY21311_02962	DPMP315_03365	type II secretion system minor pseudopilin GspH [Pectobacterium]
group_1817	BY21311_02706	DPMP315_02281	chemotaxis response regulator protein-glutamate methylesterase [Pectobacterium]
group_1818	BY21311_03614	DPMP315_02768	tellurium resistance TerZ family protein [Pectobacterium]
group_1819	BY21311_00172	DPMP315_01120	HslU--HslV peptidase ATPase subunit [Pectobacterium]
group_182	BY21311_01367	DPMP315_00380	potassium-transporting ATPase subunit KdpA [Pectobacterium]
group_1820	BY21311_03655	DPMP315_02809	hypothetical protein [Pectobacterium]
group_1821	BY21311_01794	DPMP315_03666	putrescine ABC transporter permease PotH [Pectobacterium]
group_1822	BY21311_01137	DPMP315_00151	pectate lyase [Pectobacterium]
group_1823	BY21311_03975	DPMP315_01417	ABC transporter permease subunit [Pectobacterium]
group_1824	BY21311_01707	DPMP315_03764	tail protein X [Pectobacterium]
group_1825	BY21311_00623	DPMP315_04422	hypothetical protein [Pectobacterium]
group_1826	BY21311_02371	DPMP315_01927	hypothetical protein
group_1827	BY21311_00259	DPMP315_03044	50S ribosomal protein L1 [Pectobacterium]
group_1828	BY21311_03254	DPMP315_01319	bifunctional chorismate mutase/prephenate dehydrogenase [Pectobacterium]
group_1829	BY21311_00751	DPMP315_02643	type II secretion system F family protein [Pectobacterium]
group_183	BY21311_01372	DPMP315_00385	type 2 GTP cyclohydrolase I [Pectobacterium]
group_1830	BY21311_00339	DPMP315_03897	lipopolysaccharide ABC transporter substrate-binding protein LptA [Pectobacterium]
group_1831	BY21311_03911	DPMP315_02405	50S ribosomal protein L24 [Pectobacteriaceae]
group_1832	BY21311_00647	DPMP315_04401	helix-turn-helix domain-containing protein [Pectobacterium]
group_1833	BY21311_02635	DPMP315_01293	bifunctional 3-hydroxydecanoyl-ACP dehydratase/trans-2-decenoyl-ACP isomerase [Pectobacterium]
group_1834	BY21311_01313	DPMP315_00326	nuclear transport factor 2 family protein [Pectobacterium]
group_1835	BY21311_03156	DPMP315_03532	N-acetylmuramic acid 6-phosphate etherase [Pectobacterium]
group_1836	BY21311_01930	DPMP315_00947	MAPEG family protein [Pectobacterium]
group_1837	BY21311_02118	DPMP315_01733	YciY family protein [Pectobacterium]
group_1838	BY21311_04350	DPMP315_03026	YgiW/YdeI family stress tolerance OB fold protein [Pectobacterium]
group_1839	BY21311_03575	DPMP315_02734	YitT family protein [Pectobacterium]
group_184	BY21311_01413	DPMP315_00426	copper-binding protein [Pectobacterium]
group_1840	BY21311_04022	DPMP315_01463	hypothetical protein [Pectobacterium]
group_1841	BY21311_02116	DPMP315_01731	HI1450 family dsDNA-mimic protein [Pectobacterium]
group_1842	BY21311_03056	DPMP315_03436	HTH-type transcriptional regulator GalR [Pectobacterium]
group_1843	BY21311_04230	DPMP315_00731	helix-turn-helix domain-containing protein [Pectobacterium]
group_1844	BY21311_00323	DPMP315_03881	ribonuclease G [Pectobacterium]
group_1845	BY21311_02214	DPMP315_00875	SirB2 family protein [Pectobacterium]
group_1846	BY21311_03602	DPMP315_02756	kinase [Pectobacterium]
group_1847	BY21311_00801	DPMP315_02602	type II toxin-antitoxin system RatA family toxin [Pectobacterium]
group_1848	BY21311_02562	DPMP315_01223	TetR/AcrR family transcriptional regulator [Pectobacterium]
group_1849	BY21311_00986	DPMP315_00026	thioredoxin family protein [Pectobacterium]
group_185	BY21311_01440	DPMP315_00452	uridine kinase [Pectobacterium]
group_1850	BY21311_00520	DPMP315_01046	Imm10 family immunity protein [Pectobacterium]
group_1851	BY21311_00164	DPMP315_01128	hypothetical protein
group_1852	BY21311_00319	DPMP315_03877	rod shape-determining protein MreB [Pectobacterium]
group_1853	BY21311_02974	DPMP315_03377	D-amino-acid transaminase [Pectobacterium]
group_1854	BY21311_03235	DPMP315_02233	glutaredoxin-like protein NrdH [Pectobacterium]
group_1855	BY21311_03818	DPMP315_02970	alkyl hydroperoxide reductase subunit F [Pectobacterium]
group_1856	BY21311_02708	DPMP315_02279	methyl-accepting chemotaxis protein [Pectobacterium]
group_1857	BY21311_03511	DPMP315_00780	FKBP-type peptidyl-prolyl cis-trans isomerase [Pectobacterium]
group_1858	BY21311_02138	DPMP315_01753	protease SohB [Pectobacterium]
group_1859	BY21311_01253	DPMP315_00265	transcriptional regulator RcsB [Pectobacterium]
group_186	BY21311_01444	DPMP315_00456	hypothetical protein
group_1860	BY21311_01092	DPMP315_00104	type I methionyl aminopeptidase [Pectobacterium]
group_1861	BY21311_02036	DPMP315_01652	metal ABC transporter permease [Pectobacterium]
group_1862	BY21311_02615	DPMP315_01273	isochorismatase family protein [Pectobacterium]
group_1863	BY21311_01333	DPMP315_00346	glutamate/aspartate ABC transporter permease GltK [Pectobacterium]
group_1864	BY21311_03673	DPMP315_02827	DNA gyrase inhibitor YacG [Pectobacterium]
group_1865	BY21311_02748	DPMP315_03173	CDP-diacylglycerol--glycerol-3-phosphate 3-phosphatidyltransferase [Pectobacterium]
group_1866	BY21311_02630	DPMP315_01288	cell division inhibitor SulA [Pectobacterium]
group_1867	BY21311_03177	DPMP315_02175	RNA polymerase sigma factor RpoE [Pectobacterium]
group_1868	BY21311_02529	DPMP315_02571	FAD-binding oxidoreductase [Pectobacterium]
group_1869	BY21311_03953	DPMP315_02447	cAMP-activated global transcriptional regulator CRP [Enterobacterales]
group_187	BY21311_01447	DPMP315_00460	UDP-N-acetylglucosamine--undecaprenyl-phosphate N-acetylglucosaminephosphotransferase [Pectobacterium]
group_1870	BY21311_01515	DPMP315_04233	response regulator transcription factor [Pectobacterium]
group_1871	BY21311_01554	DPMP315_04271	sigma-70 family RNA polymerase sigma factor [Pectobacterium]
group_1872	BY21311_00387	DPMP315_03944	ketose-bisphosphate aldolase [Pectobacterium]
group_1873	BY21311_00591	DPMP315_04452	membrane protein FxsA [Pectobacterium]
group_1874	BY21311_04058	DPMP315_03221	GntP family permease [Pectobacterium]
group_1875	BY21311_02310	DPMP315_01866	HAD hydrolase-like protein [Pectobacterium]
group_1876	BY21311_01878	DPMP315_02354	lipid A ABC transporter ATP-binding protein/permease MsbA [Pectobacterium]
group_1877	BY21311_01189	DPMP315_00202	cytochrome o ubiquinol oxidase subunit III [Pectobacterium]
group_1878	BY21311_03642	DPMP315_02795	DeoR/GlpR family DNA-binding transcription regulator [Pectobacterium]
group_1879	BY21311_00412	DPMP315_03970	TRAP transporter substrate-binding protein [Pectobacterium]
group_188	BY21311_01448	DPMP315_00461	polysaccharide export protein [Pectobacterium]
group_1880	BY21311_01374	DPMP315_00387	biotin-dependent carboxyltransferase family protein [Pectobacterium]
group_1881	BY21311_02877	DPMP315_03280	NADH-quinone oxidoreductase subunit NuoI [Pectobacterium]
group_1882	BY21311_03342	DPMP315_01404	type VI secretion system contractile sheath large subunit [Pectobacterium]
group_1883	BY21311_01915	DPMP315_00934	lipoprotein [Pectobacterium]
group_1884	BY21311_02610	DPMP315_01269	hypothetical protein [Pectobacterium]
group_1885	BY21311_01719	DPMP315_03752	DNA starvation/stationary phase protection protein Dps [Pectobacterium]
group_1886	BY21311_03489	DPMP315_00800	inorganic triphosphatase [Pectobacterium]
group_1887	BY21311_02929	DPMP315_03332	molecular chaperone [Pectobacterium]
group_1888	BY21311_01211	DPMP315_00224	acyl-CoA thioesterase II [Pectobacterium]
group_1889	BY21311_00484	DPMP315_01010	LysR family transcriptional regulator [Pectobacterium]
group_189	BY21311_01449	DPMP315_00462	protein tyrosine phosphatase [Pectobacterium]
group_1890	BY21311_01422	DPMP315_00435	molybdenum ABC transporter ATP-binding protein ModC [Pectobacterium]
group_1891	BY21311_01876	DPMP315_02356	hypothetical protein
group_1892	BY21311_03230	DPMP315_02228	ABC transporter ATP-binding protein [Pectobacterium]
group_1893	BY21311_00607	DPMP315_04438	phage holin family protein [Pectobacterium]
group_1894	BY21311_01362	DPMP315_00375	EamA family transporter [Pectobacterium]
group_1895	BY21311_01535	DPMP315_04252	hypothetical protein
group_1896	BY21311_01674	DPMP315_03797	FMN-binding protein [Pectobacterium]
group_1897	BY21311_00694	DPMP315_04356	16S rRNA (guanine(1207)-N(2))-methyltransferase RsmC [Pectobacterium]
group_1898	BY21311_04056	DPMP315_03219	aspartate-semialdehyde dehydrogenase [Pectobacterium]
group_1899	BY21311_00733	DPMP315_04317	nuclear transport factor 2 family protein [Pectobacterium]
group_19	BY21311_03560 BY21311_03561	DPMP315_02720 DPMP315_04118	LysR family transcriptional regulator [Pectobacterium]
group_190	BY21311_01450	DPMP315_00463	tyrosine-protein kinase Wzc [Pectobacterium]
group_1900	BY21311_01089	DPMP315_00101	hypothetical protein
group_1901	BY21311_00525	DPMP315_01053	NADP-dependent oxidoreductase [Pectobacterium]
group_1902	BY21311_00404	DPMP315_03962	hypothetical protein
group_1903	BY21311_03409	DPMP315_03201	transcriptional repressor MprA [Pectobacterium]
group_1904	BY21311_04235	DPMP315_00726	AI-2E family transporter [Pectobacterium]
group_1905	BY21311_02533	DPMP315_01195	phosphoenolpyruvate synthase [Pectobacterium]
group_1906	BY21311_02242	DPMP315_01792	hypothetical protein
group_1907	BY21311_04355	DPMP315_03021	ATPase RavA stimulator ViaA [Pectobacterium]
group_1908	BY21311_00991	DPMP315_00031	aminotransferase class I/II-fold pyridoxal phosphate-dependent enzyme [Pectobacterium]
group_1909	BY21311_02476	DPMP315_02016	MarR family transcriptional regulator [Pectobacterium]
group_191	BY21311_01460	DPMP315_04177	dTDP-4-dehydrorhamnose reductase [Pectobacterium]
group_1910	BY21311_04314	DPMP315_00648	kdo(2)-lipid A phosphoethanolamine 7''-transferase [Pectobacterium]
group_1911	BY21311_03570	DPMP315_02729	replicative DNA helicase [Pectobacterium]
group_1912	BY21311_04169	DPMP315_04145	hypothetical protein
group_1913	BY21311_03077	DPMP315_03456	tRNA 5-hydroxyuridine modification protein YegQ [Pectobacterium]
group_1914	BY21311_01275	DPMP315_00288	uracil phosphoribosyltransferase [Pectobacterium]
group_1915	BY21311_03717	DPMP315_02870	acetolactate synthase small subunit [Pectobacterium]
group_1916	BY21311_02021	DPMP315_01637	metal-dependent hydrolase [Pectobacterium]
group_1917	BY21311_02696	DPMP315_02291	flagellar basal body rod protein FlgC [Pectobacteriaceae]
group_1918	BY21311_04364	DPMP315_03012	F0F1 ATP synthase subunit B [Pectobacterium]
group_1919	BY21311_02544	DPMP315_01206	NlpC/P60 family protein [Pectobacterium]
group_192	BY21311_01461	DPMP315_04178	dTDP-4-dehydrorhamnose 3,5-epimerase [Pectobacterium]
group_1920	BY21311_00677	DPMP315_04373	U32 family peptidase [Pectobacterium]
group_1921	BY21311_02963	DPMP315_03366	type II secretion system major pseudopilin GspG [Pectobacterium]
group_1922	BY21311_01193	DPMP315_00206	lipoprotein [Pectobacterium]
group_1923	BY21311_01806	DPMP315_03660	arginine ABC transporter permease ArtQ [Pectobacterium]
group_1924	BY21311_00173	DPMP315_01119	ATP-dependent protease subunit HslV [Pectobacterium]
group_1925	BY21311_02398	DPMP315_01954	peptide ABC transporter permease SapC [Pectobacterium]
group_1926	BY21311_03749	DPMP315_02902	molecular chaperone DnaK [Pectobacterium]
group_1927	BY21311_03945	DPMP315_02439	glutathione-regulated potassium-efflux system protein KefB [Pectobacterium]
group_1928	BY21311_00744	DPMP315_02636	Flp family type IVb pilin [Pectobacterium]
group_1929	BY21311_03298	DPMP315_01366	hypothetical protein
group_193	BY21311_01462	DPMP315_04179	glucose-1-phosphate thymidylyltransferase RfbA [Pectobacterium]
group_1930	BY21311_03479	DPMP315_00810	hypothetical protein
group_1931	BY21311_03241	DPMP315_02239	ribonuclease HI [Pectobacterium]
group_1932	BY21311_01407	DPMP315_00420	NAD(P)H-dependent oxidoreductase [Pectobacterium]
group_1933	BY21311_00474	DPMP315_00999	ribbon-helix-helix domain-containing protein [Pectobacteriaceae]
group_1934	BY21311_01886	DPMP315_02346	chromosome partition protein MukF [Pectobacterium]
group_1935	BY21311_04039	DPMP315_01480	thiosulfate sulfurtransferase GlpE [Pectobacterium]
group_1936	BY21311_01205	DPMP315_00218	hypothetical protein [Pectobacterium]
group_1937	BY21311_01079	DPMP315_00091	23S rRNA (cytidine(2498)-2'-O)-methyltransferase RlmM [Pectobacterium]
group_1938	BY21311_03500	DPMP315_00790	autotransporter assembly complex protein TamA [Pectobacterium]
group_1939	BY21311_03194	DPMP315_02193	DoxX family protein [Pectobacterium]
group_194	BY21311_01465	DPMP315_04182	hypothetical protein [Pectobacterium]
group_1940	BY21311_02095	DPMP315_01710	trimeric intracellular cation channel family protein [Pectobacterium]
group_1941	BY21311_02408	DPMP315_01964	FdhF/YdeP family oxidoreductase [Pectobacterium]
group_1942	BY21311_03107	DPMP315_03486	hypothetical protein [Pectobacterium]
group_1943	BY21311_03737	DPMP315_02890	carbamoyl-phosphate synthase large subunit [Pectobacterium]
group_1944	BY21311_01179	DPMP315_00192	1-deoxy-D-xylulose-5-phosphate synthase [Pectobacterium]
group_1945	BY21311_04265	DPMP315_00696	superoxide dismutase [Mn] [Pectobacterium]
group_1946	BY21311_04023	DPMP315_01464	alkaline phosphatase [Pectobacterium]
group_1947	BY21311_03792	DPMP315_02944	erythrose-4-phosphate dehydrogenase [Pectobacterium]
group_1948	BY21311_01093	DPMP315_00105	30S ribosomal protein S2 [Pectobacteriaceae]
group_1949	BY21311_03928	DPMP315_02422	elongation factor G [Pectobacterium]
group_195	BY21311_01468	DPMP315_04185	YjbH domain-containing protein [Pectobacterium]
group_1950	BY21311_01756	DPMP315_03705	PTS fructose transporter subunit IIBC [Pectobacterium]
group_1951	BY21311_03900	DPMP315_02394	30S ribosomal protein S11 [Bacteria]
group_1952	BY21311_03683	DPMP315_02837	UDP-N-acetylmuramate--L-alanine ligase [Pectobacterium]
group_1953	BY21311_00073	DPMP315_03149	valine--pyruvate transaminase [Pectobacterium]
group_1954	BY21311_01820	DPMP315_03647	phenazine biosynthesis protein [Pectobacterium]
group_1955	BY21311_01332	DPMP315_00345	amino acid ABC transporter ATP-binding protein [Pectobacterium]
group_1956	BY21311_02121	DPMP315_01736	TonB system transport protein TonB [Pectobacterium]
group_1957	BY21311_03493	DPMP315_00796	bifunctional dihydroneopterin aldolase/7,8-dihydroneopterin epimerase [Pectobacterium]
group_1958	BY21311_01240	DPMP315_00252	TraB/GumN family protein [Pectobacterium]
group_1959	BY21311_04019	DPMP315_01460	SUMF1/EgtB/PvdO family nonheme iron enzyme [Pectobacterium]
group_196	BY21311_01478	DPMP315_04195	3D-(3,5/4)-trihydroxycyclohexane-1,2-dione acylhydrolase (decyclizing) [Pectobacterium]
group_1960	BY21311_03545	DPMP315_02705	GNAT family N-acetyltransferase [Pectobacterium]
group_1961	BY21311_03919	DPMP315_02413	50S ribosomal protein L2 [Pectobacterium]
group_1962	BY21311_02568	DPMP315_01229	thiamine kinase [Pectobacterium]
group_1963	BY21311_03754	DPMP315_02907	transaldolase [Pectobacterium]
group_1964	BY21311_04224	DPMP315_00733	LysR family transcriptional regulator [Pectobacterium]
group_1965	BY21311_03620	DPMP315_02774	HAD-IB family hydrolase [Pectobacterium]
group_1966	BY21311_02012	DPMP315_01628	phenylalanine--tRNA ligase subunit alpha [Pectobacterium]
group_1967	BY21311_01695	DPMP315_03776	putative holin [Pectobacterium]
group_1968	BY21311_02184	DPMP315_00905	VF530 family protein [Pectobacterium]
group_1969	BY21311_01196	DPMP315_00209	ATP-dependent Clp endopeptidase proteolytic subunit ClpP [Pectobacterium]
group_197	BY21311_01487	DPMP315_04204	5-deoxy-glucuronate isomerase [Pectobacterium]
group_1970	BY21311_02885	DPMP315_03288	transcriptional regulator LrhA [Pectobacterium]
group_1971	BY21311_00611	DPMP315_04434	DedA family protein [Pectobacterium]
group_1972	BY21311_02966	DPMP315_03369	type II secretion system secretin GspD [Pectobacterium]
group_1973	BY21311_00078	DPMP315_03144	GntR family transcriptional regulator [Pectobacterium]
group_1974	BY21311_03923	DPMP315_02417	30S ribosomal protein S10 [Bacteria]
group_1975	BY21311_01041	DPMP315_00056	DNA mismatch repair endonuclease MutH [Pectobacterium]
group_1976	BY21311_01098	DPMP315_00109	1-deoxy-D-xylulose-5-phosphate reductoisomerase [Pectobacterium]
group_1977	BY21311_02206	DPMP315_00883	methylated-DNA--[protein]-cysteine S-methyltransferase [Pectobacterium]
group_1978	BY21311_03688	DPMP315_02842	UDP-N-acetylmuramoyl-tripeptide--D-alanyl-D-alanine ligase [Pectobacterium]
group_1979	BY21311_01405	DPMP315_00418	3-deoxy-7-phosphoheptulonate synthase AroG [Pectobacterium]
group_198	BY21311_01490	DPMP315_04208	ABC transporter ATP-binding protein [Pectobacterium]
group_1980	BY21311_01967	DPMP315_01583	malate/lactate/ureidoglycolate dehydrogenase [Pectobacterium]
group_1981	BY21311_01294	DPMP315_00307	sigma-70 family RNA polymerase sigma factor [Pectobacterium]
group_1982	BY21311_01321	DPMP315_00334	D-alanyl-D-alanine carboxypeptidase DacA [Pectobacterium]
group_1983	BY21311_03771	DPMP315_02924	phosphoglycerate dehydrogenase [Pectobacterium]
group_1984	BY21311_02693	DPMP315_02294	flagellar basal body rod protein FlgF [Pectobacterium]
group_1985	BY21311_02104	DPMP315_01719	patatin-like phospholipase RssA [Pectobacterium]
group_1986	BY21311_03005	DPMP315_03384	acyl carrier protein [Pectobacterium]
group_1987	BY21311_03386	DPMP315_02145	amino acid ABC transporter permease [Pectobacterium]
group_1988	BY21311_01207	DPMP315_00220	SmdA family multidrug ABC transporter permease/ATP-binding protein [Pectobacterium]
group_1989	BY21311_04080	DPMP315_04055	sugar/pyridoxal phosphate phosphatase YigL [Pectobacterium]
group_199	BY21311_01491	DPMP315_04209	iron ABC transporter permease [Pectobacterium]
group_1990	BY21311_03061	DPMP315_03441	sugar ABC transporter permease [Pectobacterium]
group_1991	BY21311_04325	DPMP315_00638	fatty acid biosynthesis protein FabY [Pectobacterium]
group_1992	BY21311_03496	DPMP315_00793	inorganic diphosphatase [Pectobacterium]
group_1993	BY21311_02004	DPMP315_01620	PD40 domain-containing protein [Pectobacterium]
group_1994	BY21311_04267	DPMP315_00694	YibL family ribosome-associated protein [Pectobacterium]
group_1995	BY21311_00766	DPMP315_02659	transcriptional regulator [Pectobacterium]
group_1996	BY21311_01096	DPMP315_00108	ribosome recycling factor [Pectobacterium]
group_1997	BY21311_02220	DPMP315_00869	ribose-phosphate diphosphokinase [Pectobacterium]
group_1998	BY21311_00262	DPMP315_03047	DNA-directed RNA polymerase subunit beta [Pectobacterium]
group_1999	BY21311_02968	DPMP315_03371	glycoside hydrolase family 28 protein [Pectobacterium]
group_2	BY21311_00459 BY21311_02744 BY21311_00584 BY21311_00920 BY21311_00460 BY21311_02758 BY21311_00576 BY21311_01606 BY21311_02977	DPMP315_03825 DPMP315_03183 DPMP315_04020 DPMP315_04459 DPMP315_04312 DPMP315_02500	integrase arm-type DNA-binding domain-containing protein [Pectobacterium]
group_20	BY21311_03959 BY21311_03961	DPMP315_02453 DPMP315_02454	polysaccharide lyase [Pectobacterium]
group_200	BY21311_01501	DPMP315_04219	alpha/beta hydrolase [Pectobacterium]
group_2000	BY21311_01141	DPMP315_00155	TolC family outer membrane protein [Pectobacterium]
group_2001	BY21311_01198	DPMP315_00211	endopeptidase La [Pectobacterium]
group_2002	BY21311_03320	DPMP315_01383	hypothetical protein
group_2003	BY21311_03293	DPMP315_01361	hypothetical protein [Pectobacterium]
group_2004	BY21311_02112	DPMP315_01727	oligopeptide ABC transporter permease OppB [Pectobacterium]
group_2005	BY21311_01770	DPMP315_03691	LysR family transcriptional regulator [Pectobacterium]
group_2006	BY21311_02679	DPMP315_02308	flagellar basal body-associated protein FliL [Pectobacterium]
group_2007	BY21311_00790	DPMP315_02608	hypothetical protein
group_2008	BY21311_04128	DPMP315_04103	dTDP-4-amino-4,6-dideoxygalactose transaminase [Pectobacterium]
group_2009	BY21311_03606	DPMP315_02760	TerD family protein [Pectobacterium]
group_201	BY21311_01509	DPMP315_04227	LacI family DNA-binding transcriptional regulator [Pectobacterium]
group_2010	BY21311_03523	DPMP315_00768	hypothetical protein
group_2011	BY21311_03804	DPMP315_02956	class 1 fructose-bisphosphatase [Pectobacterium]
group_2012	BY21311_02755	DPMP315_03180	anti-adapter protein IraP [Pectobacterium]
group_2013	BY21311_02288	DPMP315_01842	EAL domain-containing protein [Pectobacterium]
group_2014	BY21311_02714	DPMP315_02273	flagellar transcriptional regulator FlhD [Pectobacterium]
group_2015	BY21311_02566	DPMP315_01227	alpha/beta hydrolase YcfP [Pectobacterium]
group_2016	BY21311_01924	DPMP315_00943	copper homeostasis protein CutC [Pectobacterium]
group_2017	BY21311_04346	DPMP315_03030	ribose ABC transporter substrate-binding protein RbsB [Pectobacteriaceae]
group_2018	BY21311_03897	DPMP315_02391	50S ribosomal protein L17 [Pectobacteriaceae]
group_2019	BY21311_03547	DPMP315_02707	PTS sugar transporter subunit IIB [Pectobacterium]
group_202	BY21311_01513	DPMP315_04231	MFS transporter family glucose-6-phosphate receptor UhpC [Pectobacterium]
group_2020	BY21311_03031	DPMP315_03410	peptidylprolyl isomerase B [Pectobacterium]
group_2021	BY21311_03851	DPMP315_02666	small ribosomal subunit biogenesis GTPase RsgA [Pectobacterium]
group_2022	BY21311_01937	DPMP315_00954	crossover junction endodeoxyribonuclease RuvC [Pectobacterium]
group_2023	BY21311_03175	DPMP315_02173	sigma-E factor regulatory protein RseB [Pectobacterium]
group_2024	BY21311_00652	DPMP315_04396	50S ribosomal protein L27 [Bacteria]
group_2025	BY21311_01992	DPMP315_01608	NADP-dependent isocitrate dehydrogenase [Pectobacterium]
group_2026	BY21311_02278	DPMP315_01832	type III secretion protein [Pectobacterium]
group_2027	BY21311_02499	DPMP315_02541	cytochrome c maturation protein CcmE [Pectobacterium]
group_2028	BY21311_00640	DPMP315_04408	G/U mismatch-specific DNA glycosylase [Pectobacterium]
group_2029	BY21311_04249	DPMP315_00712	rhodanese-like domain-containing protein [Pectobacterium]
group_203	BY21311_01550	DPMP315_04267	type I secretion system permease/ATPase [Pectobacterium]
group_2030	BY21311_02609	DPMP315_01268	hypothetical protein [Pectobacterium]
group_2031	BY21311_01728	DPMP315_03744	cold shock domain-containing protein [Pectobacterium]
group_2032	BY21311_02918	DPMP315_03321	YfcL family protein [Pectobacterium]
group_2033	BY21311_00188	DPMP315_01104	ABC transporter permease subunit [Pectobacterium]
group_2034	BY21311_00086	DPMP315_03137	hypothetical protein
group_2035	BY21311_01899	DPMP315_02333	cell division protein ZapC [Pectobacterium]
group_2036	BY21311_02051	DPMP315_01667	RidA family protein [Pectobacterium]
group_2037	BY21311_03111	DPMP315_03490	outer membrane protein assembly factor BamB [Pectobacterium]
group_2038	BY21311_04217	DPMP315_00740	ABC transporter ATP-binding protein [Pectobacterium]
group_2039	BY21311_02875	DPMP315_03278	NADH-quinone oxidoreductase subunit NuoK [Pectobacterium]
group_204	BY21311_01560	DPMP315_04278	class I SAM-dependent methyltransferase [Pectobacterium]
group_2040	BY21311_01917	DPMP315_00936	multidrug efflux MFS transporter MdtH [Pectobacterium]
group_2041	BY21311_03430	DPMP315_00860	RNA polymerase sigma factor RpoS [Pectobacterium]
group_2042	BY21311_02536	DPMP315_01198	hemin-degrading factor [Pectobacterium]
group_2043	BY21311_03011	DPMP315_03390	hypothetical protein [Pectobacterium]
group_2044	BY21311_02151	DPMP315_01766	L-arabinose isomerase [Pectobacterium]
group_2045	BY21311_01850	DPMP315_03618	bifunctional histidinol-phosphatase/imidazoleglycerol-phosphate dehydratase HisB [Pectobacterium]
group_2046	BY21311_00605	DPMP315_04440	DoxX family protein [Pectobacterium]
group_2047	BY21311_03958	DPMP315_02452	hypothetical protein [Pectobacterium]
group_2048	BY21311_00718	DPMP315_04332	HD domain-containing protein [Pectobacterium]
group_2049	BY21311_04070	DPMP315_04046	PTS sugar transporter subunit IIB [Pectobacterium]
group_205	BY21311_01561	DPMP315_04279	AraC family transcriptional regulator [Pectobacterium]
group_2050	BY21311_03862	DPMP315_02677	elongation factor P [Pectobacterium]
group_2051	BY21311_00352	DPMP315_03910	serine endoprotease DegQ [Pectobacterium]
group_2052	BY21311_02062	DPMP315_01678	YcgN family cysteine cluster protein [Pectobacterium]
group_2053	BY21311_00020	DPMP315_01528	dihydrodipicolinate synthase family protein [Pectobacterium]
group_2054	BY21311_01873	DPMP315_02359	iron chelate uptake ABC transporter family permease subunit [Pectobacterium]
group_2055	BY21311_01949	DPMP315_00966	pyruvate kinase [Pectobacterium]
group_2056	BY21311_00008	DPMP315_01543	MFS transporter [Pectobacterium]
group_2057	BY21311_02938	DPMP315_03341	phospholipid-binding lipoprotein MlaA [Pectobacterium]
group_2058	BY21311_00232	DPMP315_03073	porphobilinogen synthase [Pectobacterium]
group_2059	BY21311_00893	DPMP315_00527	transporter substrate-binding domain-containing protein [Pectobacterium]
group_206	BY21311_01562	DPMP315_04280	hypothetical protein [Pectobacterium]
group_2060	BY21311_00543	DPMP315_01071	molecular chaperone OsmY [Pectobacterium]
group_2061	BY21311_04292	DPMP315_00670	type II toxin-antitoxin system Phd/YefM family antitoxin [Pectobacterium]
group_2062	BY21311_01110	DPMP315_00121	acetyl-CoA carboxylase carboxyl transferase subunit alpha [Pectobacterium]
group_2063	BY21311_00736	DPMP315_04314	LysE family transporter [Pectobacterium]
group_2064	BY21311_00685	DPMP315_04365	purine-nucleoside phosphorylase [Pectobacterium]
group_2065	BY21311_02518	DPMP315_02560	pyruvate kinase PykF [Pectobacterium]
group_2066	BY21311_03969	DPMP315_01411	ABC transporter permease [Pectobacterium]
group_2067	BY21311_03765	DPMP315_02918	trp operon repressor [Pectobacterium]
group_2068	BY21311_00340	DPMP315_03898	LPS export ABC transporter periplasmic protein LptC [Pectobacterium]
group_2069	BY21311_02450	DPMP315_02005	hypothetical protein
group_207	BY21311_01634	DPMP315_02473	malonyl-ACP O-methyltransferase BioC [Pectobacterium]
group_2070	BY21311_03209	DPMP315_02208	LysE family translocator [Pectobacterium]
group_2071	BY21311_02174	DPMP315_00915	bifunctional NADP-dependent 3-hydroxy acid dehydrogenase/3-hydroxypropionate dehydrogenase YdfG [Pectobacterium]
group_2072	BY21311_02050	DPMP315_01666	YoaH family protein [Pectobacterium]
group_2073	BY21311_00360	DPMP315_03918	glutamate synthase small subunit [Pectobacterium]
group_2074	BY21311_03475	DPMP315_00814	2-hydroxy-3-oxopropionate reductase [Pectobacterium]
group_2075	BY21311_04318	DPMP315_00644	DNA-directed RNA polymerase subunit omega [Pectobacteriaceae]
group_2076	BY21311_03745	DPMP315_02898	30S ribosomal protein S20 [Pectobacterium]
group_2077	BY21311_04171	DPMP315_04147	molecular chaperone HscC [Pectobacterium]
group_2078	BY21311_01556	DPMP315_04273	aminobutyraldehyde dehydrogenase [Pectobacterium]
group_2079	BY21311_01209	DPMP315_00222	P-II family nitrogen regulator [Enterobacterales]
dsbC	BY21311_01648	DPMP315_02459	hypothetical protein
group_2080	BY21311_01701	DPMP315_03770	hypothetical protein [Pectobacterium]
group_2081	BY21311_04154	DPMP315_04130	ABC transporter substrate-binding protein [Pectobacterium]
group_2082	BY21311_04115	DPMP315_04090	amino acid ABC transporter substrate-binding protein [Pectobacterium]
group_2083	BY21311_00641	DPMP315_04407	RNA polymerase sigma factor RpoD [Pectobacterium]
group_2084	BY21311_03917	DPMP315_02411	50S ribosomal protein L22 [Pectobacteriaceae]
group_2085	BY21311_01376	DPMP315_00389	pyroglutamyl-peptidase I [Pectobacterium]
group_2086	BY21311_03222	DPMP315_02220	3-methyl-2-oxobutanoate hydroxymethyltransferase [Pectobacterium]
group_2087	BY21311_01781	DPMP315_03680	methionine ABC transporter ATP-binding protein [Pectobacterium]
group_2088	BY21311_03030	DPMP315_03409	DoxX family protein [Pectobacterium]
group_2089	BY21311_02173	DPMP315_00916	hypothetical protein
group_209	BY21311_01675	DPMP315_03796	hypothetical protein [Pectobacterium]
group_2090	BY21311_00341	DPMP315_03899	3-deoxy-manno-octulosonate-8-phosphatase KdsC [Pectobacterium]
group_2091	BY21311_02451	DPMP315_02006	HTH-type transcriptional repressor PurR [Pectobacterium]
group_2092	BY21311_00398	DPMP315_03956	1-acylglycerol-3-phosphate O-acyltransferase [Pectobacterium]
group_2093	BY21311_02677	DPMP315_02310	flagella biosynthesis chaperone FliJ [Pectobacterium]
group_2094	BY21311_01956	DPMP315_00972	hypothetical protein
group_2095	BY21311_03130	DPMP315_03508	Fe-S cluster assembly transcriptional regulator IscR [Pectobacterium]
group_2096	BY21311_03700	DPMP315_02854	2-isopropylmalate synthase [Pectobacterium]
group_2097	BY21311_01378	DPMP315_00391	citrate synthase [Pectobacterium]
group_2098	BY21311_03549	DPMP315_02709	PTS transporter subunit EIIC [Pectobacterium]
group_2099	BY21311_03899	DPMP315_02393	30S ribosomal protein S4 [Pectobacterium]
group_21	BY21311_00108 BY21311_00109	DPMP315_01180	insulinase family protein [Pectobacterium]
group_210	BY21311_01679	DPMP315_03792	ABC transporter permease subunit [Pectobacterium]
group_2100	BY21311_00696	DPMP315_04354	LysR family transcriptional regulator [Pectobacterium]
group_2101	BY21311_04054	DPMP315_03217	sensor histidine kinase [Pectobacterium]
group_2102	BY21311_00544	DPMP315_01072	hypothetical protein
group_2103	BY21311_02957	DPMP315_03360	type II secretion system protein M [Pectobacterium]
group_2104	BY21311_04269	DPMP315_00692	mannitol-1-phosphate 5-dehydrogenase [Pectobacterium]
group_2105	BY21311_01175	DPMP315_00188	bifunctional diaminohydroxyphosphoribosylaminopyrimidine deaminase/5-amino-6-(5-phosphoribosylamino)uracil reductase RibD [Pectobacterium]
group_2106	BY21311_00406	DPMP315_03964	DedA family protein [Pectobacterium]
group_2107	BY21311_04135	DPMP315_04110	transcription termination factor Rho [Pectobacterium]
group_2108	BY21311_01031	DPMP315_00046	membrane-bound lytic murein transglycosylase MltC [Pectobacterium]
group_2109	BY21311_02622	DPMP315_01280	heat shock protein HspQ [Pectobacterium]
group_211	BY21311_01700	DPMP315_03771	Gp37 family protein [Pectobacterium]
group_2110	BY21311_01558	DPMP315_04275	hypothetical protein
group_2111	BY21311_02150	DPMP315_01765	transcription modulator YdgT [Pectobacterium]
group_2112	BY21311_04316	DPMP315_00646	hypothetical protein
group_2113	BY21311_03517	DPMP315_00774	primosomal replication protein N [Pectobacterium]
group_2114	BY21311_03431	DPMP315_00859	murein hydrolase activator NlpD [Pectobacterium]
group_2115	BY21311_01185	DPMP315_00198	YajQ family cyclic di-GMP-binding protein [Pectobacterium]
group_2116	BY21311_02103	DPMP315_01718	YchJ family protein [Pectobacterium]
group_2117	BY21311_03567	DPMP315_02726	tRNA dihydrouridine(20/20a) synthase DusA [Pectobacterium]
group_2118	BY21311_01308	DPMP315_00321	LysR family transcriptional regulator [Pectobacterium]
group_2119	BY21311_01320	DPMP315_00333	hypothetical protein
group_212	BY21311_01705	DPMP315_03766	phage tail tape measure protein [Pectobacterium]
group_2120	BY21311_04219	DPMP315_00738	ABC transporter permease subunit [Pectobacterium]
group_2121	BY21311_01547	DPMP315_04264	anaerobic C4-dicarboxylate transporter [Pectobacterium]
group_2122	BY21311_01040	DPMP315_00055	hypothetical protein
group_2123	BY21311_01804	DPMP315_03662	arginine ABC transporter substrate-binding protein [Pectobacterium]
group_2124	BY21311_01523	DPMP315_04241	methyl-accepting chemotaxis protein [Pectobacterium]
group_2125	BY21311_02183	DPMP315_00906	glycoside hydrolase family 10 protein [Pectobacterium]
group_2126	BY21311_02948	DPMP315_03351	alpha/beta hydrolase [Pectobacterium]
group_2127	BY21311_01939	DPMP315_00956	Holliday junction branch migration DNA helicase RuvB [Pectobacterium]
group_2128	BY21311_04001	DPMP315_01442	two-component system response regulator OmpR [Pectobacteriaceae]
group_2129	BY21311_01105	DPMP315_00116	3-hydroxyacyl-ACP dehydratase FabZ [Pectobacterium]
group_213	BY21311_01709	DPMP315_03762	phage baseplate assembly protein V [Pectobacterium]
group_2131	BY21311_03621	DPMP315_02775	DeoR/GlpR family DNA-binding transcription regulator [Pectobacterium]
group_2132	BY21311_02404	DPMP315_01960	hypothetical protein [Pectobacterium]
group_2133	BY21311_00250	DPMP315_03035	type I pantothenate kinase [Pectobacterium]
group_2134	BY21311_00913	DPMP315_00546	copper-binding periplasmic metallochaperone CueP [Pectobacterium]
group_2135	BY21311_03753	DPMP315_02906	GGDEF domain-containing protein [Pectobacterium]
group_2136	BY21311_02860	DPMP315_03263	NAD(P)H-binding protein [Pectobacterium]
group_2137	BY21311_02525	DPMP315_02567	Fe-S cluster assembly protein SufB [Pectobacterium]
group_2138	BY21311_00330	DPMP315_03888	ribosome-associated protein [Pectobacterium]
group_2139	BY21311_01812	DPMP315_03654	NADH oxidoreductase [Pectobacterium]
group_214	BY21311_01730	DPMP315_03742	YmjA family protein [Pectobacterium]
group_2140	BY21311_01688	DPMP315_03783	ATP-dependent DNA helicase DinG [Pectobacterium]
group_2141	BY21311_03461	DPMP315_00829	MFS transporter [Pectobacterium]
group_2142	BY21311_01923	DPMP315_00942	VOC family protein [Pectobacterium]
group_2143	BY21311_03803	DPMP315_02955	Holliday junction resolvase RuvX [Pectobacterium]
group_2144	BY21311_02713	DPMP315_02274	flagellar transcriptional regulator FlhC [Pectobacterium]
group_2145	BY21311_03196	DPMP315_02195	sulfate ABC transporter permease subunit CysW [Pectobacterium]
group_2146	BY21311_01441	DPMP315_00453	dCTP deaminase [Pectobacterium]
group_2147	BY21311_01279	DPMP315_00292	M48 family metallopeptidase [Pectobacterium]
group_2148	BY21311_01386	DPMP315_00399	succinate--CoA ligase subunit alpha [Pectobacterium]
group_2149	BY21311_01771	DPMP315_03690	methyl-accepting chemotaxis protein [Pectobacterium]
group_215	BY21311_01752	DPMP315_03709	hypothetical protein
group_2150	BY21311_00299	DPMP315_03857	tRNA dihydrouridine synthase DusB [Pectobacterium]
group_2151	BY21311_02946	DPMP315_03349	hypothetical protein [Pectobacterium]
group_2152	BY21311_03294	DPMP315_01362	hypothetical protein [Pectobacterium]
group_2153	BY21311_03967	DPMP315_01409	ABC transporter ATP-binding protein [Pectobacterium]
group_2154	BY21311_02307	DPMP315_01863	o-succinylbenzoate synthase [Pectobacterium]
group_2155	BY21311_02729	DPMP315_02256	hypothetical protein [Pectobacterium]
group_2156	BY21311_03485	DPMP315_00804	hypothetical protein
group_2157	BY21311_02412	DPMP315_01968	L-ribulose-5-phosphate 4-epimerase [Pectobacterium]
group_2158	BY21311_01754	DPMP315_03707	fused PTS fructose transporter subunit IIA/HPr protein [Pectobacterium]
group_2159	BY21311_01919	DPMP315_00938	YceH family protein [Pectobacterium]
group_216	BY21311_01833	DPMP315_03635	LysR family transcriptional regulator [Pectobacterium]
group_2160	BY21311_01306	DPMP315_00319	hypothetical protein
group_2161	BY21311_03287	DPMP315_01352	isocyanide synthase family protein [Pectobacterium]
group_2162	BY21311_02898	DPMP315_03301	dihydroneopterin triphosphate 2'-epimerase [Pectobacterium]
group_2163	BY21311_02548	DPMP315_01210	class I SAM-dependent methyltransferase [Pectobacterium]
group_2164	BY21311_02591	DPMP315_01251	hypothetical protein
group_2165	BY21311_04368	DPMP315_03008	F0F1 ATP synthase subunit beta [Pectobacterium]
group_2166	BY21311_03808	DPMP315_02960	protease modulator HflC [Pectobacterium]
group_2167	BY21311_01187	DPMP315_00200	heme o synthase [Pectobacterium]
group_2168	BY21311_03501	DPMP315_00789	peptide-methionine (S)-S-oxide reductase MsrA [Pectobacterium]
group_2169	BY21311_03565	DPMP315_02724	hypothetical protein [Pectobacterium]
group_217	BY21311_01834	DPMP315_03634	cytosine permease [Pectobacterium]
group_2170	BY21311_01683	DPMP315_03788	beta-glucosidase BglX [Pectobacterium]
group_2171	BY21311_03756	DPMP315_02909	threonine synthase [Pectobacterium]
group_2172	BY21311_03252	DPMP315_01317	ribosome-associated translation inhibitor RaiA [Pectobacterium]
group_2173	BY21311_02186	DPMP315_00902	nuclear transport factor 2 family protein [Pectobacterium]
group_2174	BY21311_00727	DPMP315_04323	site-specific tyrosine recombinase XerD [Pectobacterium]
group_2175	BY21311_04124	DPMP315_04099	lipopolysaccharide N-acetylmannosaminouronosyltransferase [Pectobacterium]
group_2176	BY21311_02088	DPMP315_01703	bifunctional nicotinamidase/pyrazinamidase [Pectobacterium]
group_2177	BY21311_02340	DPMP315_01896	two-component system response regulator NarL [Pectobacteriaceae]
group_2178	BY21311_02204	DPMP315_00884	Gfo/Idh/MocA family oxidoreductase [Pectobacterium]
group_2179	BY21311_01737	DPMP315_03723	50S ribosomal protein L25 [Pectobacterium]
group_218	BY21311_01835	DPMP315_03633	hypothetical protein
group_2180	BY21311_01194	DPMP315_00207	transcriptional regulator BolA [Pectobacterium]
group_2181	BY21311_01980	DPMP315_01596	spermidine/putrescine ABC transporter permease PotC [Pectobacterium]
group_2182	BY21311_02893	DPMP315_03296	phosphate acetyltransferase [Pectobacterium]
group_2183	BY21311_00772	DPMP315_02626	MFS transporter [Pectobacterium]
group_2184	BY21311_04363	DPMP315_03013	F0F1 ATP synthase subunit C [Enterobacterales]
group_2185	BY21311_02106	DPMP315_01721	UTP--glucose-1-phosphate uridylyltransferase GalU [Pectobacterium]
group_2186	BY21311_00442	DPMP315_04004	YhcH/YjgK/YiaL family protein [Pectobacterium]
group_2187	BY21311_02352	DPMP315_01908	two-component system response regulator RstA [Pectobacterium]
group_2188	BY21311_02527	DPMP315_02569	hypothetical protein [Pectobacterium]
group_2189	BY21311_03407	DPMP315_03203	AzlC family ABC transporter permease [Pectobacterium]
group_219	BY21311_01893	DPMP315_02339	porin [Pectobacterium]
group_2190	BY21311_02385	DPMP315_01941	PTS sugar transporter subunit IIB [Pectobacterium]
group_2191	BY21311_02006	DPMP315_01622	YebO family protein [Pectobacterium]
group_2192	BY21311_02120	DPMP315_01735	YciI family protein [Pectobacterium]
group_2193	BY21311_03494	DPMP315_00795	glycerol-3-phosphate 1-O-acyltransferase PlsY [Pectobacterium]
group_2194	BY21311_01945	DPMP315_00962	zinc ABC transporter ATP-binding protein ZnuC [Pectobacterium]
group_2195	BY21311_02108	DPMP315_01723	thymidine kinase [Pectobacterium]
group_2196	BY21311_03261	DPMP315_01326	ribosome maturation factor RimM [Pectobacterium]
group_2197	BY21311_03079	DPMP315_03458	phosphate-starvation-inducible protein PsiE [Pectobacterium]
group_2198	BY21311_00516	DPMP315_01042	ABC transporter substrate-binding protein [Pectobacterium]
group_2199	BY21311_01528	DPMP315_04245	ABC transporter permease [Pectobacterium]
group_22	BY21311_00226 BY21311_00227	DPMP315_03078	ubiquinone biosynthesis regulatory protein kinase UbiB [Pectobacterium]
group_220	BY21311_01902	DPMP315_02330	ABC transporter ATP-binding protein [Pectobacterium]
group_2200	BY21311_03205	DPMP315_02204	iron-sulfur cluster insertion protein ErpA [Pectobacterium]
group_2201	BY21311_01821	DPMP315_03646	translation initiation factor IF-1 [Enterobacterales]
group_2202	BY21311_03769	DPMP315_02922	LysR family transcriptional regulator [Pectobacterium]
group_2203	BY21311_03901	DPMP315_02395	30S ribosomal protein S13 [Pectobacterium]
group_2204	BY21311_03886	DPMP315_02380	shikimate dehydrogenase [Pectobacterium]
group_2205	BY21311_00764	DPMP315_02656	hypothetical protein
group_2206	BY21311_02361	DPMP315_01917	type 1 fimbrial protein [Pectobacterium]
group_2207	BY21311_00051	DPMP315_01497	dipeptide ABC transporter ATP-binding protein [Pectobacterium]
group_2208	BY21311_02927	DPMP315_03330	spore coat U domain-containing protein [Pectobacterium]
group_2209	BY21311_01383	DPMP315_00396	2-oxoglutarate dehydrogenase E1 component [Pectobacterium]
group_221	BY21311_01938	DPMP315_00955	Holliday junction branch migration protein RuvA [Pectobacterium]
group_2210	BY21311_03487	DPMP315_00802	bifunctional D-glycero-beta-D-manno-heptose-7-phosphate kinase/D-glycero-beta-D-manno-heptose 1-phosphate adenylyltransferase HldE [Pectobacterium]
group_2211	BY21311_01717	DPMP315_03754	glutamine ABC transporter permease GlnP [Pectobacterium]
group_2212	BY21311_03697	DPMP315_02851	acetolactate synthase small subunit [Pectobacterium]
group_2213	BY21311_03806	DPMP315_02958	adenylosuccinate synthase [Pectobacterium]
group_2214	BY21311_03981	DPMP315_01423	phosphoglycolate phosphatase [Pectobacterium]
group_2215	BY21311_03604	DPMP315_02758	VWA domain-containing protein [Pectobacterium]
group_2216	BY21311_03193	DPMP315_02192	TetR/AcrR family transcriptional regulator [Pectobacterium]
group_2217	BY21311_02212	DPMP315_00877	3-deoxy-8-phosphooctulonate synthase [Pectobacterium]
group_2218	BY21311_01409	DPMP315_00422	2,3-diphosphoglycerate-dependent phosphoglycerate mutase [Pectobacterium]
group_2219	BY21311_02555	DPMP315_01217	lipoprotein-releasing ABC transporter ATP-binding protein LolD [Pectobacterium]
group_222	BY21311_01961	DPMP315_03567	hypothetical protein [Pectobacterium]
group_2220	BY21311_00852	DPMP315_00489	phosphoenolpyruvate-protein phosphotransferase PtsI [Pectobacterium]
group_2221	BY21311_03477	DPMP315_00812	glucarate dehydratase [Pectobacterium]
group_2222	BY21311_02902	DPMP315_03305	histidine ABC transporter permease HisQ [Pectobacterium]
group_2223	BY21311_02178	DPMP315_00911	tautomerase PptA [Pectobacterium]
group_2224	BY21311_00208	DPMP315_03096	hypothetical protein
group_2225	BY21311_03651	DPMP315_02805	metalloregulator ArsR/SmtB family transcription factor [Pectobacterium]
group_2226	BY21311_03275	DPMP315_01340	recombination regulator RecX [Pectobacterium]
group_2227	BY21311_01077	DPMP315_00089	transcriptional regulator GcvA [Pectobacterium]
group_2228	BY21311_00004	DPMP315_01547	DNA topoisomerase (ATP-hydrolyzing) subunit B [Pectobacterium]
group_2229	BY21311_02934	DPMP315_03337	YfcZ/YiiS family protein [Pectobacterium]
group_223	BY21311_01977	DPMP315_01593	helix-turn-helix transcriptional regulator [Pectobacterium]
group_2230	BY21311_02311	DPMP315_01867	phosphatase PAP2 family protein [Pectobacterium]
group_2231	BY21311_01767	DPMP315_03694	glutathione S-transferase [Pectobacterium]
group_2232	BY21311_03971	DPMP315_01413	mandelate racemase family protein [Pectobacterium]
group_2233	BY21311_04037	DPMP315_01478	YhcH/YjgK/YiaL family protein [Pectobacterium]
group_2234	BY21311_04117	DPMP315_04092	adenylosuccinate lyase [Pectobacterium]
group_2235	BY21311_03915	DPMP315_02409	50S ribosomal protein L16 [Pectobacteriaceae]
group_2236	BY21311_02631	DPMP315_01289	porin OmpA [Pectobacterium]
group_2237	BY21311_03674	DPMP315_02828	8-oxo-dGTP diphosphatase MutT [Pectobacterium]
group_2238	BY21311_03535	DPMP315_00757	hypothetical protein
group_2239	BY21311_03362	DPMP315_02121	sigma factor-binding protein Crl [Pectobacterium]
group_224	BY21311_02016	DPMP315_01632	ABC transporter ATP-binding protein/permease [Pectobacterium]
group_2240	BY21311_00990	DPMP315_00030	hypothetical protein
group_2241	BY21311_01122	DPMP315_00137	Fe(3+) dicitrate ABC transporter substrate-binding protein FecB [Pectobacterium]
group_2242	BY21311_03571	DPMP315_02730	alanine racemase [Pectobacterium]
group_2243	BY21311_01970	DPMP315_01586	YebW family protein [Pectobacterium]
group_2244	BY21311_00782	DPMP315_02616	glycoside-pentoside-hexuronide (GPH):cation symporter [Pectobacterium]
group_2245	BY21311_03374	DPMP315_02133	HNH nuclease YajD [Pectobacterium]
group_2246	BY21311_02502	DPMP315_02544	heme exporter protein CcmB [Pectobacterium]
group_2247	BY21311_00104	DPMP315_01184	cellulose biosynthesis protein BcsF [Pectobacterium]
group_2248	BY21311_00693	DPMP315_04357	DNA polymerase III subunit psi [Pectobacterium]
group_2249	BY21311_00734	DPMP315_04316	helix-turn-helix transcriptional regulator [Pectobacterium]
group_225	BY21311_02040	DPMP315_01656	23S rRNA (guanine(745)-N(1))-methyltransferase [Pectobacterium]
group_2250	BY21311_01177	DPMP315_00190	transcription antitermination factor NusB [Pectobacterium]
group_2251	BY21311_03109	DPMP315_03488	AEC family transporter [Pectobacterium]
group_2252	BY21311_01673	DPMP315_03798	class IV adenylate cyclase [Pectobacterium]
group_2253	BY21311_04137	DPMP315_04112	ATP-dependent RNA helicase RhlB [Pectobacterium]
group_2254	BY21311_04329	DPMP315_00634	glutamate--ammonia ligase [Pectobacterium]
group_2255	BY21311_00206	DPMP315_03098	sugar ABC transporter permease YjfF [Pectobacterium]
group_2256	BY21311_01210	DPMP315_00223	ammonium transporter AmtB [Pectobacterium]
group_2257	BY21311_02176	DPMP315_00913	helix-turn-helix domain-containing protein [Pectobacterium]
group_2258	BY21311_03515	DPMP315_00776	50S ribosomal protein L9 [Pectobacterium]
group_2259	BY21311_02582	DPMP315_01242	acyl carrier protein [Bacteria]
group_226	BY21311_02073	DPMP315_01688	hypothetical protein [Pectobacterium]
group_2260	BY21311_00885	DPMP315_00520	GNAT family N-acetyltransferase [Pectobacterium]
group_2261	BY21311_02019	DPMP315_01635	osmotically-inducible lipoprotein OsmE [Pectobacterium]
group_2262	BY21311_03159	DPMP315_03535	tryptophan synthase subunit beta [Pectobacterium]
group_2263	BY21311_00115	DPMP315_01174	sulfurtransferase TusA [Pectobacterium]
group_2264	BY21311_03365	DPMP315_02124	xanthine phosphoribosyltransferase [Pectobacterium]
group_2265	BY21311_00154	DPMP315_01138	tRNA (cytidine(34)-2'-O)-methyltransferase [Pectobacterium]
group_2266	BY21311_03227	DPMP315_02225	carbonate dehydratase [Pectobacterium]
group_2267	BY21311_00740	DPMP315_02632	NCS2 family permease [Pectobacterium]
group_2268	BY21311_03912	DPMP315_02406	50S ribosomal protein L14 [Bacteria]
group_2269	BY21311_03504	DPMP315_00787	hypothetical protein
group_227	BY21311_02099	DPMP315_01714	hypothetical protein [Pectobacterium]
group_2270	BY21311_00752	DPMP315_02644	type II secretion system F family protein [Pectobacterium]
group_2271	BY21311_03823	DPMP315_02975	HlyD family efflux transporter periplasmic adaptor subunit [Pectobacterium]
group_2272	BY21311_00256	DPMP315_03041	preprotein translocase subunit SecE [Pectobacterium]
group_2273	BY21311_04396	DPMP315_01568	CsgG/HfaB family protein [Pectobacterium]
group_2274	BY21311_02372	DPMP315_01928	hypothetical protein [Pectobacterium]
group_2275	BY21311_01903	DPMP315_02329	membrane integrity-associated transporter subunit PqiA [Pectobacterium]
group_2276	BY21311_01680	DPMP315_03791	ABC transporter ATP-binding protein [Pectobacterium]
group_2277	BY21311_00336	DPMP315_03894	ribosome hibernation promoting factor [Pectobacterium]
group_2278	BY21311_03090	DPMP315_03469	hypothetical protein
group_2279	BY21311_03425	DPMP315_00865	methionine ABC transporter permease MetI [Pectobacterium]
group_228	BY21311_02100	DPMP315_01715	hypothetical protein
group_2280	BY21311_02890	DPMP315_03293	YfbU family protein [Pectobacterium]
group_2281	BY21311_03381	DPMP315_02140	amidohydrolase [Pectobacterium]
group_2282	BY21311_04360	DPMP315_03016	16S rRNA (guanine(527)-N(7))-methyltransferase RsmG [Pectobacterium]
group_2283	BY21311_02047	DPMP315_01663	L-serine ammonia-lyase [Pectobacterium]
group_2284	BY21311_03776	DPMP315_02929	IclR family transcriptional regulator [Pectobacterium]
group_2285	BY21311_02023	DPMP315_01639	porin [Pectobacterium]
group_2286	BY21311_01326	DPMP315_00339	ribosome silencing factor [Pectobacterium]
group_2287	BY21311_02343	DPMP315_01899	gamma-glutamylcyclotransferase [Pectobacterium]
group_2288	BY21311_02265	DPMP315_01819	porin [Pectobacterium]
group_229	BY21311_02166	DPMP315_00923	MFS transporter [Pectobacterium]
group_2290	BY21311_00171	DPMP315_01121	1,4-dihydroxy-2-naphthoate polyprenyltransferase [Pectobacterium]
group_2291	BY21311_03584	DPMP315_02739	single-stranded DNA-binding protein SSB1 [Pectobacterium]
group_2292	BY21311_01046	DPMP315_00060	thymidylate synthase [Pectobacterium]
group_2293	BY21311_00814	DPMP315_02589	extracellular solute-binding protein [Pectobacterium]
group_2294	BY21311_00035	DPMP315_01513	PTS sugar transporter subunit IIC [Pectobacterium]
group_2295	BY21311_02552	DPMP315_01214	NAD-dependent protein deacylase [Pectobacterium]
group_2296	BY21311_00855	DPMP315_00492	sulfate transporter CysZ [Pectobacterium]
group_2297	BY21311_02139	DPMP315_01754	YciN family protein [Pectobacterium]
group_2298	BY21311_02961	DPMP315_03364	type II secretion system minor pseudopilin GspI [Pectobacterium]
group_2299	BY21311_04095	DPMP315_04070	diaminopimelate epimerase [Pectobacterium]
group_23	BY21311_00237 BY21311_04380	DPMP315_03068	amino acid ABC transporter ATP-binding protein [Pectobacterium]
group_230	BY21311_02170	DPMP315_00919	MFS transporter [Pectobacterium]
group_2300	BY21311_02709	DPMP315_02278	chemotaxis protein CheW [Pectobacterium]
group_2301	BY21311_01148	DPMP315_00162	nucleoside permease [Pectobacterium]
group_2302	BY21311_03819	DPMP315_02971	alkyl hydroperoxide reductase subunit C [Pectobacterium]
group_2303	BY21311_01983	DPMP315_01599	peptidase T [Pectobacterium]
group_2304	BY21311_00616	DPMP315_04429	altronate dehydratase family protein [Pectobacterium]
group_2305	BY21311_01191	DPMP315_00204	cytochrome o ubiquinol oxidase subunit II [Pectobacterium]
group_2306	BY21311_01626	DPMP315_02481	NAD-dependent malic enzyme [Pectobacterium]
group_2307	BY21311_03997	DPMP315_01438	ribosome-associated heat shock protein Hsp15 [Pectobacterium]
group_2308	BY21311_03264	DPMP315_01329	inner membrane protein YpjD [Pectobacterium]
group_2309	BY21311_04406	DPMP315_01558	helix-turn-helix transcriptional regulator [Pectobacterium]
group_231	BY21311_02181	DPMP315_00908	hypothetical protein
group_2310	BY21311_01146	DPMP315_00160	pyrimidine/purine nucleoside phosphorylase [Pectobacterium]
group_2311	BY21311_00071	DPMP315_03150	Hcp family type VI secretion system effector [Pectobacterium]
group_2312	BY21311_03512	DPMP315_00779	hypothetical protein
group_2313	BY21311_03904	DPMP315_02398	50S ribosomal protein L15 [Pectobacterium]
group_2314	BY21311_02039	DPMP315_01655	transcription antiterminator/RNA stability regulator CspE [Proteobacteria]
group_2315	BY21311_00316	DPMP315_03874	protein-methionine-sulfoxide reductase catalytic subunit MsrP [Pectobacterium]
group_2316	BY21311_01328	DPMP315_00341	DNA polymerase III subunit delta [Pectobacterium]
group_2317	BY21311_02123	DPMP315_01738	septation protein A [Pectobacterium]
group_2318	BY21311_03448	DPMP315_00842	PilZ domain-containing protein [Pectobacterium]
group_2319	BY21311_02643	DPMP315_01301	Flp family type IVb pilin [Pectobacterium]
group_232	BY21311_02226	DPMP315_01778	hypothetical protein
group_2320	BY21311_03932	DPMP315_02426	sulfurtransferase complex subunit TusC [Pectobacterium]
group_2321	BY21311_02952	DPMP315_03355	iron ABC transporter permease [Pectobacterium]
group_2322	BY21311_04341	DPMP315_00622	molybdopterin-guanine dinucleotide biosynthesis protein MobB [Pectobacterium]
group_2323	BY21311_00802	DPMP315_02601	RnfH family protein [Pectobacterium]
group_2324	BY21311_02505	DPMP315_02547	heme lyase NrfEFG subunit NrfF [Pectobacterium]
group_2325	BY21311_01583	DPMP315_04301	chemotaxis protein [Pectobacterium]
group_2326	BY21311_02868	DPMP315_03271	hypothetical protein
group_2327	BY21311_00338	DPMP315_03896	LPS export ABC transporter ATP-binding protein [Pectobacterium]
group_2328	BY21311_02561	DPMP315_01222	molecular chaperone [Pectobacterium]
group_2329	BY21311_03665	DPMP315_02819	nucleoside-specific channel-forming protein Tsx [Pectobacterium]
dmlR	BY21311_02227	DPMP315_01779	HTH-type transcriptional regulator DmlR
group_2330	BY21311_03984	DPMP315_01426	SPOR domain-containing protein [Pectobacterium]
group_2331	BY21311_00258	DPMP315_03043	50S ribosomal protein L11 [Pectobacterium]
group_2332	BY21311_00785	DPMP315_02613	LysE family transporter [Pectobacterium]
group_2333	BY21311_00636	DPMP315_04412	hypothetical protein
group_2334	BY21311_01380	DPMP315_00393	succinate dehydrogenase membrane anchor subunit [Pectobacterium]
group_2335	BY21311_04021	DPMP315_01462	ABC transporter ATP-binding protein [Pectobacterium]
group_2336	BY21311_01125	DPMP315_00140	sigma-70 family RNA polymerase sigma factor [Pectobacterium]
group_2337	BY21311_01645	DPMP315_02462	molybdopterin synthase sulfur carrier subunit [Pectobacterium]
group_2338	BY21311_00827	DPMP315_02576	triose-phosphate isomerase [Pectobacterium]
group_2339	BY21311_02169	DPMP315_00920	dethiobiotin synthase [Pectobacterium]
group_234	BY21311_02230	DPMP315_01782	RNA ligase family protein [Pectobacterium]
group_2340	BY21311_01795	DPMP315_03665	putrescine ABC transporter permease PotI [Pectobacterium]
group_2341	BY21311_02492	DPMP315_02534	quinol dehydrogenase ferredoxin subunit NapH [Pectobacterium]
group_2342	BY21311_00445	DPMP315_04006	ornithine carbamoyltransferase [Pectobacterium]
group_2343	BY21311_02355	DPMP315_01911	helix-turn-helix domain-containing protein [Pectobacterium]
group_2344	BY21311_00843	DPMP315_00479	sulfate ABC transporter substrate-binding protein [Pectobacterium]
group_2345	BY21311_00775	DPMP315_02623	aminotransferase class I/II-fold pyridoxal phosphate-dependent enzyme [Pectobacterium]
group_2346	BY21311_02818	DPMP315_03122	amino acid ABC transporter ATP-binding protein [Pectobacterium]
group_2347	BY21311_02682	DPMP315_02305	flagellar biosynthetic protein FliO [Pectobacterium]
group_2348	BY21311_01370	DPMP315_00383	2-thiouracil desulfurase family protein [Pectobacterium]
group_2349	BY21311_03615	DPMP315_02769	TerD family protein [Pectobacterium]
group_235	BY21311_02233	DPMP315_01785	hypothetical protein [Pectobacterium]
group_2350	BY21311_04330	DPMP315_00633	nitrogen regulation protein NR(II) [Pectobacterium]
group_2351	BY21311_00390	DPMP315_03947	fructose PTS transporter subunit IIB [Pectobacterium]
group_2352	BY21311_03856	DPMP315_02671	succinate dehydrogenase/fumarate reductase iron-sulfur subunit [Pectobacterium]
group_2353	BY21311_00659	DPMP315_04389	ATP-dependent zinc metalloprotease FtsH [Pectobacterium]
group_2354	BY21311_00081	DPMP315_03141	hypothetical protein [Pectobacterium]
group_2355	BY21311_03671	DPMP315_02825	dephospho-CoA kinase [Pectobacterium]
group_2356	BY21311_01892	DPMP315_02340	aspartate/tyrosine/aromatic aminotransferase [Pectobacterium]
group_2357	BY21311_01837	DPMP315_03631	pyruvate formate lyase 1-activating protein [Pectobacterium]
group_2358	BY21311_03788	DPMP315_02941	small-conductance mechanosensitive channel MscS [Pectobacterium]
group_2359	BY21311_00219	DPMP315_03085	acetylornithine deacetylase [Pectobacterium]
group_236	BY21311_02234	DPMP315_01786	VOC family protein [Pectobacterium]
group_2360	BY21311_03562	DPMP315_02721	MBL fold metallo-hydrolase [Pectobacterium]
group_2361	BY21311_01418	DPMP315_00431	molybdenum-dependent transcriptional regulator [Pectobacterium]
group_2362	BY21311_03951	DPMP315_02445	phosphoribulokinase [Pectobacterium]
group_2363	BY21311_01721	DPMP315_03750	threonine/homoserine exporter RhtA [Pectobacterium]
group_2364	BY21311_03371	DPMP315_02130	class II glutamine amidotransferase [Pectobacterium]
group_2365	BY21311_01229	DPMP315_00242	adenylate kinase [Pectobacterium]
group_2366	BY21311_00666	DPMP315_04383	ribosome maturation factor RimP [Pectobacterium]
group_2367	BY21311_02156	DPMP315_01771	arabinose operon transcriptional regulator AraC [Pectobacterium]
group_2368	BY21311_03016	DPMP315_03395	iron ABC transporter permease [Pectobacterium]
group_2369	BY21311_00993	DPMP315_00033	alpha/beta hydrolase [Pectobacterium]
group_237	BY21311_02235	DPMP315_01787	histidinol-phosphatase [Pectobacterium]
group_2370	BY21311_03574	DPMP315_02733	Lrp/AsnC family transcriptional regulator [Pectobacterium]
group_2371	BY21311_02417	DPMP315_01973	LapA family protein [Pectobacterium]
group_2372	BY21311_02058	DPMP315_01674	septum site-determining protein MinD [Pectobacterium]
group_2373	BY21311_02531	DPMP315_02573	FAD:protein FMN transferase ApbE [Pectobacterium]
group_2374	BY21311_00368	DPMP315_03925	divisome-associated lipoprotein YraP [Pectobacterium]
group_2375	BY21311_01849	DPMP315_03619	imidazole glycerol phosphate synthase subunit HisH [Pectobacterium]
group_2376	BY21311_01973	DPMP315_01589	membrane integrity lipid transport subunit YebS [Pectobacterium]
group_2377	BY21311_01213	DPMP315_00226	MGMT family protein [Pectobacterium]
group_2378	BY21311_03038	DPMP315_03417	hypothetical protein [Pectobacterium]
group_2379	BY21311_03858	DPMP315_02673	fumarate reductase subunit FrdD [Pectobacterium]
group_238	BY21311_02238	DPMP315_01790	LacI family DNA-binding transcriptional regulator [Pectobacterium]
group_2380	BY21311_03202	DPMP315_02201	5'-methylthioadenosine/S-adenosylhomocysteine nucleosidase [Pectobacterium]
group_2381	BY21311_01950	DPMP315_00967	MurR/RpiR family transcriptional regulator [Pectobacterium]
group_2382	BY21311_03136	DPMP315_03514	hypothetical protein [Pectobacterium]
group_2383	BY21311_02816	DPMP315_03120	amino acid ABC transporter permease [Pectobacterium]
group_2384	BY21311_00690	DPMP315_04360	discoidin domain-containing protein [Pectobacterium]
group_2385	BY21311_00101	DPMP315_01187	cellulose biosynthesis protein BcsQ [Pectobacterium]
group_2386	BY21311_01438	DPMP315_00451	iron-sulfur cluster carrier protein ApbC [Pectobacterium]
group_2387	BY21311_04299	DPMP315_00663	sigma-70 family RNA polymerase sigma factor [Pectobacterium]
group_2388	BY21311_01817	DPMP315_03649	ATP-dependent Clp protease adapter ClpS [Pectobacterium]
group_2389	BY21311_03234	DPMP315_02232	adenosylmethionine decarboxylase [Pectobacterium]
group_239	BY21311_02297	DPMP315_01851	type III secretion protein [Pectobacterium]
group_2390	BY21311_02522	DPMP315_02564	cysteine desulfurase SufS [Pectobacterium]
group_2391	BY21311_04174	DPMP315_04150	dienelactone hydrolase family protein [Pectobacterium]
group_2392	BY21311_00447	DPMP315_04008	GNAT family N-acetyltransferase [Pectobacterium]
group_2393	BY21311_02357	DPMP315_01913	fimbrial protein [Pectobacterium]
group_2394	BY21311_01134	DPMP315_00148	SiaB family protein kinase [Pectobacterium]
group_2395	BY21311_03113	DPMP315_03492	histidine--tRNA ligase [Pectobacterium]
group_2396	BY21311_02053	DPMP315_01669	tRNA (adenosine(37)-N6)-threonylcarbamoyltransferase complex dimerization subunit type 1 TsaB [Pectobacterium]
group_2397	BY21311_02292	DPMP315_01846	RNA polymerase sigma factor [Pectobacterium]
group_2398	BY21311_01356	DPMP315_00369	flavodoxin FldA [Pectobacterium]
group_2399	BY21311_02435	DPMP315_01991	hypothetical protein
group_24	BY21311_00285 BY21311_04342	DPMP315_00621	hypothetical protein
group_240	BY21311_02327	DPMP315_01883	helix-turn-helix transcriptional regulator [Pectobacterium]
group_2400	BY21311_03617	DPMP315_02771	TerC/Alx family metal homeostasis membrane protein [Pectobacterium]
group_2401	BY21311_00722	DPMP315_04328	protein YgfX [Pectobacterium]
group_2402	BY21311_01784	DPMP315_03677	DNA-binding transcriptional repressor DeoR [Pectobacterium]
group_2403	BY21311_01218	DPMP315_00231	efflux RND transporter permease subunit [Pectobacterium]
group_2404	BY21311_03257	DPMP315_01322	hypothetical protein
group_2405	BY21311_03337	DPMP315_01399	type VI secretion system lipoprotein TssJ [Pectobacterium]
group_2406	BY21311_00124	DPMP315_01165	RNA polymerase sigma factor RpoH [Pectobacterium]
group_2407	BY21311_01114	DPMP315_00125	YaeP family protein [Pectobacterium]
group_2408	BY21311_00848	DPMP315_00484	efflux RND transporter periplasmic adaptor subunit [Pectobacterium]
group_2409	BY21311_01369	DPMP315_00382	YbfA family protein [Pectobacterium]
group_241	BY21311_02389	DPMP315_01945	envelope stress response membrane protein PspC [Pectobacterium]
group_2410	BY21311_03029	DPMP315_03408	cysteine--tRNA ligase [Pectobacterium]
group_2411	BY21311_03692	DPMP315_02846	16S rRNA (cytosine(1402)-N(4))-methyltransferase RsmH [Pectobacterium]
group_2412	BY21311_01082	DPMP315_00094	NADPH-dependent 7-cyano-7-deazaguanine reductase QueF [Pectobacterium]
ykgO	BY21311_01216	DPMP315_00229	50S ribosomal protein L36 2
group_2414	BY21311_00228	DPMP315_03077	Sec-independent protein translocase subunit TatA [Pectobacterium]
group_2415	BY21311_00344	DPMP315_03902	phospholipid ABC transporter ATP-binding protein MlaF [Pectobacterium]
group_2416	BY21311_01712	DPMP315_03759	phage tail protein I [Pectobacterium]
group_2417	BY21311_03637	DPMP315_02790	D-allulose 6-phosphate 3-epimerase [Pectobacterium]
group_2418	BY21311_03482	DPMP315_00807	PAS domain-containing methyl-accepting chemotaxis protein [Pectobacterium]
group_2419	BY21311_02922	DPMP315_03325	chorismate synthase [Pectobacterium]
group_242	BY21311_02402	DPMP315_01958	hypothetical protein [Pectobacterium]
group_2420	BY21311_03703	DPMP315_02857	3-isopropylmalate dehydratase small subunit [Pectobacterium]
group_2421	BY21311_03013	DPMP315_03392	cupin domain-containing protein [Pectobacterium]
group_2422	BY21311_02153	DPMP315_01768	arabinose ABC transporter substrate-binding protein [Pectobacterium]
group_2423	BY21311_01238	DPMP315_00250	glycoside hydrolase family 28 protein [Pectobacterium]
group_2424	BY21311_03434	DPMP315_00856	2-C-methyl-D-erythritol 2,4-cyclodiphosphate synthase [Pectobacterium]
group_2425	BY21311_01358	DPMP315_00371	LexA regulated protein [Pectobacterium]
group_2426	BY21311_01976	DPMP315_01592	carboxy terminal-processing peptidase [Pectobacterium]
group_2427	BY21311_00439	DPMP315_04001	2-iminobutanoate/2-iminopropanoate deaminase [Pectobacterium]
group_2428	BY21311_03783	DPMP315_02936	MFS transporter [Pectobacterium]
group_2429	BY21311_02346	DPMP315_01902	C4-dicarboxylic acid transporter DauA [Pectobacterium]
group_243	BY21311_02418	DPMP315_01974	sugar-binding transcriptional regulator [Pectobacterium]
group_2430	BY21311_00456	DPMP315_04017	LPS export ABC transporter permease LptF [Pectobacterium]
group_2431	BY21311_03367	DPMP315_02126	DNA polymerase IV [Pectobacterium]
group_2432	BY21311_01043	DPMP315_00058	phosphoenolpyruvate--protein phosphotransferase [Pectobacterium]
group_2433	BY21311_03921	DPMP315_02415	50S ribosomal protein L4 [Pectobacterium]
group_2434	BY21311_03225	DPMP315_02223	ABC transporter permease [Pectobacterium]
group_2435	BY21311_00613	DPMP315_04432	MFS transporter [Pectobacterium]
group_2436	BY21311_01865	DPMP315_02367	citrate lyase subunit alpha [Pectobacterium]
group_2437	BY21311_02128	DPMP315_01743	tryptophan synthase subunit beta [Pectobacterium]
group_2438	BY21311_03443	DPMP315_00847	sulfate adenylyltransferase subunit CysD [Pectobacterium]
group_2439	BY21311_02691	DPMP315_02296	flagellar basal body L-ring protein FlgH [Pectobacterium]
group_244	BY21311_02431	DPMP315_01987	hypothetical protein
group_2440	BY21311_01639	DPMP315_02468	glyoxalase [Pectobacterium]
group_2441	BY21311_02026	DPMP315_01642	carbohydrate ABC transporter permease [Pectobacterium]
group_2442	BY21311_03773	DPMP315_02926	LysR family transcriptional regulator ArgP [Pectobacterium]
group_2443	BY21311_03427	DPMP315_00863	Rcs stress response system protein RcsF [Pectobacterium]
group_2444	BY21311_01290	DPMP315_00303	biopolymer transporter ExbD [Pectobacterium]
group_2445	BY21311_02401	DPMP315_01957	enoyl-ACP reductase FabI [Pectobacterium]
group_2446	BY21311_03826	DPMP315_02978	ABC transporter ATP-binding protein [Pectobacterium]
group_2447	BY21311_02045	DPMP315_01661	PTS mannose transporter subunit IIAB [Pectobacterium]
group_2448	BY21311_01906	DPMP315_02326	ribosome modulation factor [Pectobacterium]
group_2449	BY21311_01588	DPMP315_04306	NAD(P)-dependent oxidoreductase [Pectobacterium]
gltR	BY21311_02463	DPMP315_02015	HTH-type transcriptional regulator GltR
group_2450	BY21311_00333	DPMP315_03891	PTS phosphocarrier protein NPr [Pectobacterium]
group_2451	BY21311_04208	DPMP315_00749	50S ribosomal protein L28 [Pectobacterium]
group_2452	BY21311_03742	DPMP315_02895	signal peptidase II [Pectobacterium]
group_2453	BY21311_02267	DPMP315_01821	extracellular solute-binding protein [Pectobacterium]
group_2454	BY21311_02180	DPMP315_00909	diaminobutyrate--2-oxoglutarate transaminase [Pectobacterium]
group_2455	BY21311_02907	DPMP315_03310	cell division protein DedD [Pectobacterium]
group_2456	BY21311_00037	DPMP315_01511	hypothetical protein
group_2457	BY21311_02325	DPMP315_01881	hypothetical protein [Pectobacterium]
group_2458	BY21311_04097	DPMP315_04072	iron donor protein CyaY [Pectobacterium]
group_2459	BY21311_03995	DPMP315_01436	intracellular growth attenuator family protein [Pectobacterium]
group_246	BY21311_02480	DPMP315_02020	DeoR/GlpR family DNA-binding transcription regulator [Pectobacterium]
group_2460	BY21311_02080	DPMP315_01695	YeaH/YhbH family protein [Pectobacterium]
group_2461	BY21311_04104	DPMP315_04079	GntR family transcriptional regulator [Pectobacterium]
group_2462	BY21311_02625	DPMP315_01283	methylglyoxal synthase [Pectobacterium]
group_2463	BY21311_04132	DPMP315_04107	UDP-N-acetylglucosamine 2-epimerase (non-hydrolyzing) [Pectobacterium]
group_2464	BY21311_01920	DPMP315_00939	Gfo/Idh/MocA family oxidoreductase [Pectobacterium]
group_2465	BY21311_00192	DPMP315_01100	DNA-binding transcriptional regulator OxyR [Pectobacterium]
group_2466	BY21311_01619	DPMP315_02488	nitroreductase family protein [Pectobacterium]
group_2467	BY21311_01172	DPMP315_00185	protein translocase subunit SecF [Pectobacterium]
group_2468	BY21311_00313	DPMP315_03871	acetyl-CoA carboxylase biotin carboxyl carrier protein [Pectobacterium]
group_2469	BY21311_03163	DPMP315_02161	HlyD family type I secretion periplasmic adaptor subunit [Pectobacterium]
group_247	BY21311_02481	DPMP315_02021	HAD-IIB family hydrolase [Pectobacterium]
group_2470	BY21311_04184	DPMP315_04160	rhodanese-like domain-containing protein [Pectobacterium]
group_2471	BY21311_03667	DPMP315_02821	prepilin peptidase-dependent pilin [Pectobacterium]
group_2472	BY21311_02594	DPMP315_01254	dihydroorotase [Pectobacterium]
group_2473	BY21311_02126	DPMP315_01741	porin [Pectobacterium]
group_2474	BY21311_02646	DPMP315_01304	flagella biosynthesis regulatory protein FliZ [Pectobacterium]
group_2475	BY21311_00787	DPMP315_02611	hypothetical protein
group_2476	BY21311_01259	DPMP315_00271	1,4-dihydroxy-2-naphthoyl-CoA synthase [Pectobacterium]
group_2477	BY21311_00017	DPMP315_01535	sugar-phosphatase [Pectobacterium]
group_2478	BY21311_02224	DPMP315_01776	surface-adhesin E family protein [Pectobacterium]
group_2479	BY21311_01339	DPMP315_00352	PhoH family protein [Pectobacterium]
group_248	BY21311_02482	DPMP315_02022	multidrug efflux SMR transporter [Pectobacterium]
group_2480	BY21311_01127	DPMP315_00142	alkylphosphonate utilization protein [Pectobacterium]
group_2481	BY21311_01751	DPMP315_03710	elongation factor P-like protein YeiP [Pectobacterium]
group_2482	BY21311_03880	DPMP315_02697	homoserine O-succinyltransferase [Pectobacterium]
group_2483	BY21311_01667	DPMP315_03804	ABC transporter substrate-binding protein [Pectobacterium]
group_2484	BY21311_02579	DPMP315_01239	endolytic transglycosylase MltG [Pectobacterium]
group_2485	BY21311_01163	DPMP315_00176	proline-specific permease ProY [Pectobacterium]
group_2486	BY21311_00334	DPMP315_03892	RNase adapter RapZ [Pectobacterium]
group_2487	BY21311_01880	DPMP315_02352	hypothetical protein [Pectobacterium]
group_2488	BY21311_03127	DPMP315_03505	iron-sulfur cluster assembly protein IscA [Pectobacterium]
group_2489	BY21311_03339	DPMP315_01401	type VI secretion system baseplate subunit TssG [Pectobacterium]
group_249	BY21311_02485	DPMP315_02527	AEC family transporter [Pectobacterium]
group_2490	BY21311_04412	DPMP315_01552	hypothetical protein
group_2491	BY21311_03143	DPMP315_03521	NO-inducible flavohemoprotein [Pectobacterium]
group_2492	BY21311_00215	DPMP315_03089	threonine ammonia-lyase, biosynthetic [Pectobacterium]
group_2493	BY21311_02428	DPMP315_01984	phosphatidylglycerophosphatase B [Pectobacterium]
group_2494	BY21311_03259	DPMP315_01324	50S ribosomal protein L19 [Pectobacterium]
group_2495	BY21311_04307	DPMP315_00655	universal stress protein UspB [Pectobacterium]
group_2496	BY21311_01324	DPMP315_00337	peptidoglycan DD-transpeptidase MrdA [Pectobacterium]
group_2497	BY21311_01248	DPMP315_00260	ribonucleotide-diphosphate reductase subunit beta [Pectobacterium]
group_2498	BY21311_00382	DPMP315_03939	3',5'-cyclic-AMP phosphodiesterase [Pectobacterium]
group_2499	BY21311_01291	DPMP315_00304	MotA/TolQ/ExbB proton channel family protein [Pectobacterium]
group_25	BY21311_00363 BY21311_00364	DPMP315_03921	aerobic respiration two-component sensor histidine kinase ArcB [Pectobacterium]
group_250	BY21311_02496	DPMP315_02538	cytochrome c-type biogenesis protein CcmH [Pectobacterium]
group_2500	BY21311_03774	DPMP315_02927	oxidative stress defense protein [Pectobacterium]
group_2501	BY21311_00449	DPMP315_04010	M48 family metallopeptidase [Pectobacterium]
group_2502	BY21311_00069	DPMP315_03152	hypothetical protein
group_2503	BY21311_01995	DPMP315_01611	helix-turn-helix transcriptional regulator [Pectobacterium]
group_2504	BY21311_00614	DPMP315_04431	glucuronate isomerase [Pectobacterium]
group_2505	BY21311_03172	DPMP315_02170	signal peptidase I [Pectobacterium]
group_2506	BY21311_03619	DPMP315_02773	TerD family protein [Pectobacterium]
group_2507	BY21311_03920	DPMP315_02414	50S ribosomal protein L23 [Pectobacteriaceae]
group_2508	BY21311_03908	DPMP315_02402	30S ribosomal protein S8 [Pectobacterium]
group_2509	BY21311_03072	DPMP315_03451	two-component system sensor histidine kinase BaeS [Pectobacterium]
group_251	BY21311_02521	DPMP315_02563	cysteine desulfuration protein SufE [Pectobacterium]
group_2510	BY21311_03588	DPMP315_02743	carbohydrate ABC transporter permease [Pectobacterium]
group_2511	BY21311_02390	DPMP315_01946	envelope stress response membrane protein PspB [Pectobacterium]
group_2512	BY21311_03906	DPMP315_02400	50S ribosomal protein L18 [Pectobacterium]
group_2513	BY21311_02247	DPMP315_01797	LLM class flavin-dependent oxidoreductase [Pectobacterium]
group_2514	BY21311_03762	DPMP315_02915	MDR efflux pump AcrAB transcriptional activator RobA [Pectobacterium]
group_2515	BY21311_00682	DPMP315_04368	hypothetical protein [Pectobacterium]
group_2516	BY21311_04295	DPMP315_00667	23S rRNA (adenine(2030)-N(6))-methyltransferase RlmJ [Pectobacterium]
group_2517	BY21311_02593	DPMP315_01253	antibiotic biosynthesis monooxygenase [Pectobacterium]
group_2518	BY21311_01472	DPMP315_04189	PRD domain-containing protein [Pectobacterium]
group_2519	BY21311_00169	DPMP315_01123	septal ring assembly protein ZapB [Pectobacterium]
group_252	BY21311_02534	DPMP315_01196	kinase/pyrophosphorylase [Pectobacterium]
group_2520	BY21311_03164	DPMP315_02162	sensor domain-containing diguanylate cyclase [Pectobacterium]
group_2521	BY21311_00355	DPMP315_03913	50S ribosomal protein L13 [Pectobacterium]
group_2522	BY21311_01742	DPMP315_03719	Bcr/CflA family multidrug efflux MFS transporter [Pectobacterium]
group_2523	BY21311_02445	DPMP315_02000	hypothetical protein
group_2524	BY21311_03986	DPMP315_01428	shikimate kinase AroK [Pectobacteriaceae]
group_2525	BY21311_03801	DPMP315_02953	glutathione synthase [Pectobacterium]
group_2526	BY21311_03027	DPMP315_03406	bifunctional methylenetetrahydrofolate dehydrogenase/methenyltetrahydrofolate cyclohydrolase FolD [Pectobacterium]
group_2527	BY21311_03508	DPMP315_00783	flavodoxin family protein [Pectobacterium]
group_2528	BY21311_00602	DPMP315_04443	pirin family protein [Pectobacterium]
group_2529	BY21311_03043	DPMP315_03422	hypothetical protein
group_253	BY21311_02559	DPMP315_01220	oxidoreductase [Pectobacterium]
group_2530	BY21311_01427	DPMP315_00440	MFS transporter [Pectobacterium]
group_2531	BY21311_00158	DPMP315_01134	envelope stress response regulator transcription factor CpxR [Pectobacterium]
group_2532	BY21311_01845	DPMP315_03623	integration host factor subunit beta [Pectobacterium]
group_2533	BY21311_03639	DPMP315_02792	ABC transporter permease [Pectobacterium]
group_2534	BY21311_02366	DPMP315_01922	YnbE family lipoprotein [Pectobacterium]
group_2535	BY21311_02081	DPMP315_01696	protein kinase YeaG [Pectobacterium]
group_2536	BY21311_00123	DPMP315_01166	permease-like cell division protein FtsX [Pectobacterium]
group_2537	BY21311_03976	DPMP315_01418	ABC transporter permease [Pectobacterium]
group_2538	BY21311_00643	DPMP315_04405	30S ribosomal protein S21 [Bacteria]
group_2539	BY21311_01434	DPMP315_00447	formate dehydrogenase-N subunit gamma [Pectobacterium]
group_254	BY21311_02560	DPMP315_01221	AraC family transcriptional regulator [Pectobacterium]
group_2540	BY21311_02316	DPMP315_01872	hypothetical protein
group_2541	BY21311_03034	DPMP315_03413	5-(carboxyamino)imidazole ribonucleotide synthase [Pectobacterium]
group_2542	BY21311_02135	DPMP315_01750	23S rRNA pseudouridine(2605) synthase RluB [Pectobacterium]
group_2543	BY21311_02705	DPMP315_02282	chemotaxis response regulator CheY [Pectobacterium]
group_2544	BY21311_04099	DPMP315_04074	class I adenylate cyclase [Pectobacterium]
group_2545	BY21311_02909	DPMP315_03312	acetyl-CoA carboxylase, carboxyltransferase subunit beta [Pectobacterium]
group_2546	BY21311_00039	DPMP315_01509	YceK/YidQ family lipoprotein [Pectobacterium]
group_2547	BY21311_01317	DPMP315_00330	Sec-independent protein translocase subunit TatA [Pectobacterium]
group_2548	BY21311_02882	DPMP315_03285	NADH-quinone oxidoreductase subunit C/D [Pectobacterium]
group_2549	BY21311_02269	DPMP315_01824	hypothetical protein [Pectobacterium]
group_255	BY21311_02563	DPMP315_01224	MFS transporter [Pectobacterium]
group_2551	BY21311_02636	DPMP315_01294	tellurite resistance TerB family protein [Pectobacterium]
group_2552	BY21311_00119	DPMP315_01170	hypothetical protein
group_2553	BY21311_03114	DPMP315_03493	flavodoxin-dependent (E)-4-hydroxy-3-methylbut-2-enyl-diphosphate synthase [Pectobacterium]
group_2554	BY21311_00672	DPMP315_04378	30S ribosomal protein S15 [Bacteria]
group_2555	BY21311_02015	DPMP315_01631	nitrous oxide-stimulated promoter family protein [Pectobacterium]
group_2556	BY21311_03155	DPMP315_03531	phosphatidylglycerophosphatase C [Pectobacterium]
group_2557	BY21311_01133	DPMP315_00147	hypothetical protein
group_2558	BY21311_03712	DPMP315_02865	thiamine ABC transporter substrate binding subunit [Pectobacterium]
group_2559	BY21311_01637	DPMP315_02470	hypothetical protein
group_256	BY21311_02589	DPMP315_01249	Maf-like protein [Pectobacterium]
group_2560	BY21311_00505	DPMP315_01031	L-rhamnose mutarotase [Pectobacterium]
group_2561	BY21311_01349	DPMP315_00362	asparagine synthase B [Pectobacterium]
group_2562	BY21311_00868	DPMP315_00504	LysR family transcriptional regulator [Pectobacterium]
group_2563	BY21311_04173	DPMP315_04149	uridine phosphorylase [Pectobacterium]
group_2564	BY21311_02338	DPMP315_01894	NarK family nitrate/nitrite MFS transporter [Pectobacterium]
group_2565	BY21311_01853	DPMP315_03615	ATP phosphoribosyltransferase [Pectobacterium]
group_2566	BY21311_02336	DPMP315_01892	nitrate reductase subunit beta [Pectobacterium]
group_2567	BY21311_03218	DPMP315_02216	RNA polymerase-binding protein DksA [Pectobacterium]
group_2568	BY21311_00985	DPMP315_00025	carboxymuconolactone decarboxylase family protein [Pectobacterium]
group_2569	BY21311_03669	DPMP315_02823	protein transport protein HofC [Pectobacterium]
group_257	BY21311_02627	DPMP315_01285	YccF domain-containing protein [Pectobacterium]
group_2570	BY21311_00866	DPMP315_00502	nitric oxide reductase transcriptional regulator NorR [Pectobacterium]
group_2571	BY21311_03784	DPMP315_02937	carbohydrate kinase [Pectobacterium]
group_2572	BY21311_01392	DPMP315_00405	Tol-Pal system protein TolQ [Pectobacterium]
group_2573	BY21311_02752	DPMP315_03177	hypothetical protein [Pectobacterium]
group_2574	BY21311_02509	DPMP315_02551	cytochrome c nitrite reductase pentaheme subunit [Pectobacterium]
group_2575	BY21311_03182	DPMP315_02180	uracil-DNA glycosylase [Pectobacterium]
group_2576	BY21311_01337	DPMP315_00350	CNNM family magnesium/cobalt transport protein CorC [Pectobacterium]
group_2577	BY21311_03433	DPMP315_00857	tRNA pseudouridine(13) synthase TruD [Pectobacterium]
group_2578	BY21311_00019	DPMP315_01529	ABC transporter substrate-binding protein [Pectobacterium]
group_2579	BY21311_03576	DPMP315_02735	aspartate/tyrosine/aromatic aminotransferase [Pectobacterium]
group_258	BY21311_02632	DPMP315_01290	hypothetical protein
group_2580	BY21311_04377	DPMP315_02999	phosphate ABC transporter ATP-binding protein PstB [Pectobacterium]
group_2581	BY21311_03014	DPMP315_03393	PTS lactose/cellobiose transporter subunit IIA [Pectobacterium]
group_2582	BY21311_02154	DPMP315_01769	L-arabinose ABC transporter ATP-binding protein AraG [Pectobacterium]
group_2583	BY21311_03835	DPMP315_02987	NAD(P)-dependent alcohol dehydrogenase [Pectobacterium]
group_2584	BY21311_02855	DPMP315_03258	hypothetical protein
group_2585	BY21311_00327	DPMP315_03885	p-hydroxybenzoic acid efflux pump operon protein AaeX [Pectobacterium]
group_2586	BY21311_02616	DPMP315_01274	NUDIX hydrolase [Pectobacterium]
group_2587	BY21311_02453	DPMP315_02008	riboflavin synthase subunit alpha [Pectobacterium]
group_2588	BY21311_00343	DPMP315_03901	calcium/sodium antiporter [Pectobacterium]
group_2589	BY21311_00265	DPMP315_03050	hypothetical protein
group_259	BY21311_02645	DPMP315_01303	hypothetical protein
group_2590	BY21311_03797	DPMP315_02949	methionine adenosyltransferase [Pectobacterium]
group_2591	BY21311_02171	DPMP315_00918	hypothetical protein
group_2592	BY21311_01870	DPMP315_02362	APC family permease [Pectobacterium]
group_2593	BY21311_00023	DPMP315_01525	ABC transporter permease [Pectobacterium]
group_2595	BY21311_03102	DPMP315_03481	putative addiction module antidote protein [Pectobacterium]
group_2596	BY21311_01617	DPMP315_02490	GntR family transcriptional regulator [Pectobacterium]
group_2597	BY21311_03356	DPMP315_03842	hypothetical protein [Pectobacterium]
group_2598	BY21311_00890	DPMP315_00524	amino acid ABC transporter ATP-binding protein [Pectobacterium]
group_2599	BY21311_01113	DPMP315_00124	Rho-binding antiterminator [Pectobacterium]
manR_1	BY21311_00392	DPMP315_03950 DPMP315_03949	Transcriptional regulator ManR
group_260	BY21311_02667	DPMP315_03829	hypothetical protein
group_2601	BY21311_01136	DPMP315_00150	alpha/beta fold hydrolase [Pectobacterium]
group_2602	BY21311_03950	DPMP315_02444	YheU family protein [Pectobacterium]
group_2603	BY21311_01858	DPMP315_02374	response regulator [Pectobacterium]
group_2604	BY21311_01038	DPMP315_00053	NADP(H)-dependent aldo-keto reductase [Pectobacterium]
group_2605	BY21311_01551	DPMP315_04268	heme acquisition protein HasA [Pectobacterium]
group_2606	BY21311_03817	DPMP315_02969	tRNA epoxyqueuosine(34) reductase QueG [Pectobacterium]
group_2607	BY21311_02137	DPMP315_01752	YciK family oxidoreductase [Pectobacterium]
group_2608	BY21311_01315	DPMP315_00328	transcription antiterminator/RNA stability regulator CspE [Pectobacterium]
group_2609	BY21311_02633	DPMP315_01291	macrodomain Ter protein MatP [Pectobacterium]
group_261	BY21311_02669	DPMP315_02318	flagellar filament capping protein FliD [Pectobacterium]
group_2610	BY21311_03942	DPMP315_02436	SlyX family protein [Pectobacterium]
group_2611	BY21311_03438	DPMP315_00852	amino acid ABC transporter permease [Pectobacterium]
group_2612	BY21311_04274	DPMP315_00688	glycine--tRNA ligase subunit alpha [Pectobacterium]
group_2613	BY21311_01869	DPMP315_02363	hypothetical protein [Pectobacterium]
group_2614	BY21311_01282	DPMP315_00295	4-hydroxy-tetrahydrodipicolinate synthase [Pectobacterium]
group_2615	BY21311_00224	DPMP315_03080	bifunctional demethylmenaquinone methyltransferase/2-methoxy-6-polyprenyl-1,4-benzoquinol methylase UbiE [Pectobacterium]
group_2616	BY21311_01786	DPMP315_03675	aspartate:alanine antiporter [Pectobacterium]
group_2617	BY21311_02510	DPMP315_02552	ammonia-forming nitrite reductase cytochrome c552 subunit [Pectobacterium]
group_2618	BY21311_03157	DPMP315_03533	transglutaminase-like cysteine peptidase [Pectobacterium]
group_2619	BY21311_03973	DPMP315_01415	nitrite reductase small subunit NirD [Pectobacterium]
group_262	BY21311_02670	DPMP315_02317	flagellar export chaperone FliS [Pectobacterium]
group_2620	BY21311_00646	DPMP315_04402	malate dehydrogenase [Pectobacterium]
group_2621	BY21311_01118	DPMP315_00133	glutathione S-transferase [Pectobacterium]
group_2622	BY21311_01574	DPMP315_04292	LysR family transcriptional regulator [Pectobacterium]
group_2623	BY21311_00028	DPMP315_01520	GNAT family N-acetyltransferase [Pectobacterium]
group_2624	BY21311_00026	DPMP315_01522	XRE family transcriptional regulator [Pectobacterium]
group_2625	BY21311_03542	DPMP315_02701	lysophospholipid transporter LplT [Pectobacterium]
group_2626	BY21311_03892	DPMP315_02386	methionyl-tRNA formyltransferase [Pectobacterium]
group_2627	BY21311_00128	DPMP315_01161	high-affinity branched-chain amino acid ABC transporter permease LivM [Pectobacterium]
group_2628	BY21311_00730	DPMP315_04320	peptide chain release factor 2 [Pectobacterium]
group_2629	BY21311_00691	DPMP315_04359	hypothetical protein
group_263	BY21311_02671	DPMP315_02316	flagella biosynthesis regulatory protein FliT [Pectobacterium]
group_2630	BY21311_01116	DPMP315_00127	envelope stress response activation lipoprotein NlpE [Pectobacterium]
group_2631	BY21311_00648	DPMP315_04400	putative DNA-binding transcriptional regulator [Pectobacterium]
group_2632	BY21311_01951	DPMP315_00968	glucose-6-phosphate dehydrogenase [Pectobacterium]
group_2633	BY21311_03418	DPMP315_03192	CDP-diacylglycerol--serine O-phosphatidyltransferase [Pectobacterium]
group_2634	BY21311_01335	DPMP315_00348	amino acid ABC transporter substrate-binding protein [Pectobacterium]
group_2635	BY21311_02613	DPMP315_01271	universal stress protein [Pectobacterium]
group_2636	BY21311_00346	DPMP315_03904	outer membrane lipid asymmetry maintenance protein MlaD [Pectobacterium]
group_2637	BY21311_02117	DPMP315_01732	cardiolipin synthase [Pectobacterium]
group_2638	BY21311_01788	DPMP315_03673	GrxA family glutaredoxin [Pectobacterium]
group_2639	BY21311_01214	DPMP315_00227	hemolysin expression modulator Hha [Pectobacterium]
group_264	BY21311_02687	DPMP315_02300	flagellar hook-associated protein FlgL [Pectobacterium]
group_2640	BY21311_02037	DPMP315_01653	manganese/iron ABC transporter ATP-binding protein [Pectobacterium]
group_2641	BY21311_01974	DPMP315_01590	GAF domain-containing protein [Pectobacterium]
group_2642	BY21311_02530	DPMP315_02572	AI-2E family transporter YdiK [Pectobacterium]
group_2643	BY21311_03436	DPMP315_00854	cell division protein FtsB [Pectobacterium]
group_2644	BY21311_04311	DPMP315_00651	Ail/Lom family outer membrane beta-barrel protein [Pectobacterium]
group_2645	BY21311_03795	DPMP315_02947	hypothetical protein
group_2646	BY21311_01138	DPMP315_00152	glycosyl hydrolase family 28 protein [Pectobacterium]
group_2647	BY21311_02149	DPMP315_01764	electron transport complex subunit RsxA [Pectobacterium]
group_2648	BY21311_00401	DPMP315_03959	2,5-didehydrogluconate reductase DkgA [Pectobacterium]
group_2649	BY21311_02092	DPMP315_01707	DNA topoisomerase III [Pectobacterium]
group_265	BY21311_02688	DPMP315_02299	flagellar hook-associated protein FlgK [Pectobacterium]
group_2650	BY21311_04076	DPMP315_04051	anaerobic glycerol-3-phosphate dehydrogenase subunit C [Pectobacterium]
group_2651	BY21311_00045	DPMP315_01503	two-component system response regulator DcuR [Pectobacterium]
group_2652	BY21311_02629	DPMP315_01287	TfoX/Sxy family DNA transformation protein [Pectobacterium]
group_2653	BY21311_04212	DPMP315_00745	nucleoid occlusion factor SlmA [Pectobacterium]
group_2654	BY21311_01984	DPMP315_01600	cupin domain-containing protein [Pectobacterium]
group_2655	BY21311_01190	DPMP315_00203	cytochrome o ubiquinol oxidase subunit I [Pectobacterium]
group_2656	BY21311_01665	DPMP315_03806	AraC family transcriptional regulator [Pectobacterium]
group_2657	BY21311_00170	DPMP315_01122	ribonuclease E activity regulator RraA [Pectobacterium]
group_2658	BY21311_03459	DPMP315_00831	hypothetical protein
group_2659	BY21311_03583	DPMP315_02738	excinuclease ABC subunit UvrA [Pectobacterium]
group_266	BY21311_02695	DPMP315_02292	flagellar hook assembly protein FlgD [Pectobacterium]
group_2660	BY21311_00415	DPMP315_03973	YiiG family protein [Pectobacterium]
group_2661	BY21311_03645	DPMP315_02798	PTS sugar transporter subunit IIB [Pectobacterium]
group_2662	BY21311_01059	DPMP315_00071	amino-acid N-acetyltransferase [Pectobacterium]
group_2663	BY21311_02891	DPMP315_03294	hypothetical protein
group_2664	BY21311_01839	DPMP315_03629	formate transporter FocA [Pectobacterium]
group_2665	BY21311_02541	DPMP315_01203	EAL domain-containing protein [Pectobacterium]
group_2666	BY21311_02598	DPMP315_01258	cytochrome b [Pectobacterium]
group_2667	BY21311_03048	DPMP315_03427	helix-turn-helix domain-containing protein [Pectobacterium]
group_2668	BY21311_01512	DPMP315_04230	ABC transporter substrate-binding protein [Pectobacterium]
group_2669	BY21311_01681	DPMP315_03790	ABC transporter substrate-binding protein [Pectobacterium]
group_267	BY21311_02720	DPMP315_03169	tyrosine-type recombinase/integrase [Pectobacterium]
group_2670	BY21311_01904	DPMP315_02328	intermembrane transport protein PqiB [Pectobacterium]
group_2671	BY21311_02167	DPMP315_00922	LysR family transcriptional regulator [Pectobacterium]
group_2672	BY21311_00829	DPMP315_02574	NADP-dependent oxaloacetate-decarboxylating malate dehydrogenase [Pectobacterium]
group_2673	BY21311_03626	DPMP315_02780	sodium:solute symporter family protein [Pectobacterium]
group_2674	BY21311_00657	DPMP315_04391	ribosome assembly RNA-binding protein YhbY [Pectobacterium]
group_2675	BY21311_02439	DPMP315_01995	pyridoxamine 5'-phosphate oxidase [Pectobacterium]
group_2676	BY21311_00741	DPMP315_02633	Na+/H+ antiporter [Pectobacterium]
group_2677	BY21311_00153	DPMP315_01139	hypothetical protein [Pectobacterium]
group_2678	BY21311_01778	DPMP315_03683	PQQ-dependent sugar dehydrogenase [Pectobacterium]
group_2679	BY21311_01166	DPMP315_00179	hypothetical protein
group_268	BY21311_02721	DPMP315_02264	antitoxin [Pectobacterium]
group_2680	BY21311_00249	DPMP315_03034	bifunctional biotin--[acetyl-CoA-carboxylase] ligase/biotin operon repressor BirA [Pectobacterium]
group_2681	BY21311_03326	DPMP315_01389	Hcp family type VI secretion system effector [Pectobacterium]
group_2682	BY21311_01776	DPMP315_03685	hypothetical protein [Pectobacterium]
group_2683	BY21311_02245	DPMP315_01795	M20 peptidase aminoacylase family protein [Pectobacterium]
group_2684	BY21311_00833	DPMP315_00467	YaiI/YqxD family protein [Pectobacterium]
group_2685	BY21311_01066	DPMP315_00078	TetR family transcriptional regulator [Pectobacterium]
group_2686	BY21311_03600	DPMP315_02754	metal ABC transporter permease [Pectobacterium]
group_2687	BY21311_03983	DPMP315_01425	adenine-specific DNA-methyltransferase [Pectobacterium]
group_2688	BY21311_02423	DPMP315_01979	ABC transporter permease [Pectobacterium]
group_2689	BY21311_03046	DPMP315_03425	YjfB family protein [Pectobacterium]
group_269	BY21311_02726	DPMP315_02259	hypothetical protein [Pectobacterium]
group_2690	BY21311_01584	DPMP315_04302	TonB-dependent siderophore receptor [Pectobacterium]
group_2691	BY21311_04204	DPMP315_03593	pantetheine-phosphate adenylyltransferase [Pectobacterium]
group_2692	BY21311_00357	DPMP315_03915	stringent starvation protein A [Pectobacterium]
group_2693	BY21311_02644	DPMP315_01302	phosphate starvation-inducible protein PhoH [Pectobacterium]
group_2694	BY21311_02596	DPMP315_01256	hypothetical protein [Pectobacterium]
group_2695	BY21311_03490	DPMP315_00799	SH3 domain-containing protein [Pectobacterium]
group_2696	BY21311_01227	DPMP315_00240	recombination mediator RecR [Pectobacterium]
group_2697	BY21311_01532	DPMP315_04249	DMT family transporter [Pectobacterium]
group_2698	BY21311_01090	DPMP315_00102	2,3,4,5-tetrahydropyridine-2,6-dicarboxylate N-succinyltransferase [Pectobacterium]
group_2699	BY21311_03903	DPMP315_02397	preprotein translocase subunit SecY [Pectobacterium]
group_27	BY21311_00443 BY21311_00444	DPMP315_04005	hypothetical protein
group_270	BY21311_02727	DPMP315_02258	hypothetical protein [Pectobacterium]
group_2700	BY21311_03680	DPMP315_02834	cell division protein FtsA [Pectobacterium]
group_2701	BY21311_02419	DPMP315_01975	sugar phosphate isomerase/epimerase [Pectobacterium]
group_2702	BY21311_01504	DPMP315_04222	oxidoreductase [Pectobacterium]
group_2703	BY21311_01519	DPMP315_04237	amino acid racemase [Pectobacterium]
group_2704	BY21311_03198	DPMP315_02197	sulfate ABC transporter substrate-binding protein [Pectobacterium]
group_2705	BY21311_03141	DPMP315_03519	3-phenylpropionate MFS transporter [Pectobacterium]
group_2706	BY21311_00822	DPMP315_02581	RpiB/LacA/LacB family sugar-phosphate isomerase [Pectobacterium]
group_2707	BY21311_01884	DPMP315_02348	envelope biogenesis factor ElyC [Pectobacterium]
group_2708	BY21311_04223	DPMP315_00734	isoaspartyl peptidase/L-asparaginase [Pectobacterium]
group_2709	BY21311_01686	DPMP315_03785	LysE family translocator [Pectobacterium]
group_271	BY21311_02732	DPMP315_02252	inovirus-type Gp2 protein [Pectobacterium]
group_2710	BY21311_01735	DPMP315_03725	nucleoid-associated protein YejK [Pectobacterium]
group_2711	BY21311_01161	DPMP315_00174	cobalamin-independent methionine synthase II family protein [Pectobacterium]
group_2712	BY21311_00476	DPMP315_01002	GNAT family N-acetyltransferase [Pectobacterium]
group_2713	BY21311_04065	DPMP315_04041	heparinase II/III family protein [Pectobacterium]
group_2714	BY21311_01388	DPMP315_00401	cytochrome d ubiquinol oxidase subunit II [Pectobacterium]
group_2715	BY21311_02295	DPMP315_01849	EscD/YscD/HrpQ family type III secretion system inner membrane ring protein [Pectobacterium]
group_2716	BY21311_00533	DPMP315_01061	Xaa-Pro aminopeptidase [Pectobacterium]
group_2717	BY21311_01496	DPMP315_04214	sensor domain-containing diguanylate cyclase [Pectobacterium]
group_2718	BY21311_00746	DPMP315_02638	Flp pilus assembly protein CpaB [Pectobacterium]
group_2719	BY21311_02484	DPMP315_02526	LysR family transcriptional regulator [Pectobacterium]
group_272	BY21311_02734	DPMP315_02249	hypothetical protein [Pectobacterium]
group_2720	BY21311_00725	DPMP315_04325	MHS family MFS transporter [Pectobacterium]
group_2721	BY21311_01897	DPMP315_02335	aminopeptidase N [Pectobacterium]
group_2722	BY21311_03452	DPMP315_00838	glycosyl hydrolase family 28 protein [Pectobacterium]
group_2723	BY21311_04366	DPMP315_03010	F0F1 ATP synthase subunit alpha [Pectobacterium]
group_2724	BY21311_02694	DPMP315_02293	flagellar hook protein FlgE [Pectobacterium]
group_2725	BY21311_03060	DPMP315_03440	sugar ABC transporter permease [Pectobacterium]
group_2726	BY21311_03440	DPMP315_00850	hypothetical protein
group_2727	BY21311_02546	DPMP315_01208	glutathione peroxidase [Pectobacterium]
group_2728	BY21311_01293	DPMP315_00306	FecR family protein [Pectobacterium]
group_2729	BY21311_02607	DPMP315_01266	PepSY domain-containing protein [Pectobacterium]
group_273	BY21311_02737	DPMP315_02246	HNH endonuclease [Pectobacterium]
group_2730	BY21311_03770	DPMP315_02923	zinc-binding alcohol dehydrogenase family protein [Pectobacterium]
group_2731	BY21311_02003	DPMP315_01619	protease HtpX [Pectobacterium]
group_2732	BY21311_03695	DPMP315_02849	L-alanine exporter AlaE [Pectobacterium]
group_2733	BY21311_04181	DPMP315_04157	serine O-acetyltransferase [Pectobacterium]
group_2734	BY21311_01152	DPMP315_00166	methyl-accepting chemotaxis protein [Pectobacterium]
group_2735	BY21311_01539	DPMP315_04256	ABC transporter ATP-binding protein [Pectobacterium]
group_2736	BY21311_01608	DPMP315_02498	DgsA anti-repressor MtfA [Pectobacterium]
group_2737	BY21311_01140	DPMP315_00154	type I secretion system permease/ATPase [Pectobacterium]
group_2738	BY21311_02925	DPMP315_03328	phosphohistidine phosphatase SixA [Pectobacterium]
group_2739	BY21311_00513	DPMP315_01039	ABC transporter ATP-binding protein [Pectobacterium]
group_274	BY21311_02763	DPMP315_04026	AlpA family transcriptional regulator [Pectobacterium]
group_2740	BY21311_04400	DPMP315_01564	GGDEF domain-containing protein [Pectobacterium]
group_2741	BY21311_04359	DPMP315_03017	tRNA uridine-5-carboxymethylaminomethyl(34) synthesis enzyme MnmG [Pectobacterium]
group_2742	BY21311_04101	DPMP315_04076	uroporphyrinogen-III synthase [Pectobacterium]
group_2743	BY21311_03207	DPMP315_02206	glutathione S-transferase [Pectobacterium]
group_2744	BY21311_00630	DPMP315_04416	carbohydrate porin [Pectobacterium]
group_2745	BY21311_00748	DPMP315_02640	CpaD family pilus assembly protein [Pectobacterium]
group_2746	BY21311_04165	DPMP315_04141	hypothetical protein
group_2747	BY21311_00478	DPMP315_01004	alpha/beta hydrolase [Pectobacterium]
group_2748	BY21311_01947	DPMP315_00964	murein DD-endopeptidase MepM [Pectobacterium]
group_2749	BY21311_00529	DPMP315_01057	APC family permease [Pectobacterium]
group_275	BY21311_02798	DPMP315_03213	translation elongation factor 4 [Pectobacterium]
group_2750	BY21311_03411	DPMP315_03199	multidrug efflux MFS transporter permease subunit EmrB [Pectobacterium]
group_2751	BY21311_01958	DPMP315_00974	non-heme ferritin [Pectobacterium]
group_2752	BY21311_04256	DPMP315_00705	XylR family transcriptional regulator [Pectobacterium]
group_2753	BY21311_01862	DPMP315_02370	[citrate (pro-3S)-lyase] ligase [Pectobacterium]
group_2754	BY21311_03726	DPMP315_02879	4-hydroxythreonine-4-phosphate dehydrogenase PdxA [Pectobacterium]
group_2755	BY21311_01289	DPMP315_00302	metallopeptidase TldD-related protein [Pectobacterium]
group_2756	BY21311_04336	DPMP315_00627	DNA polymerase I [Pectobacterium]
group_2757	BY21311_00488	DPMP315_01013	PLP-dependent cysteine synthase family protein [Pectobacterium]
group_2758	BY21311_03537	DPMP315_00755	radical SAM family heme chaperone HemW [Pectobacterium]
group_2759	BY21311_03842	DPMP315_02994	decarboxylase [Pectobacterium]
group_276	BY21311_02799	DPMP315_03212	SulP family inorganic anion transporter [Pectobacterium]
group_2760	BY21311_02377	DPMP315_01933	peptide ABC transporter substrate-binding protein [Pectobacterium]
group_2761	BY21311_01678	DPMP315_03793	DeoR/GlpR family DNA-binding transcription regulator [Pectobacterium]
group_2762	BY21311_00121	DPMP315_01168	signal recognition particle-docking protein FtsY [Pectobacterium]
group_2763	BY21311_00563	DPMP315_01091	efflux RND transporter periplasmic adaptor subunit [Pectobacterium]
group_2764	BY21311_03277	DPMP315_01342	nicotinamide-nucleotide amidase [Pectobacterium]
group_2765	BY21311_01075	DPMP315_00087	cysteine desulfurase CsdA [Pectobacterium]
group_2766	BY21311_02199	DPMP315_00889	SDR family NAD(P)-dependent oxidoreductase [Pectobacterium]
group_2767	BY21311_00408	DPMP315_03966	carotenoid oxygenase family protein [Pectobacterium]
group_2768	BY21311_04035	DPMP315_01476	ribokinase [Pectobacterium]
group_2769	BY21311_01969	DPMP315_01585	sel1 repeat family protein [Pectobacterium]
group_277	BY21311_02807	DPMP315_03111	alpha/beta fold hydrolase [Pectobacterium]
group_2770	BY21311_00420	DPMP315_03978	aminoimidazole riboside kinase [Pectobacterium]
group_2771	BY21311_01765	DPMP315_03696	oxidoreductase [Pectobacterium]
group_2772	BY21311_02042	DPMP315_01658	hypothetical protein
group_2773	BY21311_02322	DPMP315_01878	PLP-dependent aminotransferase family protein [Pectobacterium]
group_2774	BY21311_03110	DPMP315_03489	ribosome biogenesis GTPase Der [Pectobacterium]
group_2775	BY21311_03949	DPMP315_02443	hydrolase [Pectobacterium]
group_2776	BY21311_03992	DPMP315_01433	pilus assembly protein PilM [Pectobacterium]
group_2777	BY21311_01410	DPMP315_00423	efflux RND transporter permease subunit [Pectobacterium]
group_2778	BY21311_03937	DPMP315_02431	two-component system sensor histidine kinase PmrB [Pectobacterium]
group_2779	BY21311_04071	DPMP315_04047	glycoside hydrolase family 88 protein [Pectobacterium]
group_278	BY21311_02810	DPMP315_03114	efflux RND transporter periplasmic adaptor subunit [Pectobacterium]
group_2780	BY21311_01851	DPMP315_03617	histidinol-phosphate transaminase [Pectobacterium]
group_2781	BY21311_03780	DPMP315_02933	SMP-30/gluconolactonase/LRE family protein [Pectobacterium]
group_2782	BY21311_02142	DPMP315_01757	dipeptide/tripeptide permease DtpA [Pectobacterium]
group_2783	BY21311_00195	DPMP315_01097	YijD family membrane protein [Pectobacterium]
group_2784	BY21311_00894	DPMP315_00528	IclR family transcriptional regulator [Pectobacterium]
group_2785	BY21311_04015	DPMP315_01456	2-keto-3-deoxygluconate transporter [Pectobacterium]
group_2786	BY21311_01874	DPMP315_02358	iron chelate uptake ABC transporter family permease subunit [Pectobacterium]
group_2787	BY21311_00021	DPMP315_01527	nucleoside hydrolase [Pectobacterium]
group_2788	BY21311_00807	DPMP315_02596	Nramp family divalent metal transporter [Pectobacterium]
group_2789	BY21311_01676	DPMP315_03795	D-alanyl-D-alanine endopeptidase [Pectobacterium]
group_279	BY21311_02812	DPMP315_03116	response regulator [Pectobacterium]
group_2790	BY21311_01569	DPMP315_04287	Rpn family recombination-promoting nuclease/putative transposase [Pectobacterium]
group_2791	BY21311_00203	DPMP315_03101	ABC transporter substrate-binding protein [Pectobacterium]
group_2792	BY21311_04338	DPMP315_00625	serine/threonine protein kinase [Pectobacterium]
group_2793	BY21311_00486	DPMP315_01011	hypothetical protein [Pectobacterium]
group_2794	BY21311_03728	DPMP315_02881	Co2+/Mg2+ efflux protein ApaG [Pectobacterium]
group_2795	BY21311_04258	DPMP315_00703	xylose ABC transporter ATP-binding protein [Pectobacterium]
group_2796	BY21311_01022	DPMP315_00037	ornithine decarboxylase [Pectobacterium]
group_2797	BY21311_01699	DPMP315_03772	hypothetical protein [Pectobacterium]
group_2798	BY21311_04270	DPMP315_00691	PTS mannitol transporter subunit IICBA [Pectobacterium]
group_2799	BY21311_03089	DPMP315_03468	LysR family transcriptional regulator [Pectobacterium]
group_28	BY21311_00494	DPMP315_01022 DPMP315_01019	RNA repair transcriptional activator RtcR [Pectobacterium]
group_280	BY21311_02820	DPMP315_03124	hypothetical protein
group_2800	BY21311_00679	DPMP315_04371	SCP2 domain-containing protein [Pectobacterium]
group_2801	BY21311_03876	DPMP315_02693	phosphatidate cytidylyltransferase [Pectobacterium]
group_2802	BY21311_01230	DPMP315_00243	ferrochelatase [Pectobacterium]
group_2803	BY21311_00112	DPMP315_01177	MFS transporter [Pectobacterium]
group_2804	BY21311_01553	DPMP315_04270	FecR domain-containing protein [Pectobacterium]
group_2805	BY21311_03954	DPMP315_02448	aspartate aminotransferase family protein [Pectobacterium]
group_2806	BY21311_00755	DPMP315_02647	hypothetical protein [Pectobacterium]
group_2807	BY21311_03719	DPMP315_02872	sensor domain-containing diguanylate cyclase [Pectobacterium]
group_2808	BY21311_03009	DPMP315_03388	DltD [Pectobacterium]
group_2809	BY21311_00590	DPMP315_04453	aspartate ammonia-lyase [Pectobacterium]
odh	BY21311_02839	DPMP315_03242	Opine dehydrogenase
group_2810	BY21311_02514	DPMP315_02556	carbohydrate porin [Pectobacterium]
group_2811	BY21311_00032	DPMP315_01516	FMNH2-dependent alkanesulfonate monooxygenase [Pectobacterium]
group_2812	BY21311_04149	DPMP315_04126	ABC transporter permease [Pectobacterium]
group_2813	BY21311_03723	DPMP315_02876	co-chaperone DjlA [Pectobacterium]
group_2814	BY21311_04092	DPMP315_04067	5-amino-6-(5-phospho-D-ribitylamino)uracil phosphatase YigB [Pectobacterium]
group_2815	BY21311_02076	DPMP315_01691	6-phosphofructokinase [Pectobacterium]
group_2816	BY21311_03747	DPMP315_02900	Na+/H+ antiporter NhaA [Pectobacterium]
group_2817	BY21311_02262	DPMP315_01816	allophanate hydrolase [Pectobacterium]
group_2818	BY21311_02889	DPMP315_03292	sugar phosphatase [Pectobacterium]
group_2819	BY21311_00393	DPMP315_03951	TonB-dependent receptor [Pectobacterium]
group_282	BY21311_02841	DPMP315_03244	Rpn family recombination-promoting nuclease/putative transposase [Pectobacterium]
group_2820	BY21311_00220	DPMP315_03084	N-acetyl-gamma-glutamyl-phosphate reductase [Pectobacterium]
group_2821	BY21311_04333	DPMP315_00630	oxygen-independent coproporphyrinogen III oxidase [Pectobacterium]
group_2822	BY21311_00702	DPMP315_04348	acetolactate decarboxylase [Pectobacterium]
group_2823	BY21311_03554	DPMP315_02714	glycerate kinase [Pectobacterium]
group_2824	BY21311_00132	DPMP315_01157	methyl-accepting chemotaxis protein [Pectobacterium]
group_2825	BY21311_00483	DPMP315_01009	aspartate ammonia-lyase [Pectobacterium]
group_2826	BY21311_04192	DPMP315_04168	O-antigen ligase family protein [Pectobacterium]
group_2827	BY21311_01953	DPMP315_00969	bifunctional 4-hydroxy-2-oxoglutarate aldolase/2-dehydro-3-deoxy-phosphogluconate aldolase [Pectobacterium]
group_2828	BY21311_02078	DPMP315_01693	multidrug effflux MFS transporter [Pectobacterium]
group_2829	BY21311_03739	DPMP315_02892	4-hydroxy-tetrahydrodipicolinate reductase [Pectobacterium]
group_283	BY21311_02849	DPMP315_03252	tail fiber protein [Pectobacterium]
group_2830	BY21311_00197	DPMP315_01095	TonB-dependent vitamin B12 receptor BtuB [Pectobacterium]
group_2831	BY21311_00403	DPMP315_03961	NADPH-dependent oxidoreductase [Pectobacterium]
group_2832	BY21311_03662	DPMP315_02816	amino acid permease [Pectobacterium]
group_2833	BY21311_02251	DPMP315_01801	amino acid ABC transporter permease [Pectobacterium]
group_2834	BY21311_04017	DPMP315_01458	carbapenem biosynthesis protein CpmH [Pectobacterium]
group_2835	BY21311_01724	DPMP315_03748	MFS transporter [Pectobacterium]
group_2836	BY21311_02955	DPMP315_03358	A24 family peptidase [Pectobacterium]
group_2837	BY21311_00707	DPMP315_04343	aminomethyl-transferring glycine dehydrogenase [Pectobacterium]
group_2838	BY21311_00805	DPMP315_02598	NAD(+) kinase [Pectobacterium]
group_2839	BY21311_00184	DPMP315_01108	bifunctional aspartate kinase/homoserine dehydrogenase II [Pectobacterium]
cydX_2	BY21311_02853	DPMP315_03256	Cytochrome bd-I ubiquinol oxidase subunit X
group_2840	BY21311_03878	DPMP315_02695	isocitrate lyase [Pectobacterium]
group_2841	BY21311_01642	DPMP315_02465	GTP 3',8-cyclase MoaA [Pectobacterium]
group_2843	BY21311_02675	DPMP315_02312	flagellar assembly protein FliH [Pectobacterium]
group_2844	BY21311_00276	DPMP315_03061	uroporphyrinogen decarboxylase [Pectobacterium]
group_2845	BY21311_03384	DPMP315_02143	amino acid ABC transporter ATP-binding protein [Pectobacterium]
group_2846	BY21311_02543	DPMP315_01205	lipoate--protein ligase A [Pectobacterium]
group_2847	BY21311_02232	DPMP315_01784	zinc metallochaperone GTPase ZigA [Pectobacterium]
group_2848	BY21311_02008	DPMP315_01624	threonine--tRNA ligase [Pectobacterium]
group_2849	BY21311_01296	DPMP315_00309	ABC transporter ATP-binding protein/permease [Pectobacterium]
group_285	BY21311_02861	DPMP315_03264	heme utilization cystosolic carrier protein HutX [Pectobacterium]
group_2850	BY21311_01792	DPMP315_03668	spermidine/putrescine ABC transporter substrate-binding protein PotF [Pectobacterium]
group_2851	BY21311_02495	DPMP315_02537	c-type cytochrome biogenesis protein CcmI [Pectobacterium]
group_2852	BY21311_02020	DPMP315_01636	L-cystine transporter [Pectobacterium]
group_2853	BY21311_03612	DPMP315_02766	phosphoribosyltransferase domain-containing protein [Pectobacterium]
group_2854	BY21311_01107	DPMP315_00118	lipid-A-disaccharide synthase [Pectobacterium]
group_2855	BY21311_00174	DPMP315_01118	cell division protein FtsN [Pectobacterium]
group_2856	BY21311_03179	DPMP315_02177	tRNA1(Val) (adenine(37)-N6)-methyltransferase [Pectobacterium]
group_2857	BY21311_00450	DPMP315_04011	alpha/beta fold hydrolase [Pectobacterium]
group_2858	BY21311_04067	DPMP315_04043	Cof-type HAD-IIB family hydrolase [Pectobacterium]
group_2859	BY21311_02964	DPMP315_03367	type II secretion system inner membrane protein GspF [Pectobacterium]
group_286	BY21311_02926	DPMP315_03329	hypothetical protein
group_2860	BY21311_02685	DPMP315_02302	flagellar type III secretion system protein FliR [Pectobacterium]
[truncated: 2,635 more rows]

## Sheet: coregenome
Ortholog Group	BY21311	DPMP315T	Annotation
rhsC	BY21311_03319 BY21311_03311 BY21311_03304 BY21311_03316 BY21311_03313 BY21311_03307 BY21311_03308 BY21311_03315	DPMP315_01380 DPMP315_01382 DPMP315_01364 DPMP315_01371 DPMP315_01378 DPMP315_01374 DPMP315_01376	hypothetical protein
group_10	BY21311_00473 BY21311_02722 BY21311_02997	DPMP315_00998 DPMP315_02263	hypothetical protein
group_100	BY21311_00425	DPMP315_03982	type I-E CRISPR-associated protein Cse2/CasB [Pectobacterium]
group_101	BY21311_00465	DPMP315_04036	hypothetical protein
group_103	BY21311_00489	DPMP315_01014	M67 family metallopeptidase [Pectobacterium]
group_104	BY21311_00495	DPMP315_01023	RtcB family protein [Pectobacterium]
group_105	BY21311_00511	DPMP315_01037	Txe/YoeB family addiction module toxin [Pectobacterium]
group_1059	BY21311_03927	DPMP315_02421	elongation factor Tu [Pectobacterium]
group_106	BY21311_00521	DPMP315_01047	hypothetical protein
group_1060	BY21311_00111	DPMP315_01178	inner membrane protein YhjD [Pectobacterium]
group_1061	BY21311_03361	DPMP315_02120	glutamate 5-kinase [Pectobacterium]
group_1062	BY21311_03086	DPMP315_03465	alcohol dehydrogenase AdhP [Pectobacterium]
group_1063	BY21311_03943	DPMP315_02437	peptidylprolyl isomerase [Pectobacterium]
group_1064	BY21311_00874	DPMP315_00510	D-galactonate dehydratase family protein [Pectobacterium]
group_1065	BY21311_02697	DPMP315_02290	flagellar basal body rod protein FlgB [Pectobacterium]
group_1066	BY21311_02193	DPMP315_00895	OsmC family protein [Pectobacterium]
group_1067	BY21311_03716	DPMP315_02869	acetolactate synthase large subunit [Pectobacterium]
group_1068	BY21311_03385	DPMP315_02144	amino acid ABC transporter permease [Pectobacterium]
group_1069	BY21311_03006	DPMP315_03385	AMP-binding protein [Pectobacterium]
group_107	BY21311_00534	DPMP315_01062	YecA family protein [Pectobacterium]
group_1070	BY21311_04328	DPMP315_00635	ribosome-dependent GTPase TypA [Pectobacterium]
group_1071	BY21311_01887	DPMP315_02345	chromosome partition protein MukE [Pectobacterium]
group_1072	BY21311_02312	DPMP315_01868	methyl-accepting chemotaxis protein [Pectobacterium]
group_1073	BY21311_02494	DPMP315_02536	cytochrome c-type protein NapC [Pectobacterium]
group_1074	BY21311_00175	DPMP315_01117	DNA-binding transcriptional regulator CytR [Pectobacterium]
group_1075	BY21311_04146	DPMP315_04123	hypothetical protein
group_1076	BY21311_02079	DPMP315_01694	hemerythrin domain-containing protein [Pectobacterium]
group_1077	BY21311_01283	DPMP315_00296	outer membrane protein assembly factor BamC [Pectobacterium]
group_1078	BY21311_00410	DPMP315_03968	TRAP transporter large permease [Pectobacterium]
group_1079	BY21311_04091	DPMP315_04066	DNA helicase II [Pectobacterium]
group_108	BY21311_00536	DPMP315_01064	5-formyltetrahydrofolate cyclo-ligase [Pectobacterium]
group_1080	BY21311_01195	DPMP315_00208	trigger factor [Pectobacterium]
group_1081	BY21311_02886	DPMP315_03289	pyridoxal phosphate-dependent aminotransferase [Pectobacterium]
group_1082	BY21311_02684	DPMP315_02303	flagellar biosynthesis protein FliQ [Pectobacterium]
group_1083	BY21311_00031	DPMP315_01517	aliphatic sulfonate ABC transporter permease SsuC [Pectobacterium]
group_1084	BY21311_03204	DPMP315_02203	hypothetical protein [Pectobacterium]
group_1085	BY21311_01563	DPMP315_04281	AMP nucleosidase [Pectobacterium]
group_1086	BY21311_04046	DPMP315_01488	glucose-1-phosphate adenylyltransferase [Pectobacterium]
group_1087	BY21311_02581	DPMP315_01241	beta-ketoacyl-ACP synthase II [Pectobacterium]
group_1088	BY21311_01095	DPMP315_00107	UMP kinase [Pectobacterium]
group_1089	BY21311_01420	DPMP315_00433	molybdate ABC transporter substrate-binding protein [Pectobacterium]
group_109	BY21311_00549	DPMP315_01077	TonB-dependent receptor [Pectobacterium]
group_1090	BY21311_00131	DPMP315_01158	PLP-dependent aminotransferase family protein [Pectobacterium]
group_1091	BY21311_02384	DPMP315_01940	PTS sugar transporter subunit IIC [Pectobacterium]
group_1092	BY21311_03232	DPMP315_02230	YacC family pilotin-like protein [Pectobacterium]
group_1093	BY21311_03543	DPMP315_02702	bifunctional acyl-ACP--phospholipid O-acyltransferase/long-chain-fatty-acid--ACP ligase [Pectobacterium]
group_1094	BY21311_03527	DPMP315_00765	ribonuclease R [Pectobacterium]
group_1095	BY21311_03008	DPMP315_03387	hypothetical protein
group_1096	BY21311_03495	DPMP315_00794	methyl-accepting chemotaxis protein [Pectobacterium]
group_1097	BY21311_01944	DPMP315_00961	zinc ABC transporter permease subunit ZnuB [Pectobacterium]
group_1098	BY21311_02332	DPMP315_01888	MarR family transcriptional regulator [Pectobacterium]
group_1099	BY21311_02565	DPMP315_01226	NAD(P)/FAD-dependent oxidoreductase [Pectobacterium]
group_11	BY21311_00798 BY21311_01731	DPMP315_02605 DPMP315_03729 DPMP315_03741	integrase domain-containing protein [Pectobacterium]
group_110	BY21311_00554	DPMP315_01082	non-ribosomal peptide synthetase [Pectobacterium]
group_1100	BY21311_00862	DPMP315_00498	3,4-dihydroxy-2-butanone-4-phosphate synthase [Pectobacterium]
group_1101	BY21311_03284	DPMP315_01349	glutaredoxin 2 [Pectobacterium]
group_1102	BY21311_02501	DPMP315_02543	heme ABC transporter permease [Pectobacterium]
group_1103	BY21311_00376	DPMP315_03933	sel1 repeat family protein [Pectobacterium]
group_1104	BY21311_03605	DPMP315_02759	VWA domain-containing protein [Pectobacterium]
group_1105	BY21311_02093	DPMP315_01708	YnjH family protein [Pectobacterium]
group_1106	BY21311_03661	DPMP315_02815	pyruvate dehydrogenase complex transcriptional repressor PdhR [Pectobacterium]
group_1107	BY21311_01396	DPMP315_00409	peptidoglycan-associated lipoprotein Pal [Pectobacterium]
group_1108	BY21311_02756	DPMP315_03181	LysR family transcriptional regulator [Pectobacterium]
group_1109	BY21311_02304	DPMP315_01858	LysR family transcriptional regulator [Pectobacterium]
group_111	BY21311_00557	DPMP315_01085	amino acid adenylation domain-containing protein [Pectobacterium]
group_1110	BY21311_00430	DPMP315_03987	type I-E CRISPR-associated endoribonuclease Cas2e [Pectobacterium]
group_1111	BY21311_01641	DPMP315_02466	uridine diphosphate-N-acetylglucosamine-binding protein YvcK [Pectobacterium]
group_1112	BY21311_01698	DPMP315_03773	hypothetical protein [Pectobacterium]
group_1113	BY21311_04025	DPMP315_01466	LysE family translocator [Pectobacterium]
group_1114	BY21311_02397	DPMP315_01953	putrescine ABC transporter permease SapB [Pectobacterium]
group_1115	BY21311_01748	DPMP315_03713	bifunctional murein DD-endopeptidase/murein LD-carboxypeptidase [Pectobacterium]
group_1116	BY21311_01791	DPMP315_03669	YbjN domain-containing protein [Pectobacterium]
group_1117	BY21311_00279	DPMP315_03064	DNA-binding protein HU-alpha [Pectobacteriaceae]
group_1118	BY21311_00441	DPMP315_04003	aspartate carbamoyltransferase [Pectobacterium]
group_1119	BY21311_02109	DPMP315_01724	bifunctional acetaldehyde-CoA/alcohol dehydrogenase [Pectobacterium]
group_112	BY21311_00559	DPMP315_01087	putative Ig domain-containing protein [Pectobacterium]
group_1120	BY21311_02935	DPMP315_03338	hypothetical protein
group_1121	BY21311_01299	DPMP315_00312	hypothetical protein
group_1122	BY21311_00771	DPMP315_02627	AI-2E family transporter [Pectobacterium]
group_1123	BY21311_00812	DPMP315_02591	4-oxalocrotonate tautomerase family protein [Pectobacterium]
group_1124	BY21311_04213	DPMP315_00744	orotate phosphoribosyltransferase [Pectobacterium]
group_1125	BY21311_03611	DPMP315_02765	hypothetical protein [Pectobacterium]
group_1126	BY21311_03582	DPMP315_02737	secondary thiamine-phosphate synthase enzyme YjbQ [Pectobacterium]
group_1127	BY21311_02571	DPMP315_01232	purine nucleoside phosphoramidase [Pectobacterium]
group_1128	BY21311_01933	DPMP315_00950	hypothetical protein
group_1129	BY21311_03534	DPMP315_00758	YggT family protein [Pectobacterium]
group_113	BY21311_00560	DPMP315_01088	tail fiber protein [Pectobacterium]
group_1130	BY21311_00608	DPMP315_04437	YqjD family protein [Pectobacterium]
group_1131	BY21311_03251	DPMP315_01316	outer membrane protein assembly factor BamD [Pectobacterium]
group_1132	BY21311_03914	DPMP315_02408	50S ribosomal protein L29 [Pectobacterium]
group_1133	BY21311_00754	DPMP315_02646	hypothetical protein [Pectobacterium]
group_1134	BY21311_03759	DPMP315_02912	tRNA/rRNA methyltransferase [Pectobacterium]
group_1135	BY21311_03375	DPMP315_02134	S-methyl-5-thioribose kinase [Pectobacterium]
group_1136	BY21311_02211	DPMP315_00878	hypothetical protein
group_1137	BY21311_02422	DPMP315_01978	transketolase [Pectobacterium]
group_1138	BY21311_00040	DPMP315_01508	heat shock chaperone IbpA [Pectobacterium]
group_1139	BY21311_03982	DPMP315_01424	ribulose-phosphate 3-epimerase [Pectobacterium]
group_1140	BY21311_03809	DPMP315_02961	FtsH protease activity modulator HflK [Pectobacterium]
group_1141	BY21311_00523	DPMP315_01051	hypothetical protein [Pectobacterium]
group_1142	BY21311_01273	DPMP315_00286	phosphoribosylglycinamide formyltransferase [Pectobacterium]
group_1143	BY21311_02876	DPMP315_03279	NADH-quinone oxidoreductase subunit J [Pectobacterium]
group_1144	BY21311_02535	DPMP315_01197	3-deoxy-7-phosphoheptulonate synthase [Pectobacterium]
group_1145	BY21311_00320	DPMP315_03878	rod shape-determining protein MreC [Pectobacterium]
group_1146	BY21311_02674	DPMP315_02313	flagellar motor switch protein FliG [Pectobacterium]
rpmJ	BY21311_03902	DPMP315_02396	50S ribosomal protein L36
group_1148	BY21311_03514	DPMP315_00777	hypothetical protein
group_1149	BY21311_00519	DPMP315_01045	hypothetical protein
group_115	BY21311_00574	DPMP315_00555	type II toxin-antitoxin system antitoxin CcdA [Pectobacterium]
group_1150	BY21311_01250	DPMP315_00262	bifunctional 2-polyprenyl-6-hydroxyphenol methylase/3-demethylubiquinol 3-O-methyltransferase UbiG [Pectobacterium]
group_1151	BY21311_03889	DPMP315_02383	hypothetical protein
group_1152	BY21311_01913	DPMP315_00932	phosphatase [Pectobacterium]
group_1153	BY21311_03262	DPMP315_01327	30S ribosomal protein S16 [Pectobacterium]
group_1154	BY21311_02009	DPMP315_01625	translation initiation factor IF-3 [Pectobacterium]
group_1155	BY21311_01476	DPMP315_04193	MurR/RpiR family transcriptional regulator [Pectobacterium]
group_1156	BY21311_03934	DPMP315_02428	transcriptional regulator [Pectobacterium]
group_1157	BY21311_01746	DPMP315_03715	microcin C ABC transporter permease YejB [Pectobacterium]
rpmH	BY21311_04413	DPMP315_01551	50S ribosomal protein L34
group_1159	BY21311_01074	DPMP315_00086	cysteine desulfurase sulfur acceptor subunit CsdE [Pectobacterium]
group_116	BY21311_00583	DPMP315_04460	hypothetical protein
group_1160	BY21311_00821	DPMP315_02582	transaldolase [Pectobacterium]
group_1161	BY21311_02937	DPMP315_03340	malate dehydrogenase (quinone) [Pectobacterium]
group_1162	BY21311_03622	DPMP315_02776	D-threonate 4-phosphate dehydrogenase [Pectobacterium]
group_1163	BY21311_01689	DPMP315_03782	hypothetical protein
group_1164	BY21311_01764	DPMP315_03697	sugar ABC transporter ATP-binding protein [Pectobacterium]
group_1165	BY21311_03142	DPMP315_03520	serine hydroxymethyltransferase [Pectobacterium]
group_1166	BY21311_00094	DPMP315_03130	contact-dependent growth inhibition system immunity protein [Pectobacterium]
group_1167	BY21311_00303	DPMP315_03861	YhdT family protein [Pectobacterium]
group_1168	BY21311_03474	DPMP315_00815	hypothetical protein
group_1169	BY21311_02517	DPMP315_02559	transcriptional antiterminator BglG [Pectobacterium]
group_117	BY21311_00587	DPMP315_04456	protein-disulfide reductase DsbD [Pectobacterium]
group_1170	BY21311_00298	DPMP315_03856	DNA-binding transcriptional regulator Fis [Pectobacteriaceae]
group_1172	BY21311_01936	DPMP315_00953	YebC/PmpR family DNA-binding transcriptional regulator [Pectobacterium]
group_1173	BY21311_02010	DPMP315_01626	50S ribosomal protein L35 [Enterobacterales]
group_1174	BY21311_03150	DPMP315_03527	HAMP domain-containing histidine kinase [Pectobacterium]
group_1175	BY21311_01162	DPMP315_00175	branched-chain amino acid transport system II carrier protein [Pectobacterium]
group_1176	BY21311_04358	DPMP315_03018	FMN-binding protein MioC [Pectobacterium]
group_1177	BY21311_00749	DPMP315_02641	hypothetical protein [Pectobacterium]
group_1178	BY21311_01499	DPMP315_04217	hypothetical protein
group_1179	BY21311_01918	DPMP315_00937	ribosomal protein S5-alanine N-acetyltransferase [Pectobacterium]
group_118	BY21311_00588	DPMP315_04455	divalent cation tolerance protein CutA [Pectobacterium]
group_1180	BY21311_03173	DPMP315_02171	translation elongation factor 4 [Pectobacterium]
group_1181	BY21311_03810	DPMP315_02962	GTPase HflX [Pectobacterium]
group_1182	BY21311_01609	DPMP315_02497	lysozyme inhibitor LprI family protein [Pectobacterium]
group_1183	BY21311_02700	DPMP315_02287	flagellar export chaperone FlgN [Pectobacterium]
trpGD	BY21311_02130	DPMP315_01745	Bifunctional protein TrpGD
group_1185	BY21311_02728	DPMP315_02257	hypothetical protein
group_1186	BY21311_04369	DPMP315_03007	F0F1 ATP synthase subunit epsilon [Pectobacterium]
group_1187	BY21311_01831	DPMP315_03637	serine--tRNA ligase [Pectobacterium]
group_1188	BY21311_02549	DPMP315_01211	cupin domain-containing protein [Pectobacterium]
group_1189	BY21311_04114	DPMP315_04089	amino acid ABC transporter permease [Pectobacterium]
group_119	BY21311_00599	DPMP315_04446	diacylglycerol kinase [Pectobacterium]
group_1190	BY21311_04082	DPMP315_04057	homoserine/homoserine lactone efflux protein [Pectobacterium]
group_1191	BY21311_00545	DPMP315_01073	stress response protein [Pectobacterium]
group_1192	BY21311_02842	DPMP315_03245	uroporphyrinogen-III C-methyltransferase [Pectobacterium]
group_1193	BY21311_01309	DPMP315_00322	YpfN family protein [Pectobacterium]
group_1194	BY21311_04055	DPMP315_03218	hypothetical protein [Pectobacterium]
group_1195	BY21311_01743	DPMP315_03718	YejG family protein [Pectobacterium]
group_1196	BY21311_01875	DPMP315_02357	ABC transporter ATP-binding protein [Pectobacterium]
group_1197	BY21311_01536	DPMP315_04253	glutamate/aspartate:proton symporter GltP [Pectobacterium]
group_1198	BY21311_00260	DPMP315_03045	50S ribosomal protein L10 [Pectobacterium]
group_1199	BY21311_03073	DPMP315_03452	two-component system response regulator BaeR [Pectobacterium]
group_12	BY21311_00948 BY21311_00949	DPMP315_00585 DPMP315_00586 DPMP315_00584	phage tail protein [Pectobacterium]
group_120	BY21311_00610	DPMP315_04435	EnvZ/OmpR regulon moderator MzrA [Pectobacterium]
group_1200	BY21311_02030	DPMP315_01646	5-dehydro-4-deoxy-D-glucuronate isomerase [Pectobacterium]
group_1201	BY21311_04218	DPMP315_00739	glutathione ABC transporter substrate-binding protein [Pectobacterium]
group_1202	BY21311_03763	DPMP315_02916	2,3-diphosphoglycerate-dependent phosphoglycerate mutase GpmB [Pectobacterium]
cydX_1	BY21311_01389	DPMP315_00402	Cytochrome bd-I ubiquinol oxidase subunit X
group_1204	BY21311_01772	DPMP315_03689	GTP cyclohydrolase I FolE [Pectobacterium]
group_1205	BY21311_03050	DPMP315_03429	organic hydroperoxide resistance protein [Pectobacterium]
group_1206	BY21311_01276	DPMP315_00289	uracil permease [Pectobacterium]
group_1207	BY21311_02949	DPMP315_03352	ATP-dependent RNA helicase DbpA [Pectobacterium]
group_1208	BY21311_00107	DPMP315_01181	dicarboxylate/amino acid:cation symporter [Pectobacterium]
group_1209	BY21311_01174	DPMP315_00187	transcriptional regulator NrdR [Pectobacterium]
group_121	BY21311_00713	DPMP315_04337	ABC transporter ATP-binding protein [Pectobacterium]
group_1210	BY21311_01518	DPMP315_04236	hypothetical protein
group_1211	BY21311_04134	DPMP315_04109	UDP-N-acetylglucosamine--undecaprenyl-phosphate N-acetylglucosaminephosphotransferase [Pectobacterium]
group_1212	BY21311_00603	DPMP315_04442	LysR family transcriptional regulator [Pectobacterium]
group_1213	BY21311_01379	DPMP315_00392	succinate dehydrogenase cytochrome b556 subunit [Pectobacterium]
group_1214	BY21311_03925	DPMP315_02419	bacterioferritin [Pectobacterium]
group_1215	BY21311_01782	DPMP315_03679	ABC transporter permease [Pectobacterium]
group_1216	BY21311_04143	DPMP315_04120	ketol-acid reductoisomerase [Pectobacterium]
group_1217	BY21311_03729	DPMP315_02882	bis(5'-nucleosyl)-tetraphosphatase (symmetrical) ApaH [Pectobacterium]
group_1218	BY21311_01403	DPMP315_00416	nicotinamide riboside transporter PnuC [Pectobacterium]
group_1219	BY21311_02883	DPMP315_03286	NADH-quinone oxidoreductase subunit B [Pectobacterium]
group_122	BY21311_00717	DPMP315_04333	LacI family DNA-binding transcriptional regulator [Pectobacterium]
group_1220	BY21311_00399	DPMP315_03957	cell division protein FtsP [Pectobacterium]
group_1221	BY21311_01861	DPMP315_02371	fumarylacetoacetate hydrolase family protein [Pectobacterium]
group_1222	BY21311_03412	DPMP315_03198	NupC/NupG family nucleoside CNT transporter [Pectobacterium]
group_1223	BY21311_03221	DPMP315_02219	2-amino-4-hydroxy-6-hydroxymethyldihydropteridine diphosphokinase [Pectobacterium]
group_1224	BY21311_04339	DPMP315_00624	YihD family protein [Pectobacterium]
group_1225	BY21311_03003	DPMP315_03382	hypothetical protein
group_1226	BY21311_00642	DPMP315_04406	DNA primase [Pectobacterium]
group_1227	BY21311_02287	DPMP315_01841	membrane protein [Pectobacterium]
group_1228	BY21311_00122	DPMP315_01167	cell division ATP-binding protein FtsE [Pectobacterium]
group_1229	BY21311_03898	DPMP315_02392	DNA-directed RNA polymerase subunit alpha [Pectobacterium]
group_123	BY21311_00791	DPMP315_02607	Fic family protein [Pectobacterium]
group_1230	BY21311_01559	DPMP315_04276	methyl-accepting chemotaxis protein [Pectobacterium]
group_1231	BY21311_03387	DPMP315_02146	transporter substrate-binding domain-containing protein [Pectobacterium]
group_1232	BY21311_01206	DPMP315_00219	Lrp/AsnC family transcriptional regulator [Pectobacterium]
group_1233	BY21311_00210	DPMP315_03094	hypothetical protein [Pectobacterium]
group_1234	BY21311_01966	DPMP315_01582	hypothetical protein
group_1235	BY21311_04172	DPMP315_04148	tyrosine-protein phosphatase [Pectobacterium]
group_1236	BY21311_01885	DPMP315_02347	tRNA uridine 5-oxyacetic acid(34) methyltransferase CmoM [Pectobacterium]
group_1237	BY21311_02803	DPMP315_03208	ABC transporter permease [Pectobacterium]
group_1238	BY21311_00177	DPMP315_01115	50S ribosomal protein L31 [Pectobacterium]
group_1239	BY21311_02207	DPMP315_00882	fumarate/nitrate reduction transcriptional regulator Fnr [Pectobacterium]
group_124	BY21311_00793	DPMP315_02606	type II toxin-antitoxin system Phd/YefM family antitoxin [Pectobacterium]
group_1240	BY21311_01734	DPMP315_03726	YejL family protein [Pectobacterium]
group_1241	BY21311_01104	DPMP315_00115	UDP-3-O-(3-hydroxymyristoyl)glucosamine N-acyltransferase [Pectobacterium]
group_1242	BY21311_00673	DPMP315_04377	polyribonucleotide nucleotidyltransferase [Pectobacterium]
group_1243	BY21311_03946	DPMP315_02440	glutathione-regulated potassium-efflux system ancillary protein KefG [Pectobacterium]
group_1244	BY21311_00077	DPMP315_03145	zinc-binding alcohol dehydrogenase family protein [Pectobacterium]
group_1245	BY21311_03432	DPMP315_00858	protein-L-isoaspartate(D-aspartate) O-methyltransferase [Pectobacterium]
group_1246	BY21311_03948	DPMP315_02442	LysE family translocator [Pectobacterium]
group_1247	BY21311_03687	DPMP315_02841	phospho-N-acetylmuramoyl-pentapeptide-transferase [Pectobacterium]
group_1248	BY21311_02141	DPMP315_01756	HTH-type transcriptional regulator CysB [Pectobacterium]
group_1249	BY21311_01032	DPMP315_00047	oxidative damage protection protein [Pectobacterium]
group_125	BY21311_00837	DPMP315_00474	TonB-dependent receptor plug domain-containing protein [Pectobacterium]
group_1250	BY21311_00373	DPMP315_03930	plasmid stabilization protein [Pectobacterium]
group_1251	BY21311_04266	DPMP315_00695	methyl-accepting chemotaxis protein [Pectobacterium]
group_1252	BY21311_02096	DPMP315_01711	Hcp family type VI secretion system effector [Pectobacterium]
group_1253	BY21311_03860	DPMP315_02675	DMT family protein [Pectobacterium]
group_1254	BY21311_01220	DPMP315_00233	multidrug efflux transporter transcriptional repressor AcrR [Pectobacterium]
group_1255	BY21311_03497	DPMP315_00792	gamma-glutamylcyclotransferase [Pectobacterium]
group_1256	BY21311_01393	DPMP315_00406	colicin uptake protein TolR [Pectobacterium]
group_1257	BY21311_03733	DPMP315_02886	threonine/serine exporter ThrE family protein [Pectobacterium]
group_1258	BY21311_03546	DPMP315_02706	FCD domain-containing protein [Pectobacterium]
group_1259	BY21311_02440	DPMP315_01996	MliC family protein [Pectobacterium]
group_126	BY21311_00860	DPMP315_00496	ubiquinone biosynthesis accessory factor UbiK [Pectobacterium]
group_1260	BY21311_03896	DPMP315_02390	alternative ribosome-rescue factor A [Pectobacterium]
group_1261	BY21311_02060	DPMP315_01676	YcgL domain-containing protein [Pectobacterium]
group_1262	BY21311_00350	DPMP315_03908	UDP-N-acetylglucosamine 1-carboxyvinyltransferase [Pectobacterium]
group_1263	BY21311_03607	DPMP315_02761	VWA domain-containing protein [Pectobacterium]
group_1264	BY21311_04290	DPMP315_00672	thiol:disulfide interchange protein DsbG [Pectobacterium]
group_1265	BY21311_00230	DPMP315_03075	Sec-independent protein translocase subunit TatC [Pectobacterium]
group_1266	BY21311_04043	DPMP315_01485	NAD(P)H-dependent oxidoreductase [Pectobacterium]
group_1267	BY21311_02924	DPMP315_03327	endonuclease SmrB [Pectobacterium]
group_1268	BY21311_01959	DPMP315_00975	YebY family protein [Pectobacterium]
group_1269	BY21311_01755	DPMP315_03706	1-phosphofructokinase [Pectobacterium]
group_127	BY21311_00861	DPMP315_00497	hypothetical protein
group_1270	BY21311_01288	DPMP315_00301	metalloprotease TldD [Pectobacterium]
group_1271	BY21311_00342	DPMP315_03900	arabinose-5-phosphate isomerase KdsD [Pectobacterium]
group_1272	BY21311_02308	DPMP315_01864	ABC transporter permease [Pectobacterium]
group_1273	BY21311_00674	DPMP315_04376	lipoprotein NlpI [Pectobacterium]
group_1274	BY21311_00535	DPMP315_01063	cell division protein ZapA [Pectobacterium]
group_1275	BY21311_00362	DPMP315_03920	TIGR01212 family radical SAM protein [Pectobacterium]
group_1276	BY21311_01896	DPMP315_02336	hypothetical protein
group_1277	BY21311_04063	DPMP315_03226	DJ-1/PfpI family protein [Pectobacterium]
group_1278	BY21311_00089	DPMP315_03135	hypothetical protein [Pectobacterium]
group_1279	BY21311_01103	DPMP315_00114	molecular chaperone Skp [Pectobacterium]
group_128	BY21311_00897	DPMP315_00531	LysR family transcriptional regulator [Pectobacterium]
group_1280	BY21311_03755	DPMP315_02908	peroxide stress protein YaaA [Pectobacterium]
group_1281	BY21311_04225	DPMP315_00732	YicC family protein [Pectobacterium]
group_1282	BY21311_03566	DPMP315_02725	ATP-grasp domain-containing protein [Pectobacterium]
group_1283	BY21311_00211	DPMP315_03093	acetolactate synthase 2 catalytic subunit [Pectobacterium]
group_1284	BY21311_00009	DPMP315_01542	FadR family transcriptional regulator [Pectobacterium]
group_1285	BY21311_00275	DPMP315_03060	NAD(+) diphosphatase [Pectobacterium]
group_1286	BY21311_02105	DPMP315_01720	two-component system response regulator RssB [Pectobacterium]
group_1287	BY21311_03004	DPMP315_03383	methionine synthase [Pectobacterium]
group_1288	BY21311_00747	DPMP315_02639	type II and III secretion system protein family protein [Pectobacterium]
group_1289	BY21311_02884	DPMP315_03287	NADH-quinone oxidoreductase subunit A [Pectobacterium]
group_129	BY21311_00910	DPMP315_00543	hypothetical protein
group_1290	BY21311_01525	DPMP315_04243	iron transporter [Pectobacterium]
group_1291	BY21311_00651	DPMP315_04397	50S ribosomal protein L21 [Bacteria]
group_1292	BY21311_01860	DPMP315_02372	2-hydroxycarboxylate transporter family protein [Pectobacterium]
group_1293	BY21311_00477	DPMP315_01003	cupin domain-containing protein [Pectobacterium]
group_1294	BY21311_03032	DPMP315_03411	UDP-2,3-diacylglucosamine diphosphatase [Pectobacterium]
group_1295	BY21311_03968	DPMP315_01410	ABC transporter permease [Pectobacterium]
group_1296	BY21311_02519	DPMP315_02561	major outer membrane lipoprotein [Pectobacteriaceae]
group_1297	BY21311_04144	DPMP315_04121	HTH-type transcriptional activator IlvY [Pectobacterium]
group_1298	BY21311_02947	DPMP315_03350	hypothetical protein [Pectobacterium]
group_1299	BY21311_03885	DPMP315_02379	hypothetical protein
group_13	BY21311_01002 BY21311_02725 BY21311_02994	DPMP315_00011 DPMP315_02260	DNA repair protein RadC [Pectobacterium]
group_130	BY21311_00921	DPMP315_00559	ParA family protein [Pectobacterium]
group_1300	BY21311_03132	DPMP315_03510	inositol-1-monophosphatase [Pectobacterium]
group_1301	BY21311_03197	DPMP315_02196	sulfate ABC transporter permease subunit CysT [Pectobacterium]
group_1302	BY21311_02498	DPMP315_02540	heme lyase CcmF/NrfE family subunit [Pectobacterium]
group_1303	BY21311_02061	DPMP315_01677	fumarylacetoacetate hydrolase family protein [Pectobacterium]
group_1304	BY21311_00739	DPMP315_02631	kdo(2)-lipid IV(A) palmitoleoyltransferase [Pectobacterium]
group_1305	BY21311_02279	DPMP315_01833	type III secretion protein HrpT [Pectobacterium]
group_1306	BY21311_03693	DPMP315_02847	division/cell wall cluster transcriptional repressor MraZ [Pectobacterium]
group_1307	BY21311_03734	DPMP315_02887	LysE family translocator [Pectobacterium]
group_1308	BY21311_01394	DPMP315_00407	cell envelope integrity protein TolA [Pectobacterium]
group_1309	BY21311_03861	DPMP315_02676	hypothetical protein
group_131	BY21311_00922	DPMP315_00561	hypothetical protein [Pectobacterium]
group_1310	BY21311_02919	DPMP315_03322	elongation factor P hydroxylase [Pectobacterium]
group_1311	BY21311_02620	DPMP315_01278	sulfurtransferase TusE [Pectobacterium]
group_1312	BY21311_00374	DPMP315_03931	type II toxin-antitoxin system RelE/ParE family toxin [Pectobacterium]
group_1313	BY21311_00662	DPMP315_04386	preprotein translocase subunit SecG [Pectobacterium]
group_1314	BY21311_03782	DPMP315_02935	YhcH/YjgK/YiaL family protein [Pectobacterium]
group_1315	BY21311_01591	DPMP315_04309	helix-turn-helix domain-containing protein [Pectobacterium]
group_1316	BY21311_02539	DPMP315_01201	heme ABC transporter ATP-binding protein [Pectobacterium]
group_1317	BY21311_01898	DPMP315_02334	quinone-dependent dihydroorotate dehydrogenase [Pectobacterium]
group_1318	BY21311_02085	DPMP315_01700	glyceraldehyde-3-phosphate dehydrogenase [Pectobacterium]
group_1319	BY21311_00189	DPMP315_01103	LacI family DNA-binding transcriptional regulator [Pectobacterium]
group_132	BY21311_00929	DPMP315_00565	hypothetical protein
group_1320	BY21311_03062	DPMP315_03442	arabinogalactan endo-beta-1,4-galactanase [Pectobacterium]
group_1321	BY21311_03276	DPMP315_01341	recombinase RecA [Pectobacterium]
group_1322	BY21311_03772	DPMP315_02925	ribose-5-phosphate isomerase RpiA [Pectobacterium]
group_1323	BY21311_01042	DPMP315_00057	RNA pyrophosphohydrolase [Pectobacterium]
group_1324	BY21311_01199	DPMP315_00212	DNA-binding protein HU-beta [Pectobacteriaceae]
group_1325	BY21311_03811	DPMP315_02963	RNA chaperone Hfq [Pectobacterium]
group_1326	BY21311_03518	DPMP315_00773	30S ribosomal protein S6 [Pectobacteriaceae]
group_1327	BY21311_00612	DPMP315_04433	transcriptional regulator ExuR [Pectobacterium]
group_1328	BY21311_00179	DPMP315_01113	iron ABC transporter permease [Pectobacterium]
group_1329	BY21311_02556	DPMP315_01218	lipoprotein-releasing ABC transporter permease subunit LolC [Pectobacterium]
group_133	BY21311_00930	DPMP315_00566	hypothetical protein [Pectobacterium]
group_1330	BY21311_02209	DPMP315_00880	Re/Si-specific NAD(P)(+) transhydrogenase subunit beta [Pectobacterium]
group_1331	BY21311_03875	DPMP315_02692	1-acyl-sn-glycerol-3-phosphate acyltransferase [Pectobacterium]
group_1332	BY21311_03727	DPMP315_02880	16S rRNA (adenine(1518)-N(6)/adenine(1519)-N(6))-dimethyltransferase RsmA [Pectobacterium]
group_1333	BY21311_02011	DPMP315_01627	50S ribosomal protein L20 [Pectobacterium]
group_1334	BY21311_03473	DPMP315_00816	glycerate kinase [Pectobacterium]
group_1335	BY21311_00093	DPMP315_03131	hypothetical protein
group_1336	BY21311_03916	DPMP315_02410	30S ribosomal protein S3 [Enterobacterales]
group_1337	BY21311_04033	DPMP315_01474	DeoR/GlpR family transcriptional regulator [Pectobacterium]
group_1338	BY21311_00332	DPMP315_03890	nucleoside diphosphate kinase regulator [Pectobacterium]
group_1339	BY21311_01073	DPMP315_00085	tRNA cyclic N6-threonylcarbamoyladenosine(37) synthase TcdA [Pectobacterium]
group_134	BY21311_00933	DPMP315_00567	STY4528 family pathogenicity island replication protein [Pectobacterium]
group_1340	BY21311_02862	DPMP315_03265	heme anaerobic degradation radical SAM methyltransferase ChuW/HutW [Pectobacterium]
group_1341	BY21311_02956	DPMP315_03359	type II secretion system protein N [Pectobacterium]
group_1342	BY21311_04133	DPMP315_04108	ECA polysaccharide chain length modulation protein [Pectobacterium]
group_1343	BY21311_00806	DPMP315_02597	nucleotide exchange factor GrpE [Pectobacterium]
group_1344	BY21311_03609	DPMP315_02763	HpcH/HpaI aldolase/citrate lyase family protein [Pectobacterium]
group_1345	BY21311_04349	DPMP315_03027	D-ribose pyranase [Pectobacterium]
group_1346	BY21311_01173	DPMP315_00186	hypothetical protein
group_1347	BY21311_00758	DPMP315_02650	TolC family protein [Pectobacterium]
group_1348	BY21311_02569	DPMP315_01230	penicillin-binding protein activator LpoB [Pectobacterium]
group_1349	BY21311_03918	DPMP315_02412	30S ribosomal protein S19 [Bacteria]
group_135	BY21311_00935	DPMP315_00569	DNA topoisomerase III [Pectobacterium]
group_1350	BY21311_04029	DPMP315_01470	Fe-S biogenesis protein NfuA [Pectobacterium]
group_1351	BY21311_03051	DPMP315_03430	MarR family transcriptional regulator [Pectobacterium]
group_1352	BY21311_00487	DPMP315_01012	serine acetyltransferase [Pectobacterium]
group_1353	BY21311_03764	DPMP315_02917	inosine/xanthosine triphosphatase [Pectobacterium]
group_1354	BY21311_00684	DPMP315_04366	phosphopentomutase [Pectobacterium]
group_1355	BY21311_01099	DPMP315_00110	(2E,6E)-farnesyl-diphosphate-specific ditrans,polycis-undecaprenyl-diphosphate synthase [Pectobacterium]
group_1356	BY21311_02851	DPMP315_03254	cytochrome ubiquinol oxidase subunit I [Pectobacterium]
group_1357	BY21311_00205	DPMP315_03099	ABC transporter permease [Pectobacterium]
group_1358	BY21311_00261	DPMP315_03046	50S ribosomal protein L7/L12 [Pectobacterium]
group_1359	BY21311_00079	DPMP315_03143	MFS transporter [Pectobacterium]
group_136	BY21311_00936	DPMP315_00570	STY4534 family ICE replication protein [Pectobacterium]
group_1360	BY21311_03516	DPMP315_00775	30S ribosomal protein S18 [Enterobacterales]
group_1361	BY21311_04317	DPMP315_00645	guanylate kinase [Pectobacterium]
group_1362	BY21311_03278	DPMP315_01343	hypothetical protein [Pectobacterium]
group_1363	BY21311_00312	DPMP315_03870	acetyl-CoA carboxylase biotin carboxylase subunit [Pectobacterium]
group_1364	BY21311_03162	DPMP315_02160	type I secretion system permease/ATPase [Pectobacterium]
group_1365	BY21311_01474	DPMP315_04191	extracellular solute-binding protein [Pectobacterium]
group_1366	BY21311_01766	DPMP315_03695	KTSC domain-containing protein [Pectobacterium]
group_1367	BY21311_01178	DPMP315_00191	thiamine-phosphate kinase [Pectobacterium]
group_1368	BY21311_03913	DPMP315_02407	30S ribosomal protein S17 [Pectobacterium]
group_1369	BY21311_01262	DPMP315_00274	YfaZ family outer membrane protein [Pectobacterium]
group_137	BY21311_00938	DPMP315_00574	TcpQ domain-containing protein [Pectobacterium]
group_1370	BY21311_00198	DPMP315_01094	glutamate racemase [Pectobacterium]
group_1371	BY21311_03250	DPMP315_01315	23S rRNA pseudouridine(1911/1915/1917) synthase RluD [Pectobacterium]
group_1372	BY21311_01076	DPMP315_00088	YgdI/YgdR family lipoprotein [Pectobacterium]
group_1373	BY21311_00621	DPMP315_04424	23S rRNA (guanine(1835)-N(2))-methyltransferase RlmG [Pectobacterium]
group_1374	BY21311_01514	DPMP315_04232	MASE1 domain-containing protein [Pectobacterium]
group_1375	BY21311_03242	DPMP315_02240	class I SAM-dependent methyltransferase [Pectobacterium]
group_1376	BY21311_03746	DPMP315_02899	transcriptional activator NhaR [Pectobacterium]
group_1377	BY21311_02077	DPMP315_01692	D-amino acid dehydrogenase [Pectobacterium]
group_1378	BY21311_04335	DPMP315_00628	ribosome biogenesis GTP-binding protein YihA/YsxC [Pectobacterium]
group_1379	BY21311_01809	DPMP315_03657	heavy metal-binding domain-containing protein [Pectobacterium]
group_138	BY21311_00946	DPMP315_00582	lytic transglycosylase domain-containing protein [Pectobacterium]
group_1380	BY21311_02342	DPMP315_01898	hypothetical protein
group_1381	BY21311_00452	DPMP315_04013	RidA family protein [Pectobacterium]
group_1382	BY21311_02489	DPMP315_02531	chaperone NapD [Pectobacterium]
group_1383	BY21311_02553	DPMP315_01215	N-acetylglucosamine kinase [Pectobacterium]
group_1384	BY21311_01375	DPMP315_00388	5-oxoprolinase subunit PxpA [Pectobacterium]
group_1385	BY21311_04018	DPMP315_01459	CpmJ protein [Pectobacterium]
group_1386	BY21311_03273	DPMP315_01338	carbon storage regulator CsrA [Enterobacterales]
group_1387	BY21311_01790	DPMP315_03670	30S ribosomal protein S6--L-glutamate ligase [Pectobacterium]
group_1388	BY21311_02350	DPMP315_01906	YceI family protein [Pectobacterium]
group_1389	BY21311_02699	DPMP315_02288	anti-sigma-28 factor FlgM [Pectobacterium]
group_139	BY21311_00950	DPMP315_00587	site-specific integrase [Pectobacterium]
group_1390	BY21311_01534	DPMP315_04251	HTH-type transcriptional regulator Cbl [Pectobacterium]
group_1391	BY21311_02970	DPMP315_03373	type II secretion system assembly factor GspB [Pectobacterium]
group_1392	BY21311_04016	DPMP315_01457	5-dehydro-4-deoxy-D-glucuronate isomerase [Pectobacterium]
group_1393	BY21311_03933	DPMP315_02427	sulfurtransferase complex subunit TusD [Pectobacterium]
group_1394	BY21311_02122	DPMP315_01737	acyl-CoA thioester hydrolase YciA [Pectobacterium]
group_1395	BY21311_01331	DPMP315_00344	zinc ribbon-containing protein [Pectobacterium]
group_1396	BY21311_01759	DPMP315_03702	LysR family transcriptional regulator [Pectobacterium]
group_1397	BY21311_02399	DPMP315_01955	peptide ABC transporter ATP-binding protein SapD [Pectobacterium]
group_1398	BY21311_01251	DPMP315_00263	DNA topoisomerase (ATP-hydrolyzing) subunit A [Pectobacterium]
group_1399	BY21311_04371	DPMP315_03005	bifunctional UDP-N-acetylglucosamine diphosphorylase/glucosamine-1-phosphate N-acetyltransferase GlmU [Pectobacterium]
group_14	BY21311_00464 BY21311_02736	DPMP315_04037 DPMP315_02247	hypothetical protein
group_140	BY21311_00952	DPMP315_00594	TIGR03759 family integrating conjugative element protein [Pectobacterium]
group_1400	BY21311_03513	DPMP315_00778	Opacity-associated protein A [Pectobacterium]
group_1401	BY21311_04234	DPMP315_00727	hypothetical protein [Pectobacterium]
group_1402	BY21311_01274	DPMP315_00287	phosphoribosylformylglycinamidine cyclo-ligase [Pectobacterium]
group_1403	BY21311_03748	DPMP315_02901	molecular chaperone DnaJ [Pectobacterium]
group_1404	BY21311_01078	DPMP315_00090	hypothetical protein
group_1405	BY21311_01582	DPMP315_04300	LuxR family transcriptional regulator [Pectobacterium]
group_1406	BY21311_00803	DPMP315_02600	outer membrane protein assembly factor BamE [Pectobacterium]
group_1407	BY21311_04136	DPMP315_04111	thioredoxin TrxA [Pectobacterium]
group_1408	BY21311_02210	DPMP315_00879	Re/Si-specific NAD(P)(+) transhydrogenase subunit alpha [Pectobacterium]
group_1409	BY21311_01176	DPMP315_00189	6,7-dimethyl-8-ribityllumazine synthase [Pectobacterium]
group_141	BY21311_00953	DPMP315_00595	transglycosylase SLT domain-containing protein [Pectobacterium]
group_1410	BY21311_00098	DPMP315_01190	cellulose synthase complex periplasmic endoglucanase BcsZ [Pectobacterium]
group_1411	BY21311_00405	DPMP315_03963	AraC family transcriptional regulator [Pectobacterium]
group_1412	BY21311_04038	DPMP315_01479	MFS transporter [Pectobacterium]
group_1413	BY21311_02900	DPMP315_03303	histidine ABC transporter ATP-binding protein HisP [Pectobacterium]
group_1414	BY21311_04090	DPMP315_04065	cyclase family protein [Pectobacterium]
group_1415	BY21311_00537	DPMP315_01065	multifunctional transcriptional regulator/nicotinamide-nucleotide adenylyltransferase/ribosylnicotinamide kinase NadR [Pectobacterium]
group_1416	BY21311_01718	DPMP315_03753	glutamine ABC transporter substrate-binding protein GlnH [Pectobacterium]
group_1417	BY21311_02187	DPMP315_00901	hypothetical protein
group_1418	BY21311_02260	DPMP315_01814	GntR family transcriptional regulator [Pectobacterium]
group_1419	BY21311_01284	DPMP315_00297	phosphoribosylaminoimidazolesuccinocarboxamide synthase [Pectobacterium]
group_142	BY21311_00957	DPMP315_00599	TIGR03747 family integrating conjugative element membrane protein [Pectobacterium]
group_1420	BY21311_00411	DPMP315_03969	TRAP transporter small permease [Pectobacterium]
group_1421	BY21311_00726	DPMP315_04324	hypothetical protein
group_1422	BY21311_00917	DPMP315_00551	GNAT family N-acetyltransferase [Pectobacterium]
group_1423	BY21311_01088	DPMP315_00100	flavodoxin [Pectobacterium]
group_1424	BY21311_02493	DPMP315_02535	nitrate reductase cytochrome c-type subunit [Pectobacterium]
group_1425	BY21311_03698	DPMP315_02852	acetolactate synthase 3 large subunit [Pectobacterium]
group_1426	BY21311_03641	DPMP315_02794	substrate-binding domain-containing protein [Pectobacterium]
group_1427	BY21311_00592	DPMP315_04451	co-chaperone GroES [Pectobacterium]
group_1428	BY21311_04159	DPMP315_04135	6-phosphofructokinase [Pectobacterium]
group_1429	BY21311_04365	DPMP315_03011	F0F1 ATP synthase subunit delta [Pectobacterium]
group_143	BY21311_00959	DPMP315_00602	hypothetical protein [Pectobacterium]
group_1430	BY21311_01685	DPMP315_03786	hypothetical protein
group_1431	BY21311_03408	DPMP315_03202	L-valine transporter subunit YgaH [Pectobacterium]
group_1432	BY21311_02526	DPMP315_02568	Fe-S cluster assembly scaffold SufA [Pectobacterium]
group_1433	BY21311_01964	DPMP315_01580	RNA chaperone/antiterminator CspA [Pectobacterium]
group_1434	BY21311_01297	DPMP315_00310	hypothetical protein [Pectobacterium]
group_1435	BY21311_03420	DPMP315_03190	MFS transporter [Pectobacterium]
group_1436	BY21311_01340	DPMP315_00353	tRNA (N6-isopentenyl adenosine(37)-C2)-methylthiotransferase MiaB [Pectobacterium]
group_1437	BY21311_00277	DPMP315_03062	deoxyribonuclease V [Pectobacterium]
group_1438	BY21311_02107	DPMP315_01722	DNA-binding transcriptional regulator H-NS [Pectobacterium]
group_1439	BY21311_03944	DPMP315_02438	YheV family putative metal-binding protein [Pectobacterium]
group_144	BY21311_00961	DPMP315_00604	TIGR03745 family integrating conjugative element membrane protein [Pectobacterium]
group_1440	BY21311_00745	DPMP315_02637	prepilin peptidase [Pectobacterium]
group_1441	BY21311_04168	DPMP315_04144	phosphoenolpyruvate carboxylase [Pectobacterium]
group_1442	BY21311_01106	DPMP315_00117	acyl-ACP--UDP-N-acetylglucosamine O-acyltransferase [Pectobacterium]
group_1443	BY21311_04068	DPMP315_04044	PTS system mannose/fructose/sorbose family transporter subunit IID [Pectobacterium]
group_1444	BY21311_02945	DPMP315_03348	hypothetical protein [Pectobacterium]
group_1445	BY21311_00992	DPMP315_00032	DMT family transporter [Pectobacterium]
group_1446	BY21311_00517	DPMP315_01043	YagU family protein [Pectobacterium]
group_1447	BY21311_02298	DPMP315_01852	hypothetical protein
group_1448	BY21311_01385	DPMP315_00398	ADP-forming succinate--CoA ligase subunit beta [Pectobacterium]
group_1449	BY21311_03195	DPMP315_02194	sulfate ABC transporter ATP-binding protein [Pectobacterium]
group_145	BY21311_00964	DPMP315_00607	TIGR03749 family integrating conjugative element protein [Pectobacterium]
group_1450	BY21311_00780	DPMP315_02618	hypothetical protein [Pectobacterium]
group_1451	BY21311_03283	DPMP315_01348	LysR family transcriptional regulator [Pectobacterium]
group_1452	BY21311_02500	DPMP315_02542	heme exporter protein CcmD [Pectobacterium]
group_1453	BY21311_02528	DPMP315_02570	hotdog fold thioesterase [Pectobacterium]
group_1454	BY21311_01652	DPMP315_03819	hypothetical protein
group_1455	BY21311_01188	DPMP315_00201	cytochrome o ubiquinol oxidase subunit IV [Pectobacterium]
group_1456	BY21311_02717	DPMP315_02270	protein DsrB [Pectobacterium]
group_1457	BY21311_01943	DPMP315_00960	LacI family transcriptional regulator [Pectobacterium]
group_1458	BY21311_04059	DPMP315_03222	gluconokinase [Pectobacterium]
group_1459	BY21311_01305	DPMP315_00318	hypothetical protein [Pectobacterium]
group_146	BY21311_00965	DPMP315_00608	TIGR03752 family integrating conjugative element protein [Pectobacterium]
group_1460	BY21311_02383	DPMP315_01939	PTS lactose/cellobiose transporter subunit IIA [Pectobacterium]
group_1461	BY21311_00130	DPMP315_01159	high-affinity branched-chain amino acid ABC transporter ATP-binding protein LivF [Pectobacterium]
group_1462	BY21311_00700	DPMP315_04350	hypothetical protein
group_1463	BY21311_01212	DPMP315_00225	YbaY family lipoprotein [Pectobacterium]
group_1464	BY21311_00728	DPMP315_04322	bifunctional protein-disulfide isomerase/oxidoreductase DsbC [Pectobacterium]
group_1465	BY21311_03341	DPMP315_01403	type VI secretion system baseplate subunit TssE [Pectobacterium]
group_1466	BY21311_02087	DPMP315_01702	YeaC family protein [Pectobacterium]
group_1467	BY21311_02580	DPMP315_01240	aminodeoxychorismate lyase [Pectobacterium]
group_1468	BY21311_02436	DPMP315_01992	glutathione transferase GstA [Pectobacterium]
group_1469	BY21311_01235	DPMP315_00247	carbon starvation protein A [Pectobacterium]
group_147	BY21311_00968	DPMP315_00610	TIGR03751 family conjugal transfer lipoprotein [Pectobacterium]
group_1470	BY21311_00472	DPMP315_00997	hypothetical protein
group_1471	BY21311_03037	DPMP315_03416	helix-turn-helix domain-containing protein [Pectobacterium]
group_1472	BY21311_03857	DPMP315_02672	fumarate reductase subunit FrdC [Pectobacterium]
group_1473	BY21311_04275	DPMP315_00687	sulfite exporter TauE/SafE family protein [Pectobacterium]
group_1474	BY21311_00246	DPMP315_03542	menaquinone-dependent protoporphyrinogen IX dehydrogenase [Pectobacterium]
group_1475	BY21311_00742	DPMP315_02634	response regulator transcription factor [Pectobacterium]
group_1476	BY21311_01355	DPMP315_00368	ferric iron uptake transcriptional regulator [Pectobacterium]
group_1477	BY21311_03910	DPMP315_02404	50S ribosomal protein L5 [Pectobacteriaceae]
group_1478	BY21311_03092	DPMP315_03471	GNAT family N-acetyltransferase [Pectobacterium]
group_1479	BY21311_00826	DPMP315_02577	4-hydroxythreonine-4-phosphate dehydrogenase PdxA [Pectobacterium]
group_148	BY21311_00969	DPMP315_00611	conjugative transfer ATPase [Pectobacterium]
group_1480	BY21311_01682	DPMP315_03789	aspartate aminotransferase family protein [Pectobacterium]
group_1481	BY21311_01511	DPMP315_04229	iron ABC transporter permease [Pectobacterium]
group_1482	BY21311_02370	DPMP315_01926	2-hydroxyacid dehydrogenase [Pectobacterium]
group_1483	BY21311_04362	DPMP315_03014	F0F1 ATP synthase subunit A [Pectobacterium]
group_1484	BY21311_00845	DPMP315_00481	sulfate/thiosulfate ABC transporter permease CysW [Pectobacterium]
group_1485	BY21311_02542	DPMP315_01204	hypothetical protein [Pectobacterium]
group_1486	BY21311_02892	DPMP315_03295	acetate kinase [Pectobacterium]
group_1487	BY21311_04089	DPMP315_04064	magnesium/cobalt transporter CorA [Pectobacterium]
group_1488	BY21311_01793	DPMP315_03667	putrescine ABC transporter ATP-binding subunit PotG [Pectobacterium]
group_1489	BY21311_02353	DPMP315_01909	two-component system sensor histidine kinase RstB [Pectobacterium]
group_149	BY21311_00977	DPMP315_00615	TIGR03756 family integrating conjugative element protein [Pectobacterium]
group_1490	BY21311_00225	DPMP315_03079	SCP2 domain-containing protein [Pectobacterium]
group_1491	BY21311_02057	DPMP315_01673	cell division topological specificity factor MinE [Pectobacteriaceae]
group_1492	BY21311_04211	DPMP315_00746	dUTP diphosphatase [Pectobacterium]
group_1493	BY21311_02550	DPMP315_01212	Crp/Fnr family transcriptional regulator [Pectobacterium]
group_1494	BY21311_03458	DPMP315_00832	SDR family oxidoreductase [Pectobacterium]
group_1495	BY21311_02416	DPMP315_01972	lipopolysaccharide assembly protein LapB [Pectobacterium]
group_1496	BY21311_04374	DPMP315_03002	phosphate ABC transporter substrate-binding protein PstS [Pectobacterium]
group_1497	BY21311_03510	DPMP315_00781	iron-sulfur cluster repair protein YtfE [Pectobacterium]
group_1498	BY21311_02599	DPMP315_01259	YceI family protein [Pectobacterium]
group_1499	BY21311_01838	DPMP315_03630	formate C-acetyltransferase [Pectobacterium]
group_150	BY21311_00978	DPMP315_00616	integrating conjugative element protein [Pectobacterium]
group_1500	BY21311_01058	DPMP315_00070	L-talarate/galactarate dehydratase [Pectobacterium]
group_1501	BY21311_01531	DPMP315_04248	TlpA family protein disulfide reductase [Pectobacterium]
group_1502	BY21311_00667	DPMP315_04382	transcription termination factor NusA [Pectobacterium]
group_1503	BY21311_03930	DPMP315_02424	30S ribosomal protein S12 [Pectobacteriaceae]
group_1504	BY21311_01614	DPMP315_02493	YqaE/Pmp3 family membrane protein [Pectobacterium]
group_1505	BY21311_01816	DPMP315_03650	cold shock-like protein CspD [Pectobacterium]
group_1506	BY21311_00800	DPMP315_02603	SsrA-binding protein SmpB [Pectobacterium]
group_1507	BY21311_02213	DPMP315_00876	invasion regulator SirB1 [Pectobacterium]
group_1508	BY21311_03049	DPMP315_03428	hypothetical protein
group_1509	BY21311_00291	DPMP315_03849	amino acid ABC transporter substrate-binding protein [Pectobacterium]
group_151	BY21311_00999	DPMP315_00005	hypothetical protein [Pectobacterium]
group_1510	BY21311_01382	DPMP315_00395	succinate dehydrogenase iron-sulfur subunit [Pectobacterium]
group_1511	BY21311_03707	DPMP315_02861	methyl-accepting chemotaxis protein [Pectobacterium]
group_1512	BY21311_02438	DPMP315_01994	tyrosine--tRNA ligase [Pectobacterium]
group_1513	BY21311_03794	DPMP315_02946	M48 family metallopeptidase [Pectobacterium]
group_1514	BY21311_02942	DPMP315_03345	lysozyme inhibitor LprI family protein [Pectobacterium]
group_1515	BY21311_03124	DPMP315_03502	ISC system 2Fe-2S type ferredoxin [Pectobacterium]
group_1516	BY21311_04397	DPMP315_01567	hypothetical protein
group_1517	BY21311_00649	DPMP315_04399	putative DNA-binding transcriptional regulator [Pectobacterium]
group_1518	BY21311_02867	DPMP315_03270	GNAT family N-acetyltransferase [Pectobacterium]
group_1519	BY21311_03644	DPMP315_02797	PTS sugar transporter subunit IIA [Pectobacterium]
group_152	BY21311_01003	DPMP315_00012	hypothetical protein [Pectobacterium]
group_1520	BY21311_02680	DPMP315_02307	flagellar motor switch protein FliM [Pectobacterium]
group_1521	BY21311_02903	DPMP315_03306	lysine/arginine/ornithine ABC transporter substrate-binding protein [Pectobacterium]
group_1522	BY21311_01789	DPMP315_03671	oxygen-insensitive NADPH nitroreductase [Pectobacterium]
group_1523	BY21311_00853	DPMP315_00490	phosphocarrier protein Hpr [Pectobacterium]
group_1524	BY21311_03722	DPMP315_02875	bifunctional tRNA pseudouridine(32) synthase/23S rRNA pseudouridine(746) synthase RluA [Pectobacterium]
group_1525	BY21311_02345	DPMP315_01901	sodium-potassium/proton antiporter ChaA [Pectobacterium]
group_1526	BY21311_00455	DPMP315_04016	leucyl aminopeptidase [Pectobacterium]
group_1527	BY21311_00414	DPMP315_03972	TonB system transport protein ExbD [Pectobacterium]
group_1528	BY21311_03419	DPMP315_03191	YfiM family lipoprotein [Pectobacterium]
group_1529	BY21311_04332	DPMP315_00631	hypothetical protein
group_153	BY21311_01005	DPMP315_00015	hypothetical protein [Pectobacterium]
group_1530	BY21311_03998	DPMP315_01439	Hsp33 family molecular chaperone HslO [Pectobacterium]
group_1531	BY21311_02326	DPMP315_01882	hypothetical protein [Pectobacterium]
group_1532	BY21311_01890	DPMP315_02342	YcbK family protein [Pectobacterium]
group_1533	BY21311_03363	DPMP315_02122	5-carboxymethyl-2-hydroxymuconate Delta-isomerase [Pectobacterium]
group_1534	BY21311_01905	DPMP315_02327	membrane integrity-associated transporter subunit PqiC [Pectobacterium]
group_1535	BY21311_02600	DPMP315_01260	rhodanese-related sulfurtransferase [Pectobacterium]
group_1536	BY21311_02148	DPMP315_01763	electron transport complex subunit RsxB [Pectobacterium]
group_1537	BY21311_02191	DPMP315_00897	TetR family transcriptional regulator [Pectobacterium]
group_1538	BY21311_01139	DPMP315_00153	HlyD family type I secretion periplasmic adaptor subunit [Pectobacterium]
group_1539	BY21311_03423	DPMP315_00867	D-glycero-beta-D-manno-heptose 1,7-bisphosphate 7-phosphatase [Pectobacterium]
group_154	BY21311_01006	DPMP315_00016	ArdC-like ssDNA-binding domain-containing protein [Pectobacterium]
group_1540	BY21311_04179	DPMP315_04155	carboxylate/amino acid/amine transporter [Pectobacterium]
group_1541	BY21311_02046	DPMP315_01662	TerC family protein [Pectobacterium]
group_1542	BY21311_01201	DPMP315_00214	helix-hairpin-helix domain-containing protein [Pectobacterium]
group_1543	BY21311_01039	DPMP315_00054	YgdI/YgdR family lipoprotein [Pectobacterium]
group_1544	BY21311_01859	DPMP315_02373	sensor histidine kinase [Pectobacterium]
group_1545	BY21311_03167	DPMP315_02165	holo-ACP synthase [Pectobacterium]
group_1546	BY21311_04079	DPMP315_04054	glycerol-3-phosphate transporter [Pectobacterium]
group_1547	BY21311_02503	DPMP315_02545	cytochrome c biogenesis heme-transporting ATPase CcmA [Pectobacterium]
group_1548	BY21311_02146	DPMP315_01761	electron transport complex subunit RsxD [Pectobacterium]
group_1549	BY21311_04312	DPMP315_00650	hypothetical protein
group_155	BY21311_01007	DPMP315_00017	hypothetical protein [Pectobacterium]
group_1550	BY21311_03439	DPMP315_00851	amino acid ABC transporter ATP-binding protein [Pectobacterium]
group_1551	BY21311_00434	DPMP315_03996	helix-turn-helix transcriptional regulator [Pectobacterium]
group_1552	BY21311_01627	DPMP315_02480	cytidine deaminase [Pectobacterium]
group_1553	BY21311_00013	DPMP315_01539	PTS sugar transporter subunit IIB [Pectobacterium]
group_1554	BY21311_01147	DPMP315_00161	hypothetical protein
group_1555	BY21311_03228	DPMP315_02226	hypoxanthine phosphoribosyltransferase [Pectobacterium]
group_1556	BY21311_03344	DPMP315_01406	hypothetical protein
group_1557	BY21311_01505	DPMP315_04223	NADP-dependent oxidoreductase [Pectobacterium]
group_1558	BY21311_02459	DPMP315_02013	LutB/LldF family L-lactate oxidation iron-sulfur protein [Pectobacterium]
group_1559	BY21311_02583	DPMP315_01243	3-oxoacyl-ACP reductase FabG [Pectobacterium]
group_156	BY21311_01008	DPMP315_00018	hypothetical protein [Pectobacterium]
group_1560	BY21311_00349	DPMP315_03907	BolA family iron metabolism protein IbaG [Pectobacterium]
group_1561	BY21311_01868	DPMP315_02364	flagellar brake protein [Pectobacterium]
group_1562	BY21311_02125	DPMP315_01740	outer membrane protein OmpW [Pectobacterium]
group_1563	BY21311_00692	DPMP315_04358	ribosomal protein S18-alanine N-acetyltransferase [Pectobacterium]
group_1564	BY21311_03891	DPMP315_02385	peptide deformylase [Pectobacterium]
group_1565	BY21311_01119	DPMP315_00134	Fe(3+) dicitrate ABC transporter ATP-binding protein FecE [Pectobacterium]
group_1566	BY21311_03598	DPMP315_02752	hypothetical protein [Pectobacterium]
group_1567	BY21311_02380	DPMP315_01936	transcriptional regulator TyrR [Pectobacterium]
group_1568	BY21311_03711	DPMP315_02864	HTH-type transcriptional regulator SgrR [Pectobacterium]
group_1569	BY21311_03426	DPMP315_00864	MetQ/NlpA family lipoprotein [Pectobacterium]
group_157	BY21311_01013	DPMP315_00591	hypothetical protein
group_1570	BY21311_02865	DPMP315_03268	ABC-F family ATPase [Pectobacterium]
group_1571	BY21311_00335	DPMP315_03893	PTS IIA-like nitrogen regulatory protein PtsN [Pectobacterium]
group_1572	BY21311_03668	DPMP315_02822	type II secretion system protein GspE [Pectobacterium]
group_1573	BY21311_00255	DPMP315_03040	elongation factor Tu [Pectobacterium]
group_1574	BY21311_02043	DPMP315_01659	PTS mannose transporter subunit IID [Pectobacterium]
group_1575	BY21311_02290	DPMP315_01844	response regulator transcription factor [Pectobacterium]
group_1576	BY21311_00671	DPMP315_04379	tRNA pseudouridine(55) synthase TruB [Pectobacterium]
group_1577	BY21311_02347	DPMP315_01903	dihydromonapterin reductase [Pectobacterium]
group_1578	BY21311_00457	DPMP315_04018	LPS export ABC transporter permease LptG [Pectobacterium]
group_1579	BY21311_00856	DPMP315_00493	hypothetical protein
group_158	BY21311_01016	DPMP315_00590	conjugal transfer protein TraF [Pectobacterium]
group_1580	BY21311_00036	DPMP315_01512	glycoside hydrolase family 1 protein [Pectobacterium]
group_1581	BY21311_02906	DPMP315_03309	colicin V production protein [Pectobacterium]
group_1582	BY21311_00615	DPMP315_04430	tagaturonate reductase [Pectobacterium]
group_1583	BY21311_02881	DPMP315_03284	NADH-quinone oxidoreductase subunit NuoE [Pectobacterium sp.]
group_1584	BY21311_01863	DPMP315_02369	citrate lyase acyl carrier protein [Pectobacterium]
group_1585	BY21311_00654	DPMP315_04394	Obg family GTPase CgtA [Pectobacterium]
group_1586	BY21311_02588	DPMP315_01248	23S rRNA accumulation protein YceD [Pectobacterium]
group_1587	BY21311_03775	DPMP315_02928	arginine exporter ArgO [Pectobacterium]
group_1588	BY21311_01907	DPMP315_02325	methyl-accepting chemotaxis protein [Pectobacterium]
group_1589	BY21311_01325	DPMP315_00338	23S rRNA (pseudouridine(1915)-N(3))-methyltransferase RlmH [Pectobacterium]
group_159	BY21311_01020	DPMP315_00035	site-specific integrase [Pectobacterium]
group_1590	BY21311_03979	DPMP315_01421	M20 family metallopeptidase [Pectobacterium]
group_1591	BY21311_01994	DPMP315_01610	DNA-binding protein [Pectobacterium]
group_1592	BY21311_01267	DPMP315_00279	multifunctional acyl-CoA thioesterase I/protease I/lysophospholipase L1 [Pectobacterium]
group_1593	BY21311_04321	DPMP315_00642	tRNA (guanosine(18)-2'-O)-methyltransferase TrmH [Pectobacterium]
group_1594	BY21311_00354	DPMP315_03912	cell division protein ZapE [Pectobacterium]
group_1595	BY21311_02064	DPMP315_01680	DNA polymerase III subunit theta [Pectobacterium]
group_1596	BY21311_02444	DPMP315_01999	transcriptional regulator SlyA [Pectobacterium]
group_1597	BY21311_03731	DPMP315_02884	type 3 dihydrofolate reductase [Pectobacterium]
group_1598	BY21311_04207	DPMP315_00750	50S ribosomal protein L33 [Enterobacterales]
group_1599	BY21311_00706	DPMP315_04344	glycine cleavage system protein GcvH [Pectobacterium]
group_16	BY21311_01233 BY21311_01234	DPMP315_00246 DPMP315_02049	discoidin domain-containing protein [Pectobacterium]
group_160	BY21311_01029	DPMP315_00044	alpha/beta fold hydrolase [Pectobacterium]
group_1600	BY21311_01710	DPMP315_03761	GPW/gp25 family protein [Pectobacterium]
group_1601	BY21311_00136	DPMP315_01153	GntP family transporter [Pectobacterium]
group_1602	BY21311_02619	DPMP315_01277	FtsH protease modulator YccA [Pectobacterium]
group_1603	BY21311_02172	DPMP315_00917	hypothetical protein [Pectobacterium]
group_1604	BY21311_00551	DPMP315_01079	isochorismate synthase MenF [Pectobacterium]
group_1605	BY21311_03480	DPMP315_00809	MFS transporter [Pectobacterium]
group_1606	BY21311_01844	DPMP315_03624	30S ribosomal protein S1 [Pectobacterium]
group_1607	BY21311_00118	DPMP315_01171	hypothetical protein
group_1608	BY21311_03181	DPMP315_02179	autonomous glycyl radical cofactor GrcA [Bacteria]
group_1609	BY21311_01028	DPMP315_00043	hypothetical protein
group_161	BY21311_01034	DPMP315_00049	tRNA (guanosine(46)-N7)-methyltransferase TrmB [Pectobacterium]
group_1610	BY21311_03993	DPMP315_01434	peptidoglycan glycosyltransferase/peptidoglycan DD-transpeptidase MrcA [Pectobacterium]
group_1611	BY21311_04287	DPMP315_00675	RICIN domain-containing protein [Pectobacterium]
group_1612	BY21311_02127	DPMP315_01742	tryptophan synthase subunit alpha [Pectobacterium]
group_1613	BY21311_03666	DPMP315_02820	carboxylating nicotinate-nucleotide diphosphorylase [Pectobacterium]
group_1614	BY21311_00786	DPMP315_02612	hypothetical protein [Pectobacterium]
group_1615	BY21311_02623	DPMP315_01281	CoA-binding protein [Pectobacterium]
group_1616	BY21311_02143	DPMP315_01758	endonuclease III [Pectobacterium]
group_1617	BY21311_00819	DPMP315_02584	LacI family DNA-binding transcriptional regulator [Pectobacterium]
group_1618	BY21311_03616	DPMP315_02770	tellurite resistance TerB family protein [Pectobacterium]
group_1619	BY21311_03814	DPMP315_02966	N-acetylmuramoyl-L-alanine amidase AmiB [Pectobacterium]
group_162	BY21311_01048	DPMP315_00062	prepilin peptidase-dependent protein [Pectobacterium]
group_1620	BY21311_03035	DPMP315_03414	HAAAP family serine/threonine permease [Pectobacterium]
group_1621	BY21311_02134	DPMP315_01749	threonylcarbamoyl-AMP synthase [Pectobacterium]
group_1622	BY21311_02704	DPMP315_02283	protein phosphatase CheZ [Pectobacterium]
group_1623	BY21311_03855	DPMP315_02670	fumarate reductase (quinol) flavoprotein subunit [Pectobacterium]
group_1624	BY21311_03171	DPMP315_02169	ribonuclease III [Pectobacterium]
group_1625	BY21311_03453	DPMP315_00837	6-carboxytetrahydropterin synthase QueD [Pectobacterium]
group_1626	BY21311_01435	DPMP315_00448	formate dehydrogenase subunit beta [Pectobacterium]
group_1627	BY21311_02102	DPMP315_01717	formyltetrahydrofolate deformylase [Pectobacterium]
group_1628	BY21311_00168	DPMP315_01124	aquaporin [Pectobacterium]
group_1629	BY21311_00776	DPMP315_02622	L,D-transpeptidase family protein [Pectobacterium]
group_163	BY21311_01050	DPMP315_00064	hypothetical protein
group_1630	BY21311_00381	DPMP315_03938	hypothetical protein
group_1631	BY21311_00446	DPMP315_04007	ribonuclease E inhibitor RraB [Pectobacterium]
group_1632	BY21311_01796	DPMP315_03664	YbjO family protein [Pectobacterium]
group_1633	BY21311_02218	DPMP315_00871	lipoprotein insertase outer membrane protein LolB [Pectobacterium]
group_1634	BY21311_00597	DPMP315_04448	4-hydroxybenzoate octaprenyltransferase [Pectobacterium]
group_1635	BY21311_03509	DPMP315_00782	hypothetical protein
group_1636	BY21311_03256	DPMP315_01321	two-component system response regulator BtsR [Pectobacterium]
group_1637	BY21311_04411	DPMP315_01553	membrane protein insertase YidC [Pectobacterium]
group_1638	BY21311_01577	DPMP315_04295	MFS transporter [Pectobacterium]
group_1639	BY21311_00912	DPMP315_00545	hypothetical protein
group_164	BY21311_01056	DPMP315_00069	LacI family DNA-binding transcriptional regulator [Pectobacterium]
group_1640	BY21311_03752	DPMP315_02905	molybdopterin adenylyltransferase [Pectobacterium]
group_1641	BY21311_02182	DPMP315_00907	TetR/AcrR family transcriptional regulator [Pectobacterium]
group_1642	BY21311_03740	DPMP315_02893	4-hydroxy-3-methylbut-2-enyl diphosphate reductase [Pectobacterium]
group_1643	BY21311_02055	DPMP315_01671	long-chain-fatty-acid--CoA ligase FadD [Pectobacterium]
group_1644	BY21311_03154	DPMP315_03530	tRNA adenosine(34) deaminase TadA [Pectobacterium]
group_1645	BY21311_02014	DPMP315_01630	integration host factor subunit alpha [Pectobacterium]
group_1646	BY21311_00159	DPMP315_01133	cell-envelope stress modulator CpxP [Pectobacterium]
group_1647	BY21311_02871	DPMP315_03274	stress response protein ElaB [Pectobacterium]
group_1648	BY21311_02114	DPMP315_01729	ABC transporter ATP-binding protein [Pectobacterium]
group_1649	BY21311_02155	DPMP315_01770	L-arabinose ABC transporter permease AraH [Pectobacterium]
group_165	BY21311_01067	DPMP315_00079	M20 family metallopeptidase [Pectobacterium]
group_1650	BY21311_01217	DPMP315_00230	type B 50S ribosomal protein L31 [Pectobacterium]
group_1651	BY21311_03636	DPMP315_02789	allose kinase [Pectobacterium]
group_1652	BY21311_02369	DPMP315_01925	PAS domain-containing methyl-accepting chemotaxis protein [Pectobacterium]
group_1653	BY21311_00601	DPMP315_04444	zinc uptake transcriptional repressor Zur [Pectobacterium]
group_1654	BY21311_00984	DPMP315_00024	TetR/AcrR family transcriptional regulator [Pectobacterium]
group_1655	BY21311_01922	DPMP315_00941	arginine--tRNA ligase [Pectobacterium]
group_1656	BY21311_03258	DPMP315_01323	methyltransferase domain-containing protein [Pectobacterium]
group_1657	BY21311_03785	DPMP315_02938	3-keto-L-gulonate-6-phosphate decarboxylase UlaD [Pectobacterium]
group_1658	BY21311_02429	DPMP315_01985	GTP cyclohydrolase II [Pectobacterium]
group_1659	BY21311_01170	DPMP315_00183	preprotein translocase subunit YajC [Pectobacterium]
group_166	BY21311_01085	DPMP315_00097	hypothetical protein
group_1660	BY21311_02216	DPMP315_00873	peptide chain release factor 1 [Pectobacterium]
group_1661	BY21311_02712	DPMP315_02275	flagellar motor stator protein MotA [Pectobacterium]
group_1662	BY21311_03802	DPMP315_02954	YqgE/AlgH family protein [Pectobacterium]
group_1663	BY21311_00448	DPMP315_04009	YjgN family protein [Pectobacterium]
group_1664	BY21311_01249	DPMP315_00261	ribonucleoside-diphosphate reductase subunit alpha [Pectobacterium]
group_1665	BY21311_03909	DPMP315_02403	30S ribosomal protein S14 [Pectobacterium]
group_1666	BY21311_00512	DPMP315_01038	YoeB-YefM toxin-antitoxin system antitoxin YefM [Pectobacterium]
group_1667	BY21311_00904	DPMP315_00537	hypothetical protein [Pectobacterium]
group_1668	BY21311_02034	DPMP315_01650	fructosamine kinase family protein [Pectobacterium]
group_1669	BY21311_03705	DPMP315_02859	AzlC family ABC transporter permease [Pectobacterium]
group_167	BY21311_01091	DPMP315_00103	bifunctional uridylyltransferase/uridylyl-removing protein GlnD [Pectobacterium]
group_1670	BY21311_03618	DPMP315_02772	TerD family protein [Pectobacterium]
group_1671	BY21311_01829	DPMP315_03639	outer membrane lipoprotein chaperone LolA [Pectobacterium]
group_1672	BY21311_00244	DPMP315_03540	IMPACT family protein [Pectobacterium]
group_1673	BY21311_03741	DPMP315_02894	FKBP-type peptidyl-prolyl cis-trans isomerase [Pectobacterium]
group_1674	BY21311_03657	DPMP315_02811	hypothetical protein [Pectobacterium]
group_1675	BY21311_02317	DPMP315_01873	ABC transporter permease [Pectobacterium]
group_1676	BY21311_04410	DPMP315_01554	tRNA uridine-5-carboxymethylaminomethyl(34) synthesis GTPase MnmE [Pectobacterium]
group_1677	BY21311_03829	DPMP315_02981	hypothetical protein [Pectobacterium]
group_1678	BY21311_01882	DPMP315_02350	right-handed parallel beta-helix repeat-containing protein [Pectobacterium]
group_1679	BY21311_01071	DPMP315_00083	ABC transporter substrate-binding protein [Pectobacterium]
group_168	BY21311_01111	DPMP315_00122	VOC family protein [Pectobacterium]
group_1680	BY21311_00091	DPMP315_03133	Imm2 family immunity protein [Pectobacterium]
group_1681	BY21311_00048	DPMP315_01500	ABC transporter substrate-binding protein [Pectobacterium]
group_1682	BY21311_01636	DPMP315_02471	hypothetical protein [Pectobacterium]
group_1683	BY21311_04111	DPMP315_04086	amino acid ABC transporter ATP-binding protein [Pectobacterium]
group_1684	BY21311_00125	DPMP315_01164	aspartate 1-decarboxylase autocleavage activator PanM [Pectobacterium]
group_1685	BY21311_00645	DPMP315_04403	transcriptional regulator ArgR [Pectobacterium]
group_1686	BY21311_02029	DPMP315_01645	2-dehydro-3-deoxy-D-gluconate 5-dehydrogenase KduD [Pectobacterium]
group_1687	BY21311_02692	DPMP315_02295	flagellar basal-body rod protein FlgG [Pectobacterium]
group_1688	BY21311_03454	DPMP315_00836	7-carboxy-7-deazaguanine synthase QueE [Pectobacterium]
group_1689	BY21311_03415	DPMP315_03195	thioredoxin TrxC [Pectobacterium]
group_169	BY21311_01112	DPMP315_00123	tRNA lysidine(34) synthetase TilS [Pectobacterium]
group_1690	BY21311_03170	DPMP315_02168	GTPase Era [Pectobacterium]
group_1691	BY21311_02349	DPMP315_01905	hypothetical protein [Pectobacterium]
group_1692	BY21311_01989	DPMP315_01605	tRNA 2-thiouridine(34) synthase MnmA [Pectobacterium]
group_1693	BY21311_04378	DPMP315_02998	phosphate signaling complex protein PhoU [Pectobacterium]
group_1694	BY21311_02703	DPMP315_02284	flagellar type III secretion system protein FlhB [Pectobacterium]
group_1695	BY21311_01785	DPMP315_03676	deoxyribose-phosphate aldolase [Pectobacterium]
group_1696	BY21311_00263	DPMP315_03048	DNA-directed RNA polymerase subunit beta' [Pectobacterium]
group_1697	BY21311_02414	DPMP315_01970	stress response translation initiation inhibitor YciH [Pectobacterium]
group_1698	BY21311_02392	DPMP315_01948	phage shock protein operon transcriptional activator [Pectobacterium]
group_1699	BY21311_03760	DPMP315_02913	two-component system response regulator ArcA [Pectobacterium]
group_17	BY21311_02668 BY21311_02735	DPMP315_02319 DPMP315_02248	flagellin [Pectobacterium]
group_170	BY21311_01130	DPMP315_00144	sulfite exporter TauE/SafE family protein [Pectobacterium]
group_1700	BY21311_01154	DPMP315_00168	fructokinase [Pectobacterium]
group_1701	BY21311_02257	DPMP315_01811	urea ABC transporter permease subunit UrtC [Pectobacterium]
group_1702	BY21311_01115	DPMP315_00126	YaeQ family protein [Pectobacterium]
group_1703	BY21311_01740	DPMP315_03721	YecH family protein [Pectobacterium]
group_1704	BY21311_01638	DPMP315_02469	excinuclease ABC subunit B [Pectobacterium]
group_1705	BY21311_04209	DPMP315_00748	DNA repair protein RadC [Pectobacterium]
group_1706	BY21311_01589	DPMP315_04307	helix-turn-helix transcriptional regulator [Pectobacterium]
group_1707	BY21311_03522	DPMP315_00769	peptide chain release factor H [Pectobacterium]
group_1708	BY21311_00046	DPMP315_01502	2-hydroxycarboxylate transporter family protein [Pectobacterium]
group_1709	BY21311_01171	DPMP315_00184	protein translocase subunit SecD [Pectobacterium]
group_171	BY21311_01142	DPMP315_00156	Ig-like domain-containing protein [Pectobacterium]
group_1710	BY21311_01855	DPMP315_02377	hypothetical protein [Pectobacterium]
group_1711	BY21311_04131	DPMP315_04106	UDP-N-acetyl-D-mannosamine dehydrogenase [Pectobacterium]
group_1712	BY21311_01035	DPMP315_00050	YggL family protein [Pectobacterium]
group_1713	BY21311_00191	DPMP315_01101	methylenetetrahydrofolate reductase [Pectobacterium]
group_1714	BY21311_00600	DPMP315_04445	transcriptional repressor LexA [Pectobacterium]
group_1715	BY21311_03053	DPMP315_03433	hypothetical protein [Pectobacterium]
group_1716	BY21311_02113	DPMP315_01728	oligopeptide ABC transporter permease OppC [Pectobacterium]
group_1717	BY21311_03292	DPMP315_01360	hypothetical protein [Pectobacterium]
group_1718	BY21311_01318	DPMP315_00331	lipoyl synthase [Pectobacterium]
group_1719	BY21311_02617	DPMP315_01275	biofilm development regulator YmgB/AriR family protein [Pectobacterium]
group_172	BY21311_01202	DPMP315_00215	YbgC/FadM family acyl-CoA thioesterase [Pectobacterium]
group_1720	BY21311_01579	DPMP315_04297	AraC family transcriptional regulator [Pectobacterium]
group_1721	BY21311_02163	DPMP315_00926	mannose-6-phosphate isomerase [Pectobacterium]
group_1722	BY21311_04306	DPMP315_00656	universal stress protein UspA [Pectobacterium]
group_1723	BY21311_01181	DPMP315_00194	exodeoxyribonuclease VII small subunit [Pectobacterium]
group_1724	BY21311_03028	DPMP315_03407	ribosome-associated protein YbcJ [Pectobacterium]
group_1725	BY21311_01368	DPMP315_00381	hypothetical protein
group_1726	BY21311_00849	DPMP315_00486	response regulator transcription factor [Pectobacterium]
group_1727	BY21311_00721	DPMP315_04329	FAD assembly factor SdhE [Pectobacterium]
group_1728	BY21311_01400	DPMP315_00413	hypothetical protein
group_1729	BY21311_00416	DPMP315_03974	LacI family DNA-binding transcriptional regulator [Pectobacterium]
group_173	BY21311_01222	DPMP315_00235	primosomal replication protein [Pectobacterium]
group_1730	BY21311_01864	DPMP315_02368	citrate (pro-3S)-lyase subunit beta [Pectobacterium]
group_1731	BY21311_00229	DPMP315_03076	Sec-independent protein translocase protein TatB [Pectobacterium]
group_1732	BY21311_03391	DPMP315_02150	oxalurate catabolism protein HpxX [Pectobacterium]
group_1733	BY21311_01101	DPMP315_00112	sigma E protease regulator RseP [Pectobacterium]
group_1734	BY21311_01165	DPMP315_00178	peroxiredoxin C [Pectobacterium]
group_1735	BY21311_02248	DPMP315_01798	transporter substrate-binding domain-containing protein [Pectobacterium]
group_1736	BY21311_02324	DPMP315_01880	GlsB/YeaQ/YmgE family stress response membrane protein [Pectobacterium]
group_1737	BY21311_01239	DPMP315_00251	Cys-tRNA(Pro)/Cys-tRNA(Cys) deacylase YbaK [Pectobacterium]
group_1738	BY21311_00213	DPMP315_03091	branched-chain amino acid transaminase [Pectobacterium]
group_1739	BY21311_02044	DPMP315_01660	PTS mannose/fructose/sorbose transporter subunit IIC [Pectobacterium]
group_174	BY21311_01237	DPMP315_00249	GTPase [Pectobacterium]
group_1740	BY21311_03710	DPMP315_02863	glucose uptake inhibitor SgrT [Pectobacterium]
group_1741	BY21311_02144	DPMP315_01759	electron transport complex subunit E [Pectobacterium]
group_1742	BY21311_01247	DPMP315_00259	class I ribonucleotide reductase maintenance protein YfaE [Pectobacterium]
group_1743	BY21311_00370	DPMP315_03927	YraN family protein [Pectobacterium]
group_1744	BY21311_02750	DPMP315_03175	UvrY/SirA/GacA family response regulator transcription factor [Pectobacterium]
group_1745	BY21311_01390	DPMP315_00403	cyd operon protein YbgE [Pectobacterium]
group_1746	BY21311_01827	DPMP315_03641	leucine-responsive transcriptional regulator Lrp [Pectobacteriaceae]
group_1747	BY21311_03180	DPMP315_02178	ATP-dependent RNA helicase SrmB [Pectobacterium]
group_1748	BY21311_00436	DPMP315_03998	hypothetical protein [Pectobacterium]
group_1749	BY21311_03907	DPMP315_02401	50S ribosomal protein L6 [Pectobacterium]
group_175	BY21311_01329	DPMP315_00342	LPS assembly lipoprotein LptE [Pectobacterium]
group_1750	BY21311_01668	DPMP315_03803	epoxyqueuosine reductase QueH [Pectobacterium]
group_1751	BY21311_03730	DPMP315_02883	hypothetical protein [Pectobacterium]
group_1752	BY21311_03691	DPMP315_02845	cell division protein FtsL [Pectobacterium]
group_1753	BY21311_03648	DPMP315_02801	protein YacL [Pectobacterium]
group_1754	BY21311_03128	DPMP315_03506	Fe-S cluster assembly scaffold IscU [Pectobacterium]
group_1755	BY21311_00353	DPMP315_03911	hypothetical protein
group_1756	BY21311_00542	DPMP315_01070	peptide chain release factor 3 [Pectobacterium]
group_1757	BY21311_00233	DPMP315_03072	transcription/translation regulatory transformer protein RfaH [Pectobacterium]
group_1758	BY21311_00892	DPMP315_00526	amino acid ABC transporter permease [Pectobacterium]
group_1759	BY21311_00712	DPMP315_04338	phosphodiesterase [Pectobacterium]
group_176	BY21311_01336	DPMP315_00349	apolipoprotein N-acyltransferase [Pectobacterium]
group_1760	BY21311_03952	DPMP315_02446	OsmC family protein [Pectobacterium]
group_1761	BY21311_04087	DPMP315_04062	EamA family transporter RarD [Pectobacterium]
group_1762	BY21311_03505	DPMP315_00786	YtfJ family protein [Pectobacterium]
group_1763	BY21311_03424	DPMP315_00866	methionine ABC transporter ATP-binding protein MetN [Pectobacterium]
group_1764	BY21311_03672	DPMP315_02826	cell division protein ZapD [Pectobacterium]
group_1765	BY21311_01598	DPMP315_03838	gamma-glutamylcyclotransferase [Pectobacterium]
group_1766	BY21311_03119	DPMP315_03497	nucleoside-diphosphate kinase [Pectobacterium]
group_1767	BY21311_00369	DPMP315_03926	DnaA initiator-associating protein DiaA [Pectobacterium]
group_1768	BY21311_02264	DPMP315_01818	porin [Pectobacterium]
group_1769	BY21311_01280	DPMP315_00293	thioredoxin-dependent thiol peroxidase [Pectobacterium]
group_177	BY21311_01350	DPMP315_00363	ROK family protein [Pectobacterium]
group_1770	BY21311_00656	DPMP315_04392	transcription elongation factor GreA [Pectobacterium]
group_1771	BY21311_03039	DPMP315_03418	YolA family protein [Pectobacterium]
group_1772	BY21311_00815	DPMP315_02588	sugar ABC transporter permease [Pectobacterium]
group_1773	BY21311_02904	DPMP315_03307	UbiX family flavin prenyltransferase [Pectobacterium]
group_1774	BY21311_02681	DPMP315_02306	flagellar motor switch protein FliN [Pectobacterium]
group_1775	BY21311_00034	DPMP315_01514	PTS sugar transporter subunit IIB [Pectobacterium]
group_1776	BY21311_03147	DPMP315_03524	nitrogen regulatory protein P-II [Pectobacterium]
group_1777	BY21311_01996	DPMP315_01612	hypothetical protein [Pectobacterium]
group_1778	BY21311_03123	DPMP315_03501	Fe-S cluster assembly protein IscX [Pectobacterium]
group_1779	BY21311_02448	DPMP315_02003	Grx4 family monothiol glutaredoxin [Pectobacterium]
group_178	BY21311_01351	DPMP315_00364	N-acetylglucosamine-6-phosphate deacetylase [Pectobacterium]
group_1780	BY21311_02068	DPMP315_01683	fatty acid metabolism transcriptional regulator FadR [Pectobacterium]
group_1781	BY21311_01363	DPMP315_00376	two-component system response regulator KdpE [Pectobacterium]
group_1782	BY21311_00356	DPMP315_03914	30S ribosomal protein S9 [Pectobacterium]
group_1783	BY21311_02066	DPMP315_01681	disulfide bond formation protein DsbB [Pectobacterium]
group_1784	BY21311_02272	DPMP315_01827	type III secretion system chaperone [Pectobacterium]
group_1785	BY21311_02168	DPMP315_00921	ROK family transcriptional regulator [Pectobacterium]
group_1786	BY21311_01941	DPMP315_00958	PTS lactose/cellobiose transporter subunit IIA [Pectobacterium]
group_1787	BY21311_00658	DPMP315_04390	23S rRNA (uridine(2552)-2'-O)-methyltransferase RlmE [Pectobacterium]
group_1788	BY21311_02584	DPMP315_01244	ACP S-malonyltransferase [Pectobacterium]
group_1789	BY21311_01825	DPMP315_03642	thioredoxin-disulfide reductase [Pectobacterium]
group_179	BY21311_01352	DPMP315_00365	glucosamine-6-phosphate deaminase [Pectobacterium]
group_1790	BY21311_03265	DPMP315_01330	S-ribosylhomocysteine lyase [Pectobacterium]
group_1791	BY21311_03343	DPMP315_01405	type VI secretion system contractile sheath small subunit [Pectobacterium]
group_1792	BY21311_03905	DPMP315_02399	30S ribosomal protein S5 [Pectobacteriaceae]
group_1793	BY21311_00704	DPMP315_04346	hypothetical protein [Pectobacterium]
group_1794	BY21311_00835	DPMP315_00469	GNAT family acetyltransferase [Pectobacterium]
group_1795	BY21311_02301	DPMP315_01855	type III secretion system export apparatus subunit SctS [Pectobacterium]
group_1796	BY21311_01644	DPMP315_02463	cyclic pyranopterin monophosphate synthase MoaC [Pectobacterium]
group_1797	BY21311_01846	DPMP315_03622	bifunctional phosphoribosyl-AMP cyclohydrolase/phosphoribosyl-ATP diphosphatase HisIE [Pectobacterium]
group_1798	BY21311_00182	DPMP315_01110	met regulon transcriptional regulator MetJ [Pectobacteriaceae]
group_1799	BY21311_02823	DPMP315_03127	helix-turn-helix domain-containing protein [Pectobacterium]
era	BY21311_02730 BY21311_02989	DPMP315_02254 DPMP315_02255	GTPase Era
group_180	BY21311_01353	DPMP315_00366	N-acetylglucosamine-specific PTS transporter subunit IIBC [Pectobacterium]
group_1800	BY21311_01419	DPMP315_00432	AcrZ family multidrug efflux pump-associated protein [Pectobacterium]
group_1801	BY21311_03281	DPMP315_01346	sensor domain-containing diguanylate cyclase [Pectobacterium]
group_1802	BY21311_04260	DPMP315_00701	xylose isomerase [Pectobacterium]
group_1803	BY21311_02912	DPMP315_03315	aspartate-semialdehyde dehydrogenase [Pectobacterium]
group_1804	BY21311_02504	DPMP315_02546	heme lyase NrfEFG subunit NrfG [Pectobacterium]
group_1806	BY21311_00218	DPMP315_03086	GntR family transcriptional regulator [Pectobacterium]
group_1807	BY21311_03985	DPMP315_01427	3-dehydroquinate synthase [Pectobacterium]
group_1808	BY21311_00784	DPMP315_02614	GNAT family N-acetyltransferase [Pectobacterium]
group_1809	BY21311_01722	DPMP315_03749	outer membrane protein OmpX [Pectobacterium]
group_181	BY21311_01360	DPMP315_00373	replication initiation negative regulator SeqA [Pectobacterium]
group_1810	BY21311_03789	DPMP315_02942	class II fructose-bisphosphate aldolase [Pectobacterium]
group_1811	BY21311_01226	DPMP315_00239	YbaB/EbfC family nucleoid-associated protein [Pectobacterium]
group_1812	BY21311_03664	DPMP315_02818	1,6-anhydro-N-acetylmuramyl-L-alanine amidase AmpD [Pectobacterium]
group_1813	BY21311_02597	DPMP315_01257	biofilm formation regulator BssS [Pectobacterium]
group_1814	BY21311_02038	DPMP315_01654	metal ABC transporter substrate-binding protein [Pectobacterium]
group_1815	BY21311_02858	DPMP315_03261	glutamine amidotransferase [Pectobacterium]
group_1816	BY21311_02962	DPMP315_03365	type II secretion system minor pseudopilin GspH [Pectobacterium]
group_1817	BY21311_02706	DPMP315_02281	chemotaxis response regulator protein-glutamate methylesterase [Pectobacterium]
group_1818	BY21311_03614	DPMP315_02768	tellurium resistance TerZ family protein [Pectobacterium]
group_1819	BY21311_00172	DPMP315_01120	HslU--HslV peptidase ATPase subunit [Pectobacterium]
group_182	BY21311_01367	DPMP315_00380	potassium-transporting ATPase subunit KdpA [Pectobacterium]
group_1820	BY21311_03655	DPMP315_02809	hypothetical protein [Pectobacterium]
group_1821	BY21311_01794	DPMP315_03666	putrescine ABC transporter permease PotH [Pectobacterium]
group_1822	BY21311_01137	DPMP315_00151	pectate lyase [Pectobacterium]
group_1823	BY21311_03975	DPMP315_01417	ABC transporter permease subunit [Pectobacterium]
group_1824	BY21311_01707	DPMP315_03764	tail protein X [Pectobacterium]
group_1825	BY21311_00623	DPMP315_04422	hypothetical protein [Pectobacterium]
group_1826	BY21311_02371	DPMP315_01927	hypothetical protein
group_1827	BY21311_00259	DPMP315_03044	50S ribosomal protein L1 [Pectobacterium]
group_1828	BY21311_03254	DPMP315_01319	bifunctional chorismate mutase/prephenate dehydrogenase [Pectobacterium]
group_1829	BY21311_00751	DPMP315_02643	type II secretion system F family protein [Pectobacterium]
group_183	BY21311_01372	DPMP315_00385	type 2 GTP cyclohydrolase I [Pectobacterium]
group_1830	BY21311_00339	DPMP315_03897	lipopolysaccharide ABC transporter substrate-binding protein LptA [Pectobacterium]
group_1831	BY21311_03911	DPMP315_02405	50S ribosomal protein L24 [Pectobacteriaceae]
group_1832	BY21311_00647	DPMP315_04401	helix-turn-helix domain-containing protein [Pectobacterium]
group_1833	BY21311_02635	DPMP315_01293	bifunctional 3-hydroxydecanoyl-ACP dehydratase/trans-2-decenoyl-ACP isomerase [Pectobacterium]
group_1834	BY21311_01313	DPMP315_00326	nuclear transport factor 2 family protein [Pectobacterium]
group_1835	BY21311_03156	DPMP315_03532	N-acetylmuramic acid 6-phosphate etherase [Pectobacterium]
group_1836	BY21311_01930	DPMP315_00947	MAPEG family protein [Pectobacterium]
group_1837	BY21311_02118	DPMP315_01733	YciY family protein [Pectobacterium]
group_1838	BY21311_04350	DPMP315_03026	YgiW/YdeI family stress tolerance OB fold protein [Pectobacterium]
group_1839	BY21311_03575	DPMP315_02734	YitT family protein [Pectobacterium]
group_184	BY21311_01413	DPMP315_00426	copper-binding protein [Pectobacterium]
group_1840	BY21311_04022	DPMP315_01463	hypothetical protein [Pectobacterium]
group_1841	BY21311_02116	DPMP315_01731	HI1450 family dsDNA-mimic protein [Pectobacterium]
group_1842	BY21311_03056	DPMP315_03436	HTH-type transcriptional regulator GalR [Pectobacterium]
group_1843	BY21311_04230	DPMP315_00731	helix-turn-helix domain-containing protein [Pectobacterium]
group_1844	BY21311_00323	DPMP315_03881	ribonuclease G [Pectobacterium]
group_1845	BY21311_02214	DPMP315_00875	SirB2 family protein [Pectobacterium]
group_1846	BY21311_03602	DPMP315_02756	kinase [Pectobacterium]
group_1847	BY21311_00801	DPMP315_02602	type II toxin-antitoxin system RatA family toxin [Pectobacterium]
group_1848	BY21311_02562	DPMP315_01223	TetR/AcrR family transcriptional regulator [Pectobacterium]
group_1849	BY21311_00986	DPMP315_00026	thioredoxin family protein [Pectobacterium]
group_185	BY21311_01440	DPMP315_00452	uridine kinase [Pectobacterium]
group_1850	BY21311_00520	DPMP315_01046	Imm10 family immunity protein [Pectobacterium]
group_1851	BY21311_00164	DPMP315_01128	hypothetical protein
group_1852	BY21311_00319	DPMP315_03877	rod shape-determining protein MreB [Pectobacterium]
group_1853	BY21311_02974	DPMP315_03377	D-amino-acid transaminase [Pectobacterium]
group_1854	BY21311_03235	DPMP315_02233	glutaredoxin-like protein NrdH [Pectobacterium]
group_1855	BY21311_03818	DPMP315_02970	alkyl hydroperoxide reductase subunit F [Pectobacterium]
group_1856	BY21311_02708	DPMP315_02279	methyl-accepting chemotaxis protein [Pectobacterium]
group_1857	BY21311_03511	DPMP315_00780	FKBP-type peptidyl-prolyl cis-trans isomerase [Pectobacterium]
group_1858	BY21311_02138	DPMP315_01753	protease SohB [Pectobacterium]
group_1859	BY21311_01253	DPMP315_00265	transcriptional regulator RcsB [Pectobacterium]
group_186	BY21311_01444	DPMP315_00456	hypothetical protein
group_1860	BY21311_01092	DPMP315_00104	type I methionyl aminopeptidase [Pectobacterium]
group_1861	BY21311_02036	DPMP315_01652	metal ABC transporter permease [Pectobacterium]
group_1862	BY21311_02615	DPMP315_01273	isochorismatase family protein [Pectobacterium]
group_1863	BY21311_01333	DPMP315_00346	glutamate/aspartate ABC transporter permease GltK [Pectobacterium]
group_1864	BY21311_03673	DPMP315_02827	DNA gyrase inhibitor YacG [Pectobacterium]
group_1865	BY21311_02748	DPMP315_03173	CDP-diacylglycerol--glycerol-3-phosphate 3-phosphatidyltransferase [Pectobacterium]
group_1866	BY21311_02630	DPMP315_01288	cell division inhibitor SulA [Pectobacterium]
group_1867	BY21311_03177	DPMP315_02175	RNA polymerase sigma factor RpoE [Pectobacterium]
group_1868	BY21311_02529	DPMP315_02571	FAD-binding oxidoreductase [Pectobacterium]
group_1869	BY21311_03953	DPMP315_02447	cAMP-activated global transcriptional regulator CRP [Enterobacterales]
group_187	BY21311_01447	DPMP315_00460	UDP-N-acetylglucosamine--undecaprenyl-phosphate N-acetylglucosaminephosphotransferase [Pectobacterium]
group_1870	BY21311_01515	DPMP315_04233	response regulator transcription factor [Pectobacterium]
group_1871	BY21311_01554	DPMP315_04271	sigma-70 family RNA polymerase sigma factor [Pectobacterium]
group_1872	BY21311_00387	DPMP315_03944	ketose-bisphosphate aldolase [Pectobacterium]
group_1873	BY21311_00591	DPMP315_04452	membrane protein FxsA [Pectobacterium]
group_1874	BY21311_04058	DPMP315_03221	GntP family permease [Pectobacterium]
group_1875	BY21311_02310	DPMP315_01866	HAD hydrolase-like protein [Pectobacterium]
group_1876	BY21311_01878	DPMP315_02354	lipid A ABC transporter ATP-binding protein/permease MsbA [Pectobacterium]
group_1877	BY21311_01189	DPMP315_00202	cytochrome o ubiquinol oxidase subunit III [Pectobacterium]
group_1878	BY21311_03642	DPMP315_02795	DeoR/GlpR family DNA-binding transcription regulator [Pectobacterium]
group_1879	BY21311_00412	DPMP315_03970	TRAP transporter substrate-binding protein [Pectobacterium]
group_188	BY21311_01448	DPMP315_00461	polysaccharide export protein [Pectobacterium]
group_1880	BY21311_01374	DPMP315_00387	biotin-dependent carboxyltransferase family protein [Pectobacterium]
group_1881	BY21311_02877	DPMP315_03280	NADH-quinone oxidoreductase subunit NuoI [Pectobacterium]
group_1882	BY21311_03342	DPMP315_01404	type VI secretion system contractile sheath large subunit [Pectobacterium]
group_1883	BY21311_01915	DPMP315_00934	lipoprotein [Pectobacterium]
group_1884	BY21311_02610	DPMP315_01269	hypothetical protein [Pectobacterium]
group_1885	BY21311_01719	DPMP315_03752	DNA starvation/stationary phase protection protein Dps [Pectobacterium]
group_1886	BY21311_03489	DPMP315_00800	inorganic triphosphatase [Pectobacterium]
group_1887	BY21311_02929	DPMP315_03332	molecular chaperone [Pectobacterium]
group_1888	BY21311_01211	DPMP315_00224	acyl-CoA thioesterase II [Pectobacterium]
group_1889	BY21311_00484	DPMP315_01010	LysR family transcriptional regulator [Pectobacterium]
group_189	BY21311_01449	DPMP315_00462	protein tyrosine phosphatase [Pectobacterium]
group_1890	BY21311_01422	DPMP315_00435	molybdenum ABC transporter ATP-binding protein ModC [Pectobacterium]
group_1891	BY21311_01876	DPMP315_02356	hypothetical protein
group_1892	BY21311_03230	DPMP315_02228	ABC transporter ATP-binding protein [Pectobacterium]
group_1893	BY21311_00607	DPMP315_04438	phage holin family protein [Pectobacterium]
group_1894	BY21311_01362	DPMP315_00375	EamA family transporter [Pectobacterium]
group_1895	BY21311_01535	DPMP315_04252	hypothetical protein
group_1896	BY21311_01674	DPMP315_03797	FMN-binding protein [Pectobacterium]
group_1897	BY21311_00694	DPMP315_04356	16S rRNA (guanine(1207)-N(2))-methyltransferase RsmC [Pectobacterium]
group_1898	BY21311_04056	DPMP315_03219	aspartate-semialdehyde dehydrogenase [Pectobacterium]
group_1899	BY21311_00733	DPMP315_04317	nuclear transport factor 2 family protein [Pectobacterium]
group_19	BY21311_03560 BY21311_03561	DPMP315_02720 DPMP315_04118	LysR family transcriptional regulator [Pectobacterium]
group_190	BY21311_01450	DPMP315_00463	tyrosine-protein kinase Wzc [Pectobacterium]
group_1900	BY21311_01089	DPMP315_00101	hypothetical protein
group_1901	BY21311_00525	DPMP315_01053	NADP-dependent oxidoreductase [Pectobacterium]
group_1902	BY21311_00404	DPMP315_03962	hypothetical protein
group_1903	BY21311_03409	DPMP315_03201	transcriptional repressor MprA [Pectobacterium]
group_1904	BY21311_04235	DPMP315_00726	AI-2E family transporter [Pectobacterium]
group_1905	BY21311_02533	DPMP315_01195	phosphoenolpyruvate synthase [Pectobacterium]
group_1906	BY21311_02242	DPMP315_01792	hypothetical protein
group_1907	BY21311_04355	DPMP315_03021	ATPase RavA stimulator ViaA [Pectobacterium]
group_1908	BY21311_00991	DPMP315_00031	aminotransferase class I/II-fold pyridoxal phosphate-dependent enzyme [Pectobacterium]
group_1909	BY21311_02476	DPMP315_02016	MarR family transcriptional regulator [Pectobacterium]
group_191	BY21311_01460	DPMP315_04177	dTDP-4-dehydrorhamnose reductase [Pectobacterium]
group_1910	BY21311_04314	DPMP315_00648	kdo(2)-lipid A phosphoethanolamine 7''-transferase [Pectobacterium]
group_1911	BY21311_03570	DPMP315_02729	replicative DNA helicase [Pectobacterium]
group_1912	BY21311_04169	DPMP315_04145	hypothetical protein
group_1913	BY21311_03077	DPMP315_03456	tRNA 5-hydroxyuridine modification protein YegQ [Pectobacterium]
group_1914	BY21311_01275	DPMP315_00288	uracil phosphoribosyltransferase [Pectobacterium]
group_1915	BY21311_03717	DPMP315_02870	acetolactate synthase small subunit [Pectobacterium]
group_1916	BY21311_02021	DPMP315_01637	metal-dependent hydrolase [Pectobacterium]
group_1917	BY21311_02696	DPMP315_02291	flagellar basal body rod protein FlgC [Pectobacteriaceae]
group_1918	BY21311_04364	DPMP315_03012	F0F1 ATP synthase subunit B [Pectobacterium]
group_1919	BY21311_02544	DPMP315_01206	NlpC/P60 family protein [Pectobacterium]
group_192	BY21311_01461	DPMP315_04178	dTDP-4-dehydrorhamnose 3,5-epimerase [Pectobacterium]
group_1920	BY21311_00677	DPMP315_04373	U32 family peptidase [Pectobacterium]
group_1921	BY21311_02963	DPMP315_03366	type II secretion system major pseudopilin GspG [Pectobacterium]
group_1922	BY21311_01193	DPMP315_00206	lipoprotein [Pectobacterium]
group_1923	BY21311_01806	DPMP315_03660	arginine ABC transporter permease ArtQ [Pectobacterium]
group_1924	BY21311_00173	DPMP315_01119	ATP-dependent protease subunit HslV [Pectobacterium]
group_1925	BY21311_02398	DPMP315_01954	peptide ABC transporter permease SapC [Pectobacterium]
group_1926	BY21311_03749	DPMP315_02902	molecular chaperone DnaK [Pectobacterium]
group_1927	BY21311_03945	DPMP315_02439	glutathione-regulated potassium-efflux system protein KefB [Pectobacterium]
group_1928	BY21311_00744	DPMP315_02636	Flp family type IVb pilin [Pectobacterium]
group_1929	BY21311_03298	DPMP315_01366	hypothetical protein
group_193	BY21311_01462	DPMP315_04179	glucose-1-phosphate thymidylyltransferase RfbA [Pectobacterium]
group_1930	BY21311_03479	DPMP315_00810	hypothetical protein
group_1931	BY21311_03241	DPMP315_02239	ribonuclease HI [Pectobacterium]
group_1932	BY21311_01407	DPMP315_00420	NAD(P)H-dependent oxidoreductase [Pectobacterium]
group_1933	BY21311_00474	DPMP315_00999	ribbon-helix-helix domain-containing protein [Pectobacteriaceae]
group_1934	BY21311_01886	DPMP315_02346	chromosome partition protein MukF [Pectobacterium]
group_1935	BY21311_04039	DPMP315_01480	thiosulfate sulfurtransferase GlpE [Pectobacterium]
group_1936	BY21311_01205	DPMP315_00218	hypothetical protein [Pectobacterium]
group_1937	BY21311_01079	DPMP315_00091	23S rRNA (cytidine(2498)-2'-O)-methyltransferase RlmM [Pectobacterium]
group_1938	BY21311_03500	DPMP315_00790	autotransporter assembly complex protein TamA [Pectobacterium]
group_1939	BY21311_03194	DPMP315_02193	DoxX family protein [Pectobacterium]
group_194	BY21311_01465	DPMP315_04182	hypothetical protein [Pectobacterium]
group_1940	BY21311_02095	DPMP315_01710	trimeric intracellular cation channel family protein [Pectobacterium]
group_1941	BY21311_02408	DPMP315_01964	FdhF/YdeP family oxidoreductase [Pectobacterium]
group_1942	BY21311_03107	DPMP315_03486	hypothetical protein [Pectobacterium]
group_1943	BY21311_03737	DPMP315_02890	carbamoyl-phosphate synthase large subunit [Pectobacterium]
group_1944	BY21311_01179	DPMP315_00192	1-deoxy-D-xylulose-5-phosphate synthase [Pectobacterium]
group_1945	BY21311_04265	DPMP315_00696	superoxide dismutase [Mn] [Pectobacterium]
group_1946	BY21311_04023	DPMP315_01464	alkaline phosphatase [Pectobacterium]
group_1947	BY21311_03792	DPMP315_02944	erythrose-4-phosphate dehydrogenase [Pectobacterium]
group_1948	BY21311_01093	DPMP315_00105	30S ribosomal protein S2 [Pectobacteriaceae]
group_1949	BY21311_03928	DPMP315_02422	elongation factor G [Pectobacterium]
group_195	BY21311_01468	DPMP315_04185	YjbH domain-containing protein [Pectobacterium]
group_1950	BY21311_01756	DPMP315_03705	PTS fructose transporter subunit IIBC [Pectobacterium]
group_1951	BY21311_03900	DPMP315_02394	30S ribosomal protein S11 [Bacteria]
group_1952	BY21311_03683	DPMP315_02837	UDP-N-acetylmuramate--L-alanine ligase [Pectobacterium]
group_1953	BY21311_00073	DPMP315_03149	valine--pyruvate transaminase [Pectobacterium]
group_1954	BY21311_01820	DPMP315_03647	phenazine biosynthesis protein [Pectobacterium]
group_1955	BY21311_01332	DPMP315_00345	amino acid ABC transporter ATP-binding protein [Pectobacterium]
group_1956	BY21311_02121	DPMP315_01736	TonB system transport protein TonB [Pectobacterium]
group_1957	BY21311_03493	DPMP315_00796	bifunctional dihydroneopterin aldolase/7,8-dihydroneopterin epimerase [Pectobacterium]
group_1958	BY21311_01240	DPMP315_00252	TraB/GumN family protein [Pectobacterium]
group_1959	BY21311_04019	DPMP315_01460	SUMF1/EgtB/PvdO family nonheme iron enzyme [Pectobacterium]
group_196	BY21311_01478	DPMP315_04195	3D-(3,5/4)-trihydroxycyclohexane-1,2-dione acylhydrolase (decyclizing) [Pectobacterium]
group_1960	BY21311_03545	DPMP315_02705	GNAT family N-acetyltransferase [Pectobacterium]
group_1961	BY21311_03919	DPMP315_02413	50S ribosomal protein L2 [Pectobacterium]
group_1962	BY21311_02568	DPMP315_01229	thiamine kinase [Pectobacterium]
group_1963	BY21311_03754	DPMP315_02907	transaldolase [Pectobacterium]
group_1964	BY21311_04224	DPMP315_00733	LysR family transcriptional regulator [Pectobacterium]
group_1965	BY21311_03620	DPMP315_02774	HAD-IB family hydrolase [Pectobacterium]
group_1966	BY21311_02012	DPMP315_01628	phenylalanine--tRNA ligase subunit alpha [Pectobacterium]
group_1967	BY21311_01695	DPMP315_03776	putative holin [Pectobacterium]
group_1968	BY21311_02184	DPMP315_00905	VF530 family protein [Pectobacterium]
group_1969	BY21311_01196	DPMP315_00209	ATP-dependent Clp endopeptidase proteolytic subunit ClpP [Pectobacterium]
group_197	BY21311_01487	DPMP315_04204	5-deoxy-glucuronate isomerase [Pectobacterium]
group_1970	BY21311_02885	DPMP315_03288	transcriptional regulator LrhA [Pectobacterium]
group_1971	BY21311_00611	DPMP315_04434	DedA family protein [Pectobacterium]
group_1972	BY21311_02966	DPMP315_03369	type II secretion system secretin GspD [Pectobacterium]
group_1973	BY21311_00078	DPMP315_03144	GntR family transcriptional regulator [Pectobacterium]
group_1974	BY21311_03923	DPMP315_02417	30S ribosomal protein S10 [Bacteria]
group_1975	BY21311_01041	DPMP315_00056	DNA mismatch repair endonuclease MutH [Pectobacterium]
group_1976	BY21311_01098	DPMP315_00109	1-deoxy-D-xylulose-5-phosphate reductoisomerase [Pectobacterium]
group_1977	BY21311_02206	DPMP315_00883	methylated-DNA--[protein]-cysteine S-methyltransferase [Pectobacterium]
group_1978	BY21311_03688	DPMP315_02842	UDP-N-acetylmuramoyl-tripeptide--D-alanyl-D-alanine ligase [Pectobacterium]
group_1979	BY21311_01405	DPMP315_00418	3-deoxy-7-phosphoheptulonate synthase AroG [Pectobacterium]
group_198	BY21311_01490	DPMP315_04208	ABC transporter ATP-binding protein [Pectobacterium]
group_1980	BY21311_01967	DPMP315_01583	malate/lactate/ureidoglycolate dehydrogenase [Pectobacterium]
group_1981	BY21311_01294	DPMP315_00307	sigma-70 family RNA polymerase sigma factor [Pectobacterium]
group_1982	BY21311_01321	DPMP315_00334	D-alanyl-D-alanine carboxypeptidase DacA [Pectobacterium]
group_1983	BY21311_03771	DPMP315_02924	phosphoglycerate dehydrogenase [Pectobacterium]
group_1984	BY21311_02693	DPMP315_02294	flagellar basal body rod protein FlgF [Pectobacterium]
group_1985	BY21311_02104	DPMP315_01719	patatin-like phospholipase RssA [Pectobacterium]
group_1986	BY21311_03005	DPMP315_03384	acyl carrier protein [Pectobacterium]
group_1987	BY21311_03386	DPMP315_02145	amino acid ABC transporter permease [Pectobacterium]
group_1988	BY21311_01207	DPMP315_00220	SmdA family multidrug ABC transporter permease/ATP-binding protein [Pectobacterium]
group_1989	BY21311_04080	DPMP315_04055	sugar/pyridoxal phosphate phosphatase YigL [Pectobacterium]
group_199	BY21311_01491	DPMP315_04209	iron ABC transporter permease [Pectobacterium]
group_1990	BY21311_03061	DPMP315_03441	sugar ABC transporter permease [Pectobacterium]
group_1991	BY21311_04325	DPMP315_00638	fatty acid biosynthesis protein FabY [Pectobacterium]
group_1992	BY21311_03496	DPMP315_00793	inorganic diphosphatase [Pectobacterium]
group_1993	BY21311_02004	DPMP315_01620	PD40 domain-containing protein [Pectobacterium]
group_1994	BY21311_04267	DPMP315_00694	YibL family ribosome-associated protein [Pectobacterium]
group_1995	BY21311_00766	DPMP315_02659	transcriptional regulator [Pectobacterium]
group_1996	BY21311_01096	DPMP315_00108	ribosome recycling factor [Pectobacterium]
group_1997	BY21311_02220	DPMP315_00869	ribose-phosphate diphosphokinase [Pectobacterium]
group_1998	BY21311_00262	DPMP315_03047	DNA-directed RNA polymerase subunit beta [Pectobacterium]
group_1999	BY21311_02968	DPMP315_03371	glycoside hydrolase family 28 protein [Pectobacterium]
group_2	BY21311_00459 BY21311_02744 BY21311_00584 BY21311_00920 BY21311_00460 BY21311_02758 BY21311_00576 BY21311_01606 BY21311_02977	DPMP315_03825 DPMP315_03183 DPMP315_04020 DPMP315_04459 DPMP315_04312 DPMP315_02500	integrase arm-type DNA-binding domain-containing protein [Pectobacterium]
group_20	BY21311_03959 BY21311_03961	DPMP315_02453 DPMP315_02454	polysaccharide lyase [Pectobacterium]
group_200	BY21311_01501	DPMP315_04219	alpha/beta hydrolase [Pectobacterium]
group_2000	BY21311_01141	DPMP315_00155	TolC family outer membrane protein [Pectobacterium]
group_2001	BY21311_01198	DPMP315_00211	endopeptidase La [Pectobacterium]
group_2002	BY21311_03320	DPMP315_01383	hypothetical protein
group_2003	BY21311_03293	DPMP315_01361	hypothetical protein [Pectobacterium]
group_2004	BY21311_02112	DPMP315_01727	oligopeptide ABC transporter permease OppB [Pectobacterium]
group_2005	BY21311_01770	DPMP315_03691	LysR family transcriptional regulator [Pectobacterium]
group_2006	BY21311_02679	DPMP315_02308	flagellar basal body-associated protein FliL [Pectobacterium]
group_2007	BY21311_00790	DPMP315_02608	hypothetical protein
group_2008	BY21311_04128	DPMP315_04103	dTDP-4-amino-4,6-dideoxygalactose transaminase [Pectobacterium]
group_2009	BY21311_03606	DPMP315_02760	TerD family protein [Pectobacterium]
group_201	BY21311_01509	DPMP315_04227	LacI family DNA-binding transcriptional regulator [Pectobacterium]
group_2010	BY21311_03523	DPMP315_00768	hypothetical protein
group_2011	BY21311_03804	DPMP315_02956	class 1 fructose-bisphosphatase [Pectobacterium]
group_2012	BY21311_02755	DPMP315_03180	anti-adapter protein IraP [Pectobacterium]
group_2013	BY21311_02288	DPMP315_01842	EAL domain-containing protein [Pectobacterium]
group_2014	BY21311_02714	DPMP315_02273	flagellar transcriptional regulator FlhD [Pectobacterium]
group_2015	BY21311_02566	DPMP315_01227	alpha/beta hydrolase YcfP [Pectobacterium]
group_2016	BY21311_01924	DPMP315_00943	copper homeostasis protein CutC [Pectobacterium]
group_2017	BY21311_04346	DPMP315_03030	ribose ABC transporter substrate-binding protein RbsB [Pectobacteriaceae]
group_2018	BY21311_03897	DPMP315_02391	50S ribosomal protein L17 [Pectobacteriaceae]
group_2019	BY21311_03547	DPMP315_02707	PTS sugar transporter subunit IIB [Pectobacterium]
group_202	BY21311_01513	DPMP315_04231	MFS transporter family glucose-6-phosphate receptor UhpC [Pectobacterium]
group_2020	BY21311_03031	DPMP315_03410	peptidylprolyl isomerase B [Pectobacterium]
group_2021	BY21311_03851	DPMP315_02666	small ribosomal subunit biogenesis GTPase RsgA [Pectobacterium]
group_2022	BY21311_01937	DPMP315_00954	crossover junction endodeoxyribonuclease RuvC [Pectobacterium]
group_2023	BY21311_03175	DPMP315_02173	sigma-E factor regulatory protein RseB [Pectobacterium]
group_2024	BY21311_00652	DPMP315_04396	50S ribosomal protein L27 [Bacteria]
group_2025	BY21311_01992	DPMP315_01608	NADP-dependent isocitrate dehydrogenase [Pectobacterium]
group_2026	BY21311_02278	DPMP315_01832	type III secretion protein [Pectobacterium]
group_2027	BY21311_02499	DPMP315_02541	cytochrome c maturation protein CcmE [Pectobacterium]
group_2028	BY21311_00640	DPMP315_04408	G/U mismatch-specific DNA glycosylase [Pectobacterium]
group_2029	BY21311_04249	DPMP315_00712	rhodanese-like domain-containing protein [Pectobacterium]
group_203	BY21311_01550	DPMP315_04267	type I secretion system permease/ATPase [Pectobacterium]
group_2030	BY21311_02609	DPMP315_01268	hypothetical protein [Pectobacterium]
group_2031	BY21311_01728	DPMP315_03744	cold shock domain-containing protein [Pectobacterium]
group_2032	BY21311_02918	DPMP315_03321	YfcL family protein [Pectobacterium]
group_2033	BY21311_00188	DPMP315_01104	ABC transporter permease subunit [Pectobacterium]
group_2034	BY21311_00086	DPMP315_03137	hypothetical protein
group_2035	BY21311_01899	DPMP315_02333	cell division protein ZapC [Pectobacterium]
group_2036	BY21311_02051	DPMP315_01667	RidA family protein [Pectobacterium]
group_2037	BY21311_03111	DPMP315_03490	outer membrane protein assembly factor BamB [Pectobacterium]
group_2038	BY21311_04217	DPMP315_00740	ABC transporter ATP-binding protein [Pectobacterium]
group_2039	BY21311_02875	DPMP315_03278	NADH-quinone oxidoreductase subunit NuoK [Pectobacterium]
group_204	BY21311_01560	DPMP315_04278	class I SAM-dependent methyltransferase [Pectobacterium]
group_2040	BY21311_01917	DPMP315_00936	multidrug efflux MFS transporter MdtH [Pectobacterium]
group_2041	BY21311_03430	DPMP315_00860	RNA polymerase sigma factor RpoS [Pectobacterium]
group_2042	BY21311_02536	DPMP315_01198	hemin-degrading factor [Pectobacterium]
group_2043	BY21311_03011	DPMP315_03390	hypothetical protein [Pectobacterium]
group_2044	BY21311_02151	DPMP315_01766	L-arabinose isomerase [Pectobacterium]
group_2045	BY21311_01850	DPMP315_03618	bifunctional histidinol-phosphatase/imidazoleglycerol-phosphate dehydratase HisB [Pectobacterium]
group_2046	BY21311_00605	DPMP315_04440	DoxX family protein [Pectobacterium]
group_2047	BY21311_03958	DPMP315_02452	hypothetical protein [Pectobacterium]
group_2048	BY21311_00718	DPMP315_04332	HD domain-containing protein [Pectobacterium]
group_2049	BY21311_04070	DPMP315_04046	PTS sugar transporter subunit IIB [Pectobacterium]
group_205	BY21311_01561	DPMP315_04279	AraC family transcriptional regulator [Pectobacterium]
group_2050	BY21311_03862	DPMP315_02677	elongation factor P [Pectobacterium]
group_2051	BY21311_00352	DPMP315_03910	serine endoprotease DegQ [Pectobacterium]
group_2052	BY21311_02062	DPMP315_01678	YcgN family cysteine cluster protein [Pectobacterium]
group_2053	BY21311_00020	DPMP315_01528	dihydrodipicolinate synthase family protein [Pectobacterium]
group_2054	BY21311_01873	DPMP315_02359	iron chelate uptake ABC transporter family permease subunit [Pectobacterium]
group_2055	BY21311_01949	DPMP315_00966	pyruvate kinase [Pectobacterium]
group_2056	BY21311_00008	DPMP315_01543	MFS transporter [Pectobacterium]
group_2057	BY21311_02938	DPMP315_03341	phospholipid-binding lipoprotein MlaA [Pectobacterium]
group_2058	BY21311_00232	DPMP315_03073	porphobilinogen synthase [Pectobacterium]
group_2059	BY21311_00893	DPMP315_00527	transporter substrate-binding domain-containing protein [Pectobacterium]
group_206	BY21311_01562	DPMP315_04280	hypothetical protein [Pectobacterium]
group_2060	BY21311_00543	DPMP315_01071	molecular chaperone OsmY [Pectobacterium]
group_2061	BY21311_04292	DPMP315_00670	type II toxin-antitoxin system Phd/YefM family antitoxin [Pectobacterium]
group_2062	BY21311_01110	DPMP315_00121	acetyl-CoA carboxylase carboxyl transferase subunit alpha [Pectobacterium]
group_2063	BY21311_00736	DPMP315_04314	LysE family transporter [Pectobacterium]
group_2064	BY21311_00685	DPMP315_04365	purine-nucleoside phosphorylase [Pectobacterium]
group_2065	BY21311_02518	DPMP315_02560	pyruvate kinase PykF [Pectobacterium]
group_2066	BY21311_03969	DPMP315_01411	ABC transporter permease [Pectobacterium]
group_2067	BY21311_03765	DPMP315_02918	trp operon repressor [Pectobacterium]
group_2068	BY21311_00340	DPMP315_03898	LPS export ABC transporter periplasmic protein LptC [Pectobacterium]
group_2069	BY21311_02450	DPMP315_02005	hypothetical protein
group_207	BY21311_01634	DPMP315_02473	malonyl-ACP O-methyltransferase BioC [Pectobacterium]
group_2070	BY21311_03209	DPMP315_02208	LysE family translocator [Pectobacterium]
group_2071	BY21311_02174	DPMP315_00915	bifunctional NADP-dependent 3-hydroxy acid dehydrogenase/3-hydroxypropionate dehydrogenase YdfG [Pectobacterium]
group_2072	BY21311_02050	DPMP315_01666	YoaH family protein [Pectobacterium]
group_2073	BY21311_00360	DPMP315_03918	glutamate synthase small subunit [Pectobacterium]
group_2074	BY21311_03475	DPMP315_00814	2-hydroxy-3-oxopropionate reductase [Pectobacterium]
group_2075	BY21311_04318	DPMP315_00644	DNA-directed RNA polymerase subunit omega [Pectobacteriaceae]
group_2076	BY21311_03745	DPMP315_02898	30S ribosomal protein S20 [Pectobacterium]
group_2077	BY21311_04171	DPMP315_04147	molecular chaperone HscC [Pectobacterium]
group_2078	BY21311_01556	DPMP315_04273	aminobutyraldehyde dehydrogenase [Pectobacterium]
group_2079	BY21311_01209	DPMP315_00222	P-II family nitrogen regulator [Enterobacterales]
dsbC	BY21311_01648	DPMP315_02459	hypothetical protein
group_2080	BY21311_01701	DPMP315_03770	hypothetical protein [Pectobacterium]
group_2081	BY21311_04154	DPMP315_04130	ABC transporter substrate-binding protein [Pectobacterium]
group_2082	BY21311_04115	DPMP315_04090	amino acid ABC transporter substrate-binding protein [Pectobacterium]
group_2083	BY21311_00641	DPMP315_04407	RNA polymerase sigma factor RpoD [Pectobacterium]
group_2084	BY21311_03917	DPMP315_02411	50S ribosomal protein L22 [Pectobacteriaceae]
group_2085	BY21311_01376	DPMP315_00389	pyroglutamyl-peptidase I [Pectobacterium]
group_2086	BY21311_03222	DPMP315_02220	3-methyl-2-oxobutanoate hydroxymethyltransferase [Pectobacterium]
group_2087	BY21311_01781	DPMP315_03680	methionine ABC transporter ATP-binding protein [Pectobacterium]
group_2088	BY21311_03030	DPMP315_03409	DoxX family protein [Pectobacterium]
group_2089	BY21311_02173	DPMP315_00916	hypothetical protein
group_209	BY21311_01675	DPMP315_03796	hypothetical protein [Pectobacterium]
group_2090	BY21311_00341	DPMP315_03899	3-deoxy-manno-octulosonate-8-phosphatase KdsC [Pectobacterium]
group_2091	BY21311_02451	DPMP315_02006	HTH-type transcriptional repressor PurR [Pectobacterium]
group_2092	BY21311_00398	DPMP315_03956	1-acylglycerol-3-phosphate O-acyltransferase [Pectobacterium]
group_2093	BY21311_02677	DPMP315_02310	flagella biosynthesis chaperone FliJ [Pectobacterium]
group_2094	BY21311_01956	DPMP315_00972	hypothetical protein
group_2095	BY21311_03130	DPMP315_03508	Fe-S cluster assembly transcriptional regulator IscR [Pectobacterium]
group_2096	BY21311_03700	DPMP315_02854	2-isopropylmalate synthase [Pectobacterium]
group_2097	BY21311_01378	DPMP315_00391	citrate synthase [Pectobacterium]
group_2098	BY21311_03549	DPMP315_02709	PTS transporter subunit EIIC [Pectobacterium]
group_2099	BY21311_03899	DPMP315_02393	30S ribosomal protein S4 [Pectobacterium]
group_21	BY21311_00108 BY21311_00109	DPMP315_01180	insulinase family protein [Pectobacterium]
group_210	BY21311_01679	DPMP315_03792	ABC transporter permease subunit [Pectobacterium]
group_2100	BY21311_00696	DPMP315_04354	LysR family transcriptional regulator [Pectobacterium]
group_2101	BY21311_04054	DPMP315_03217	sensor histidine kinase [Pectobacterium]
group_2102	BY21311_00544	DPMP315_01072	hypothetical protein
group_2103	BY21311_02957	DPMP315_03360	type II secretion system protein M [Pectobacterium]
group_2104	BY21311_04269	DPMP315_00692	mannitol-1-phosphate 5-dehydrogenase [Pectobacterium]
group_2105	BY21311_01175	DPMP315_00188	bifunctional diaminohydroxyphosphoribosylaminopyrimidine deaminase/5-amino-6-(5-phosphoribosylamino)uracil reductase RibD [Pectobacterium]
group_2106	BY21311_00406	DPMP315_03964	DedA family protein [Pectobacterium]
group_2107	BY21311_04135	DPMP315_04110	transcription termination factor Rho [Pectobacterium]
group_2108	BY21311_01031	DPMP315_00046	membrane-bound lytic murein transglycosylase MltC [Pectobacterium]
group_2109	BY21311_02622	DPMP315_01280	heat shock protein HspQ [Pectobacterium]
group_211	BY21311_01700	DPMP315_03771	Gp37 family protein [Pectobacterium]
group_2110	BY21311_01558	DPMP315_04275	hypothetical protein
group_2111	BY21311_02150	DPMP315_01765	transcription modulator YdgT [Pectobacterium]
group_2112	BY21311_04316	DPMP315_00646	hypothetical protein
group_2113	BY21311_03517	DPMP315_00774	primosomal replication protein N [Pectobacterium]
group_2114	BY21311_03431	DPMP315_00859	murein hydrolase activator NlpD [Pectobacterium]
group_2115	BY21311_01185	DPMP315_00198	YajQ family cyclic di-GMP-binding protein [Pectobacterium]
group_2116	BY21311_02103	DPMP315_01718	YchJ family protein [Pectobacterium]
group_2117	BY21311_03567	DPMP315_02726	tRNA dihydrouridine(20/20a) synthase DusA [Pectobacterium]
group_2118	BY21311_01308	DPMP315_00321	LysR family transcriptional regulator [Pectobacterium]
group_2119	BY21311_01320	DPMP315_00333	hypothetical protein
group_212	BY21311_01705	DPMP315_03766	phage tail tape measure protein [Pectobacterium]
group_2120	BY21311_04219	DPMP315_00738	ABC transporter permease subunit [Pectobacterium]
group_2121	BY21311_01547	DPMP315_04264	anaerobic C4-dicarboxylate transporter [Pectobacterium]
group_2122	BY21311_01040	DPMP315_00055	hypothetical protein
group_2123	BY21311_01804	DPMP315_03662	arginine ABC transporter substrate-binding protein [Pectobacterium]
group_2124	BY21311_01523	DPMP315_04241	methyl-accepting chemotaxis protein [Pectobacterium]
group_2125	BY21311_02183	DPMP315_00906	glycoside hydrolase family 10 protein [Pectobacterium]
group_2126	BY21311_02948	DPMP315_03351	alpha/beta hydrolase [Pectobacterium]
group_2127	BY21311_01939	DPMP315_00956	Holliday junction branch migration DNA helicase RuvB [Pectobacterium]
group_2128	BY21311_04001	DPMP315_01442	two-component system response regulator OmpR [Pectobacteriaceae]
group_2129	BY21311_01105	DPMP315_00116	3-hydroxyacyl-ACP dehydratase FabZ [Pectobacterium]
group_213	BY21311_01709	DPMP315_03762	phage baseplate assembly protein V [Pectobacterium]
group_2131	BY21311_03621	DPMP315_02775	DeoR/GlpR family DNA-binding transcription regulator [Pectobacterium]
group_2132	BY21311_02404	DPMP315_01960	hypothetical protein [Pectobacterium]
group_2133	BY21311_00250	DPMP315_03035	type I pantothenate kinase [Pectobacterium]
group_2134	BY21311_00913	DPMP315_00546	copper-binding periplasmic metallochaperone CueP [Pectobacterium]
group_2135	BY21311_03753	DPMP315_02906	GGDEF domain-containing protein [Pectobacterium]
group_2136	BY21311_02860	DPMP315_03263	NAD(P)H-binding protein [Pectobacterium]
group_2137	BY21311_02525	DPMP315_02567	Fe-S cluster assembly protein SufB [Pectobacterium]
group_2138	BY21311_00330	DPMP315_03888	ribosome-associated protein [Pectobacterium]
group_2139	BY21311_01812	DPMP315_03654	NADH oxidoreductase [Pectobacterium]
group_214	BY21311_01730	DPMP315_03742	YmjA family protein [Pectobacterium]
group_2140	BY21311_01688	DPMP315_03783	ATP-dependent DNA helicase DinG [Pectobacterium]
group_2141	BY21311_03461	DPMP315_00829	MFS transporter [Pectobacterium]
group_2142	BY21311_01923	DPMP315_00942	VOC family protein [Pectobacterium]
group_2143	BY21311_03803	DPMP315_02955	Holliday junction resolvase RuvX [Pectobacterium]
group_2144	BY21311_02713	DPMP315_02274	flagellar transcriptional regulator FlhC [Pectobacterium]
group_2145	BY21311_03196	DPMP315_02195	sulfate ABC transporter permease subunit CysW [Pectobacterium]
group_2146	BY21311_01441	DPMP315_00453	dCTP deaminase [Pectobacterium]
group_2147	BY21311_01279	DPMP315_00292	M48 family metallopeptidase [Pectobacterium]
group_2148	BY21311_01386	DPMP315_00399	succinate--CoA ligase subunit alpha [Pectobacterium]
group_2149	BY21311_01771	DPMP315_03690	methyl-accepting chemotaxis protein [Pectobacterium]
group_215	BY21311_01752	DPMP315_03709	hypothetical protein
group_2150	BY21311_00299	DPMP315_03857	tRNA dihydrouridine synthase DusB [Pectobacterium]
group_2151	BY21311_02946	DPMP315_03349	hypothetical protein [Pectobacterium]
group_2152	BY21311_03294	DPMP315_01362	hypothetical protein [Pectobacterium]
group_2153	BY21311_03967	DPMP315_01409	ABC transporter ATP-binding protein [Pectobacterium]
group_2154	BY21311_02307	DPMP315_01863	o-succinylbenzoate synthase [Pectobacterium]
group_2155	BY21311_02729	DPMP315_02256	hypothetical protein [Pectobacterium]
group_2156	BY21311_03485	DPMP315_00804	hypothetical protein
group_2157	BY21311_02412	DPMP315_01968	L-ribulose-5-phosphate 4-epimerase [Pectobacterium]
group_2158	BY21311_01754	DPMP315_03707	fused PTS fructose transporter subunit IIA/HPr protein [Pectobacterium]
group_2159	BY21311_01919	DPMP315_00938	YceH family protein [Pectobacterium]
group_216	BY21311_01833	DPMP315_03635	LysR family transcriptional regulator [Pectobacterium]
group_2160	BY21311_01306	DPMP315_00319	hypothetical protein
group_2161	BY21311_03287	DPMP315_01352	isocyanide synthase family protein [Pectobacterium]
group_2162	BY21311_02898	DPMP315_03301	dihydroneopterin triphosphate 2'-epimerase [Pectobacterium]
group_2163	BY21311_02548	DPMP315_01210	class I SAM-dependent methyltransferase [Pectobacterium]
group_2164	BY21311_02591	DPMP315_01251	hypothetical protein
group_2165	BY21311_04368	DPMP315_03008	F0F1 ATP synthase subunit beta [Pectobacterium]
group_2166	BY21311_03808	DPMP315_02960	protease modulator HflC [Pectobacterium]
group_2167	BY21311_01187	DPMP315_00200	heme o synthase [Pectobacterium]
group_2168	BY21311_03501	DPMP315_00789	peptide-methionine (S)-S-oxide reductase MsrA [Pectobacterium]
group_2169	BY21311_03565	DPMP315_02724	hypothetical protein [Pectobacterium]
group_217	BY21311_01834	DPMP315_03634	cytosine permease [Pectobacterium]
group_2170	BY21311_01683	DPMP315_03788	beta-glucosidase BglX [Pectobacterium]
group_2171	BY21311_03756	DPMP315_02909	threonine synthase [Pectobacterium]
group_2172	BY21311_03252	DPMP315_01317	ribosome-associated translation inhibitor RaiA [Pectobacterium]
group_2173	BY21311_02186	DPMP315_00902	nuclear transport factor 2 family protein [Pectobacterium]
group_2174	BY21311_00727	DPMP315_04323	site-specific tyrosine recombinase XerD [Pectobacterium]
group_2175	BY21311_04124	DPMP315_04099	lipopolysaccharide N-acetylmannosaminouronosyltransferase [Pectobacterium]
group_2176	BY21311_02088	DPMP315_01703	bifunctional nicotinamidase/pyrazinamidase [Pectobacterium]
group_2177	BY21311_02340	DPMP315_01896	two-component system response regulator NarL [Pectobacteriaceae]
group_2178	BY21311_02204	DPMP315_00884	Gfo/Idh/MocA family oxidoreductase [Pectobacterium]
group_2179	BY21311_01737	DPMP315_03723	50S ribosomal protein L25 [Pectobacterium]
group_218	BY21311_01835	DPMP315_03633	hypothetical protein
group_2180	BY21311_01194	DPMP315_00207	transcriptional regulator BolA [Pectobacterium]
group_2181	BY21311_01980	DPMP315_01596	spermidine/putrescine ABC transporter permease PotC [Pectobacterium]
group_2182	BY21311_02893	DPMP315_03296	phosphate acetyltransferase [Pectobacterium]
group_2183	BY21311_00772	DPMP315_02626	MFS transporter [Pectobacterium]
group_2184	BY21311_04363	DPMP315_03013	F0F1 ATP synthase subunit C [Enterobacterales]
group_2185	BY21311_02106	DPMP315_01721	UTP--glucose-1-phosphate uridylyltransferase GalU [Pectobacterium]
group_2186	BY21311_00442	DPMP315_04004	YhcH/YjgK/YiaL family protein [Pectobacterium]
group_2187	BY21311_02352	DPMP315_01908	two-component system response regulator RstA [Pectobacterium]
group_2188	BY21311_02527	DPMP315_02569	hypothetical protein [Pectobacterium]
group_2189	BY21311_03407	DPMP315_03203	AzlC family ABC transporter permease [Pectobacterium]
group_219	BY21311_01893	DPMP315_02339	porin [Pectobacterium]
group_2190	BY21311_02385	DPMP315_01941	PTS sugar transporter subunit IIB [Pectobacterium]
group_2191	BY21311_02006	DPMP315_01622	YebO family protein [Pectobacterium]
group_2192	BY21311_02120	DPMP315_01735	YciI family protein [Pectobacterium]
group_2193	BY21311_03494	DPMP315_00795	glycerol-3-phosphate 1-O-acyltransferase PlsY [Pectobacterium]
group_2194	BY21311_01945	DPMP315_00962	zinc ABC transporter ATP-binding protein ZnuC [Pectobacterium]
group_2195	BY21311_02108	DPMP315_01723	thymidine kinase [Pectobacterium]
group_2196	BY21311_03261	DPMP315_01326	ribosome maturation factor RimM [Pectobacterium]
group_2197	BY21311_03079	DPMP315_03458	phosphate-starvation-inducible protein PsiE [Pectobacterium]
group_2198	BY21311_00516	DPMP315_01042	ABC transporter substrate-binding protein [Pectobacterium]
group_2199	BY21311_01528	DPMP315_04245	ABC transporter permease [Pectobacterium]
group_22	BY21311_00226 BY21311_00227	DPMP315_03078	ubiquinone biosynthesis regulatory protein kinase UbiB [Pectobacterium]
group_220	BY21311_01902	DPMP315_02330	ABC transporter ATP-binding protein [Pectobacterium]
group_2200	BY21311_03205	DPMP315_02204	iron-sulfur cluster insertion protein ErpA [Pectobacterium]
group_2201	BY21311_01821	DPMP315_03646	translation initiation factor IF-1 [Enterobacterales]
group_2202	BY21311_03769	DPMP315_02922	LysR family transcriptional regulator [Pectobacterium]
group_2203	BY21311_03901	DPMP315_02395	30S ribosomal protein S13 [Pectobacterium]
group_2204	BY21311_03886	DPMP315_02380	shikimate dehydrogenase [Pectobacterium]
group_2205	BY21311_00764	DPMP315_02656	hypothetical protein
group_2206	BY21311_02361	DPMP315_01917	type 1 fimbrial protein [Pectobacterium]
group_2207	BY21311_00051	DPMP315_01497	dipeptide ABC transporter ATP-binding protein [Pectobacterium]
group_2208	BY21311_02927	DPMP315_03330	spore coat U domain-containing protein [Pectobacterium]
group_2209	BY21311_01383	DPMP315_00396	2-oxoglutarate dehydrogenase E1 component [Pectobacterium]
group_221	BY21311_01938	DPMP315_00955	Holliday junction branch migration protein RuvA [Pectobacterium]
group_2210	BY21311_03487	DPMP315_00802	bifunctional D-glycero-beta-D-manno-heptose-7-phosphate kinase/D-glycero-beta-D-manno-heptose 1-phosphate adenylyltransferase HldE [Pectobacterium]
group_2211	BY21311_01717	DPMP315_03754	glutamine ABC transporter permease GlnP [Pectobacterium]
group_2212	BY21311_03697	DPMP315_02851	acetolactate synthase small subunit [Pectobacterium]
group_2213	BY21311_03806	DPMP315_02958	adenylosuccinate synthase [Pectobacterium]
group_2214	BY21311_03981	DPMP315_01423	phosphoglycolate phosphatase [Pectobacterium]
group_2215	BY21311_03604	DPMP315_02758	VWA domain-containing protein [Pectobacterium]
group_2216	BY21311_03193	DPMP315_02192	TetR/AcrR family transcriptional regulator [Pectobacterium]
group_2217	BY21311_02212	DPMP315_00877	3-deoxy-8-phosphooctulonate synthase [Pectobacterium]
group_2218	BY21311_01409	DPMP315_00422	2,3-diphosphoglycerate-dependent phosphoglycerate mutase [Pectobacterium]
group_2219	BY21311_02555	DPMP315_01217	lipoprotein-releasing ABC transporter ATP-binding protein LolD [Pectobacterium]
group_222	BY21311_01961	DPMP315_03567	hypothetical protein [Pectobacterium]
group_2220	BY21311_00852	DPMP315_00489	phosphoenolpyruvate-protein phosphotransferase PtsI [Pectobacterium]
group_2221	BY21311_03477	DPMP315_00812	glucarate dehydratase [Pectobacterium]
group_2222	BY21311_02902	DPMP315_03305	histidine ABC transporter permease HisQ [Pectobacterium]
group_2223	BY21311_02178	DPMP315_00911	tautomerase PptA [Pectobacterium]
group_2224	BY21311_00208	DPMP315_03096	hypothetical protein
group_2225	BY21311_03651	DPMP315_02805	metalloregulator ArsR/SmtB family transcription factor [Pectobacterium]
group_2226	BY21311_03275	DPMP315_01340	recombination regulator RecX [Pectobacterium]
group_2227	BY21311_01077	DPMP315_00089	transcriptional regulator GcvA [Pectobacterium]
group_2228	BY21311_00004	DPMP315_01547	DNA topoisomerase (ATP-hydrolyzing) subunit B [Pectobacterium]
group_2229	BY21311_02934	DPMP315_03337	YfcZ/YiiS family protein [Pectobacterium]
group_223	BY21311_01977	DPMP315_01593	helix-turn-helix transcriptional regulator [Pectobacterium]
group_2230	BY21311_02311	DPMP315_01867	phosphatase PAP2 family protein [Pectobacterium]
group_2231	BY21311_01767	DPMP315_03694	glutathione S-transferase [Pectobacterium]
group_2232	BY21311_03971	DPMP315_01413	mandelate racemase family protein [Pectobacterium]
group_2233	BY21311_04037	DPMP315_01478	YhcH/YjgK/YiaL family protein [Pectobacterium]
group_2234	BY21311_04117	DPMP315_04092	adenylosuccinate lyase [Pectobacterium]
group_2235	BY21311_03915	DPMP315_02409	50S ribosomal protein L16 [Pectobacteriaceae]
group_2236	BY21311_02631	DPMP315_01289	porin OmpA [Pectobacterium]
group_2237	BY21311_03674	DPMP315_02828	8-oxo-dGTP diphosphatase MutT [Pectobacterium]
group_2238	BY21311_03535	DPMP315_00757	hypothetical protein
group_2239	BY21311_03362	DPMP315_02121	sigma factor-binding protein Crl [Pectobacterium]
group_224	BY21311_02016	DPMP315_01632	ABC transporter ATP-binding protein/permease [Pectobacterium]
group_2240	BY21311_00990	DPMP315_00030	hypothetical protein
group_2241	BY21311_01122	DPMP315_00137	Fe(3+) dicitrate ABC transporter substrate-binding protein FecB [Pectobacterium]
group_2242	BY21311_03571	DPMP315_02730	alanine racemase [Pectobacterium]
group_2243	BY21311_01970	DPMP315_01586	YebW family protein [Pectobacterium]
group_2244	BY21311_00782	DPMP315_02616	glycoside-pentoside-hexuronide (GPH):cation symporter [Pectobacterium]
group_2245	BY21311_03374	DPMP315_02133	HNH nuclease YajD [Pectobacterium]
group_2246	BY21311_02502	DPMP315_02544	heme exporter protein CcmB [Pectobacterium]
group_2247	BY21311_00104	DPMP315_01184	cellulose biosynthesis protein BcsF [Pectobacterium]
group_2248	BY21311_00693	DPMP315_04357	DNA polymerase III subunit psi [Pectobacterium]
group_2249	BY21311_00734	DPMP315_04316	helix-turn-helix transcriptional regulator [Pectobacterium]
group_225	BY21311_02040	DPMP315_01656	23S rRNA (guanine(745)-N(1))-methyltransferase [Pectobacterium]
group_2250	BY21311_01177	DPMP315_00190	transcription antitermination factor NusB [Pectobacterium]
group_2251	BY21311_03109	DPMP315_03488	AEC family transporter [Pectobacterium]
group_2252	BY21311_01673	DPMP315_03798	class IV adenylate cyclase [Pectobacterium]
group_2253	BY21311_04137	DPMP315_04112	ATP-dependent RNA helicase RhlB [Pectobacterium]
group_2254	BY21311_04329	DPMP315_00634	glutamate--ammonia ligase [Pectobacterium]
group_2255	BY21311_00206	DPMP315_03098	sugar ABC transporter permease YjfF [Pectobacterium]
group_2256	BY21311_01210	DPMP315_00223	ammonium transporter AmtB [Pectobacterium]
group_2257	BY21311_02176	DPMP315_00913	helix-turn-helix domain-containing protein [Pectobacterium]
group_2258	BY21311_03515	DPMP315_00776	50S ribosomal protein L9 [Pectobacterium]
group_2259	BY21311_02582	DPMP315_01242	acyl carrier protein [Bacteria]
group_226	BY21311_02073	DPMP315_01688	hypothetical protein [Pectobacterium]
group_2260	BY21311_00885	DPMP315_00520	GNAT family N-acetyltransferase [Pectobacterium]
group_2261	BY21311_02019	DPMP315_01635	osmotically-inducible lipoprotein OsmE [Pectobacterium]
group_2262	BY21311_03159	DPMP315_03535	tryptophan synthase subunit beta [Pectobacterium]
group_2263	BY21311_00115	DPMP315_01174	sulfurtransferase TusA [Pectobacterium]
group_2264	BY21311_03365	DPMP315_02124	xanthine phosphoribosyltransferase [Pectobacterium]
group_2265	BY21311_00154	DPMP315_01138	tRNA (cytidine(34)-2'-O)-methyltransferase [Pectobacterium]
group_2266	BY21311_03227	DPMP315_02225	carbonate dehydratase [Pectobacterium]
group_2267	BY21311_00740	DPMP315_02632	NCS2 family permease [Pectobacterium]
group_2268	BY21311_03912	DPMP315_02406	50S ribosomal protein L14 [Bacteria]
group_2269	BY21311_03504	DPMP315_00787	hypothetical protein
group_227	BY21311_02099	DPMP315_01714	hypothetical protein [Pectobacterium]
group_2270	BY21311_00752	DPMP315_02644	type II secretion system F family protein [Pectobacterium]
group_2271	BY21311_03823	DPMP315_02975	HlyD family efflux transporter periplasmic adaptor subunit [Pectobacterium]
group_2272	BY21311_00256	DPMP315_03041	preprotein translocase subunit SecE [Pectobacterium]
group_2273	BY21311_04396	DPMP315_01568	CsgG/HfaB family protein [Pectobacterium]
group_2274	BY21311_02372	DPMP315_01928	hypothetical protein [Pectobacterium]
group_2275	BY21311_01903	DPMP315_02329	membrane integrity-associated transporter subunit PqiA [Pectobacterium]
group_2276	BY21311_01680	DPMP315_03791	ABC transporter ATP-binding protein [Pectobacterium]
group_2277	BY21311_00336	DPMP315_03894	ribosome hibernation promoting factor [Pectobacterium]
group_2278	BY21311_03090	DPMP315_03469	hypothetical protein
group_2279	BY21311_03425	DPMP315_00865	methionine ABC transporter permease MetI [Pectobacterium]
group_228	BY21311_02100	DPMP315_01715	hypothetical protein
group_2280	BY21311_02890	DPMP315_03293	YfbU family protein [Pectobacterium]
group_2281	BY21311_03381	DPMP315_02140	amidohydrolase [Pectobacterium]
group_2282	BY21311_04360	DPMP315_03016	16S rRNA (guanine(527)-N(7))-methyltransferase RsmG [Pectobacterium]
group_2283	BY21311_02047	DPMP315_01663	L-serine ammonia-lyase [Pectobacterium]
group_2284	BY21311_03776	DPMP315_02929	IclR family transcriptional regulator [Pectobacterium]
group_2285	BY21311_02023	DPMP315_01639	porin [Pectobacterium]
group_2286	BY21311_01326	DPMP315_00339	ribosome silencing factor [Pectobacterium]
group_2287	BY21311_02343	DPMP315_01899	gamma-glutamylcyclotransferase [Pectobacterium]
group_2288	BY21311_02265	DPMP315_01819	porin [Pectobacterium]
group_229	BY21311_02166	DPMP315_00923	MFS transporter [Pectobacterium]
group_2290	BY21311_00171	DPMP315_01121	1,4-dihydroxy-2-naphthoate polyprenyltransferase [Pectobacterium]
group_2291	BY21311_03584	DPMP315_02739	single-stranded DNA-binding protein SSB1 [Pectobacterium]
group_2292	BY21311_01046	DPMP315_00060	thymidylate synthase [Pectobacterium]
group_2293	BY21311_00814	DPMP315_02589	extracellular solute-binding protein [Pectobacterium]
group_2294	BY21311_00035	DPMP315_01513	PTS sugar transporter subunit IIC [Pectobacterium]
group_2295	BY21311_02552	DPMP315_01214	NAD-dependent protein deacylase [Pectobacterium]
group_2296	BY21311_00855	DPMP315_00492	sulfate transporter CysZ [Pectobacterium]
group_2297	BY21311_02139	DPMP315_01754	YciN family protein [Pectobacterium]
group_2298	BY21311_02961	DPMP315_03364	type II secretion system minor pseudopilin GspI [Pectobacterium]
group_2299	BY21311_04095	DPMP315_04070	diaminopimelate epimerase [Pectobacterium]
group_23	BY21311_00237 BY21311_04380	DPMP315_03068	amino acid ABC transporter ATP-binding protein [Pectobacterium]
group_230	BY21311_02170	DPMP315_00919	MFS transporter [Pectobacterium]
group_2300	BY21311_02709	DPMP315_02278	chemotaxis protein CheW [Pectobacterium]
group_2301	BY21311_01148	DPMP315_00162	nucleoside permease [Pectobacterium]
group_2302	BY21311_03819	DPMP315_02971	alkyl hydroperoxide reductase subunit C [Pectobacterium]
group_2303	BY21311_01983	DPMP315_01599	peptidase T [Pectobacterium]
group_2304	BY21311_00616	DPMP315_04429	altronate dehydratase family protein [Pectobacterium]
group_2305	BY21311_01191	DPMP315_00204	cytochrome o ubiquinol oxidase subunit II [Pectobacterium]
group_2306	BY21311_01626	DPMP315_02481	NAD-dependent malic enzyme [Pectobacterium]
group_2307	BY21311_03997	DPMP315_01438	ribosome-associated heat shock protein Hsp15 [Pectobacterium]
group_2308	BY21311_03264	DPMP315_01329	inner membrane protein YpjD [Pectobacterium]
group_2309	BY21311_04406	DPMP315_01558	helix-turn-helix transcriptional regulator [Pectobacterium]
group_231	BY21311_02181	DPMP315_00908	hypothetical protein
group_2310	BY21311_01146	DPMP315_00160	pyrimidine/purine nucleoside phosphorylase [Pectobacterium]
group_2311	BY21311_00071	DPMP315_03150	Hcp family type VI secretion system effector [Pectobacterium]
group_2312	BY21311_03512	DPMP315_00779	hypothetical protein
group_2313	BY21311_03904	DPMP315_02398	50S ribosomal protein L15 [Pectobacterium]
group_2314	BY21311_02039	DPMP315_01655	transcription antiterminator/RNA stability regulator CspE [Proteobacteria]
group_2315	BY21311_00316	DPMP315_03874	protein-methionine-sulfoxide reductase catalytic subunit MsrP [Pectobacterium]
group_2316	BY21311_01328	DPMP315_00341	DNA polymerase III subunit delta [Pectobacterium]
group_2317	BY21311_02123	DPMP315_01738	septation protein A [Pectobacterium]
group_2318	BY21311_03448	DPMP315_00842	PilZ domain-containing protein [Pectobacterium]
group_2319	BY21311_02643	DPMP315_01301	Flp family type IVb pilin [Pectobacterium]
group_232	BY21311_02226	DPMP315_01778	hypothetical protein
group_2320	BY21311_03932	DPMP315_02426	sulfurtransferase complex subunit TusC [Pectobacterium]
group_2321	BY21311_02952	DPMP315_03355	iron ABC transporter permease [Pectobacterium]
group_2322	BY21311_04341	DPMP315_00622	molybdopterin-guanine dinucleotide biosynthesis protein MobB [Pectobacterium]
group_2323	BY21311_00802	DPMP315_02601	RnfH family protein [Pectobacterium]
group_2324	BY21311_02505	DPMP315_02547	heme lyase NrfEFG subunit NrfF [Pectobacterium]
group_2325	BY21311_01583	DPMP315_04301	chemotaxis protein [Pectobacterium]
group_2326	BY21311_02868	DPMP315_03271	hypothetical protein
group_2327	BY21311_00338	DPMP315_03896	LPS export ABC transporter ATP-binding protein [Pectobacterium]
group_2328	BY21311_02561	DPMP315_01222	molecular chaperone [Pectobacterium]
group_2329	BY21311_03665	DPMP315_02819	nucleoside-specific channel-forming protein Tsx [Pectobacterium]
dmlR	BY21311_02227	DPMP315_01779	HTH-type transcriptional regulator DmlR
group_2330	BY21311_03984	DPMP315_01426	SPOR domain-containing protein [Pectobacterium]
group_2331	BY21311_00258	DPMP315_03043	50S ribosomal protein L11 [Pectobacterium]
group_2332	BY21311_00785	DPMP315_02613	LysE family transporter [Pectobacterium]
group_2333	BY21311_00636	DPMP315_04412	hypothetical protein
group_2334	BY21311_01380	DPMP315_00393	succinate dehydrogenase membrane anchor subunit [Pectobacterium]
group_2335	BY21311_04021	DPMP315_01462	ABC transporter ATP-binding protein [Pectobacterium]
group_2336	BY21311_01125	DPMP315_00140	sigma-70 family RNA polymerase sigma factor [Pectobacterium]
group_2337	BY21311_01645	DPMP315_02462	molybdopterin synthase sulfur carrier subunit [Pectobacterium]
group_2338	BY21311_00827	DPMP315_02576	triose-phosphate isomerase [Pectobacterium]
group_2339	BY21311_02169	DPMP315_00920	dethiobiotin synthase [Pectobacterium]
group_234	BY21311_02230	DPMP315_01782	RNA ligase family protein [Pectobacterium]
group_2340	BY21311_01795	DPMP315_03665	putrescine ABC transporter permease PotI [Pectobacterium]
group_2341	BY21311_02492	DPMP315_02534	quinol dehydrogenase ferredoxin subunit NapH [Pectobacterium]
group_2342	BY21311_00445	DPMP315_04006	ornithine carbamoyltransferase [Pectobacterium]
group_2343	BY21311_02355	DPMP315_01911	helix-turn-helix domain-containing protein [Pectobacterium]
group_2344	BY21311_00843	DPMP315_00479	sulfate ABC transporter substrate-binding protein [Pectobacterium]
group_2345	BY21311_00775	DPMP315_02623	aminotransferase class I/II-fold pyridoxal phosphate-dependent enzyme [Pectobacterium]
group_2346	BY21311_02818	DPMP315_03122	amino acid ABC transporter ATP-binding protein [Pectobacterium]
group_2347	BY21311_02682	DPMP315_02305	flagellar biosynthetic protein FliO [Pectobacterium]
group_2348	BY21311_01370	DPMP315_00383	2-thiouracil desulfurase family protein [Pectobacterium]
group_2349	BY21311_03615	DPMP315_02769	TerD family protein [Pectobacterium]
group_235	BY21311_02233	DPMP315_01785	hypothetical protein [Pectobacterium]
group_2350	BY21311_04330	DPMP315_00633	nitrogen regulation protein NR(II) [Pectobacterium]
group_2351	BY21311_00390	DPMP315_03947	fructose PTS transporter subunit IIB [Pectobacterium]
group_2352	BY21311_03856	DPMP315_02671	succinate dehydrogenase/fumarate reductase iron-sulfur subunit [Pectobacterium]
group_2353	BY21311_00659	DPMP315_04389	ATP-dependent zinc metalloprotease FtsH [Pectobacterium]
group_2354	BY21311_00081	DPMP315_03141	hypothetical protein [Pectobacterium]
group_2355	BY21311_03671	DPMP315_02825	dephospho-CoA kinase [Pectobacterium]
group_2356	BY21311_01892	DPMP315_02340	aspartate/tyrosine/aromatic aminotransferase [Pectobacterium]
group_2357	BY21311_01837	DPMP315_03631	pyruvate formate lyase 1-activating protein [Pectobacterium]
group_2358	BY21311_03788	DPMP315_02941	small-conductance mechanosensitive channel MscS [Pectobacterium]
group_2359	BY21311_00219	DPMP315_03085	acetylornithine deacetylase [Pectobacterium]
group_236	BY21311_02234	DPMP315_01786	VOC family protein [Pectobacterium]
group_2360	BY21311_03562	DPMP315_02721	MBL fold metallo-hydrolase [Pectobacterium]
group_2361	BY21311_01418	DPMP315_00431	molybdenum-dependent transcriptional regulator [Pectobacterium]
group_2362	BY21311_03951	DPMP315_02445	phosphoribulokinase [Pectobacterium]
group_2363	BY21311_01721	DPMP315_03750	threonine/homoserine exporter RhtA [Pectobacterium]
group_2364	BY21311_03371	DPMP315_02130	class II glutamine amidotransferase [Pectobacterium]
group_2365	BY21311_01229	DPMP315_00242	adenylate kinase [Pectobacterium]
group_2366	BY21311_00666	DPMP315_04383	ribosome maturation factor RimP [Pectobacterium]
group_2367	BY21311_02156	DPMP315_01771	arabinose operon transcriptional regulator AraC [Pectobacterium]
group_2368	BY21311_03016	DPMP315_03395	iron ABC transporter permease [Pectobacterium]
group_2369	BY21311_00993	DPMP315_00033	alpha/beta hydrolase [Pectobacterium]
group_237	BY21311_02235	DPMP315_01787	histidinol-phosphatase [Pectobacterium]
group_2370	BY21311_03574	DPMP315_02733	Lrp/AsnC family transcriptional regulator [Pectobacterium]
group_2371	BY21311_02417	DPMP315_01973	LapA family protein [Pectobacterium]
group_2372	BY21311_02058	DPMP315_01674	septum site-determining protein MinD [Pectobacterium]
group_2373	BY21311_02531	DPMP315_02573	FAD:protein FMN transferase ApbE [Pectobacterium]
group_2374	BY21311_00368	DPMP315_03925	divisome-associated lipoprotein YraP [Pectobacterium]
group_2375	BY21311_01849	DPMP315_03619	imidazole glycerol phosphate synthase subunit HisH [Pectobacterium]
group_2376	BY21311_01973	DPMP315_01589	membrane integrity lipid transport subunit YebS [Pectobacterium]
group_2377	BY21311_01213	DPMP315_00226	MGMT family protein [Pectobacterium]
group_2378	BY21311_03038	DPMP315_03417	hypothetical protein [Pectobacterium]
group_2379	BY21311_03858	DPMP315_02673	fumarate reductase subunit FrdD [Pectobacterium]
group_238	BY21311_02238	DPMP315_01790	LacI family DNA-binding transcriptional regulator [Pectobacterium]
group_2380	BY21311_03202	DPMP315_02201	5'-methylthioadenosine/S-adenosylhomocysteine nucleosidase [Pectobacterium]
group_2381	BY21311_01950	DPMP315_00967	MurR/RpiR family transcriptional regulator [Pectobacterium]
group_2382	BY21311_03136	DPMP315_03514	hypothetical protein [Pectobacterium]
group_2383	BY21311_02816	DPMP315_03120	amino acid ABC transporter permease [Pectobacterium]
group_2384	BY21311_00690	DPMP315_04360	discoidin domain-containing protein [Pectobacterium]
group_2385	BY21311_00101	DPMP315_01187	cellulose biosynthesis protein BcsQ [Pectobacterium]
group_2386	BY21311_01438	DPMP315_00451	iron-sulfur cluster carrier protein ApbC [Pectobacterium]
group_2387	BY21311_04299	DPMP315_00663	sigma-70 family RNA polymerase sigma factor [Pectobacterium]
group_2388	BY21311_01817	DPMP315_03649	ATP-dependent Clp protease adapter ClpS [Pectobacterium]
group_2389	BY21311_03234	DPMP315_02232	adenosylmethionine decarboxylase [Pectobacterium]
group_239	BY21311_02297	DPMP315_01851	type III secretion protein [Pectobacterium]
group_2390	BY21311_02522	DPMP315_02564	cysteine desulfurase SufS [Pectobacterium]
group_2391	BY21311_04174	DPMP315_04150	dienelactone hydrolase family protein [Pectobacterium]
group_2392	BY21311_00447	DPMP315_04008	GNAT family N-acetyltransferase [Pectobacterium]
group_2393	BY21311_02357	DPMP315_01913	fimbrial protein [Pectobacterium]
group_2394	BY21311_01134	DPMP315_00148	SiaB family protein kinase [Pectobacterium]
group_2395	BY21311_03113	DPMP315_03492	histidine--tRNA ligase [Pectobacterium]
group_2396	BY21311_02053	DPMP315_01669	tRNA (adenosine(37)-N6)-threonylcarbamoyltransferase complex dimerization subunit type 1 TsaB [Pectobacterium]
group_2397	BY21311_02292	DPMP315_01846	RNA polymerase sigma factor [Pectobacterium]
group_2398	BY21311_01356	DPMP315_00369	flavodoxin FldA [Pectobacterium]
group_2399	BY21311_02435	DPMP315_01991	hypothetical protein
group_24	BY21311_00285 BY21311_04342	DPMP315_00621	hypothetical protein
group_240	BY21311_02327	DPMP315_01883	helix-turn-helix transcriptional regulator [Pectobacterium]
group_2400	BY21311_03617	DPMP315_02771	TerC/Alx family metal homeostasis membrane protein [Pectobacterium]
group_2401	BY21311_00722	DPMP315_04328	protein YgfX [Pectobacterium]
group_2402	BY21311_01784	DPMP315_03677	DNA-binding transcriptional repressor DeoR [Pectobacterium]
group_2403	BY21311_01218	DPMP315_00231	efflux RND transporter permease subunit [Pectobacterium]
group_2404	BY21311_03257	DPMP315_01322	hypothetical protein
group_2405	BY21311_03337	DPMP315_01399	type VI secretion system lipoprotein TssJ [Pectobacterium]
group_2406	BY21311_00124	DPMP315_01165	RNA polymerase sigma factor RpoH [Pectobacterium]
group_2407	BY21311_01114	DPMP315_00125	YaeP family protein [Pectobacterium]
group_2408	BY21311_00848	DPMP315_00484	efflux RND transporter periplasmic adaptor subunit [Pectobacterium]
group_2409	BY21311_01369	DPMP315_00382	YbfA family protein [Pectobacterium]
group_241	BY21311_02389	DPMP315_01945	envelope stress response membrane protein PspC [Pectobacterium]
group_2410	BY21311_03029	DPMP315_03408	cysteine--tRNA ligase [Pectobacterium]
group_2411	BY21311_03692	DPMP315_02846	16S rRNA (cytosine(1402)-N(4))-methyltransferase RsmH [Pectobacterium]
group_2412	BY21311_01082	DPMP315_00094	NADPH-dependent 7-cyano-7-deazaguanine reductase QueF [Pectobacterium]
ykgO	BY21311_01216	DPMP315_00229	50S ribosomal protein L36 2
group_2414	BY21311_00228	DPMP315_03077	Sec-independent protein translocase subunit TatA [Pectobacterium]
group_2415	BY21311_00344	DPMP315_03902	phospholipid ABC transporter ATP-binding protein MlaF [Pectobacterium]
group_2416	BY21311_01712	DPMP315_03759	phage tail protein I [Pectobacterium]
group_2417	BY21311_03637	DPMP315_02790	D-allulose 6-phosphate 3-epimerase [Pectobacterium]
group_2418	BY21311_03482	DPMP315_00807	PAS domain-containing methyl-accepting chemotaxis protein [Pectobacterium]
group_2419	BY21311_02922	DPMP315_03325	chorismate synthase [Pectobacterium]
group_242	BY21311_02402	DPMP315_01958	hypothetical protein [Pectobacterium]
group_2420	BY21311_03703	DPMP315_02857	3-isopropylmalate dehydratase small subunit [Pectobacterium]
group_2421	BY21311_03013	DPMP315_03392	cupin domain-containing protein [Pectobacterium]
group_2422	BY21311_02153	DPMP315_01768	arabinose ABC transporter substrate-binding protein [Pectobacterium]
group_2423	BY21311_01238	DPMP315_00250	glycoside hydrolase family 28 protein [Pectobacterium]
group_2424	BY21311_03434	DPMP315_00856	2-C-methyl-D-erythritol 2,4-cyclodiphosphate synthase [Pectobacterium]
group_2425	BY21311_01358	DPMP315_00371	LexA regulated protein [Pectobacterium]
group_2426	BY21311_01976	DPMP315_01592	carboxy terminal-processing peptidase [Pectobacterium]
group_2427	BY21311_00439	DPMP315_04001	2-iminobutanoate/2-iminopropanoate deaminase [Pectobacterium]
group_2428	BY21311_03783	DPMP315_02936	MFS transporter [Pectobacterium]
group_2429	BY21311_02346	DPMP315_01902	C4-dicarboxylic acid transporter DauA [Pectobacterium]
group_243	BY21311_02418	DPMP315_01974	sugar-binding transcriptional regulator [Pectobacterium]
group_2430	BY21311_00456	DPMP315_04017	LPS export ABC transporter permease LptF [Pectobacterium]
group_2431	BY21311_03367	DPMP315_02126	DNA polymerase IV [Pectobacterium]
group_2432	BY21311_01043	DPMP315_00058	phosphoenolpyruvate--protein phosphotransferase [Pectobacterium]
group_2433	BY21311_03921	DPMP315_02415	50S ribosomal protein L4 [Pectobacterium]
group_2434	BY21311_03225	DPMP315_02223	ABC transporter permease [Pectobacterium]
group_2435	BY21311_00613	DPMP315_04432	MFS transporter [Pectobacterium]
group_2436	BY21311_01865	DPMP315_02367	citrate lyase subunit alpha [Pectobacterium]
group_2437	BY21311_02128	DPMP315_01743	tryptophan synthase subunit beta [Pectobacterium]
group_2438	BY21311_03443	DPMP315_00847	sulfate adenylyltransferase subunit CysD [Pectobacterium]
group_2439	BY21311_02691	DPMP315_02296	flagellar basal body L-ring protein FlgH [Pectobacterium]
group_244	BY21311_02431	DPMP315_01987	hypothetical protein
group_2440	BY21311_01639	DPMP315_02468	glyoxalase [Pectobacterium]
group_2441	BY21311_02026	DPMP315_01642	carbohydrate ABC transporter permease [Pectobacterium]
group_2442	BY21311_03773	DPMP315_02926	LysR family transcriptional regulator ArgP [Pectobacterium]
group_2443	BY21311_03427	DPMP315_00863	Rcs stress response system protein RcsF [Pectobacterium]
group_2444	BY21311_01290	DPMP315_00303	biopolymer transporter ExbD [Pectobacterium]
group_2445	BY21311_02401	DPMP315_01957	enoyl-ACP reductase FabI [Pectobacterium]
group_2446	BY21311_03826	DPMP315_02978	ABC transporter ATP-binding protein [Pectobacterium]
group_2447	BY21311_02045	DPMP315_01661	PTS mannose transporter subunit IIAB [Pectobacterium]
group_2448	BY21311_01906	DPMP315_02326	ribosome modulation factor [Pectobacterium]
group_2449	BY21311_01588	DPMP315_04306	NAD(P)-dependent oxidoreductase [Pectobacterium]
gltR	BY21311_02463	DPMP315_02015	HTH-type transcriptional regulator GltR
group_2450	BY21311_00333	DPMP315_03891	PTS phosphocarrier protein NPr [Pectobacterium]
group_2451	BY21311_04208	DPMP315_00749	50S ribosomal protein L28 [Pectobacterium]
group_2452	BY21311_03742	DPMP315_02895	signal peptidase II [Pectobacterium]
group_2453	BY21311_02267	DPMP315_01821	extracellular solute-binding protein [Pectobacterium]
group_2454	BY21311_02180	DPMP315_00909	diaminobutyrate--2-oxoglutarate transaminase [Pectobacterium]
group_2455	BY21311_02907	DPMP315_03310	cell division protein DedD [Pectobacterium]
group_2456	BY21311_00037	DPMP315_01511	hypothetical protein
group_2457	BY21311_02325	DPMP315_01881	hypothetical protein [Pectobacterium]
group_2458	BY21311_04097	DPMP315_04072	iron donor protein CyaY [Pectobacterium]
group_2459	BY21311_03995	DPMP315_01436	intracellular growth attenuator family protein [Pectobacterium]
group_246	BY21311_02480	DPMP315_02020	DeoR/GlpR family DNA-binding transcription regulator [Pectobacterium]
group_2460	BY21311_02080	DPMP315_01695	YeaH/YhbH family protein [Pectobacterium]
group_2461	BY21311_04104	DPMP315_04079	GntR family transcriptional regulator [Pectobacterium]
group_2462	BY21311_02625	DPMP315_01283	methylglyoxal synthase [Pectobacterium]
group_2463	BY21311_04132	DPMP315_04107	UDP-N-acetylglucosamine 2-epimerase (non-hydrolyzing) [Pectobacterium]
group_2464	BY21311_01920	DPMP315_00939	Gfo/Idh/MocA family oxidoreductase [Pectobacterium]
group_2465	BY21311_00192	DPMP315_01100	DNA-binding transcriptional regulator OxyR [Pectobacterium]
group_2466	BY21311_01619	DPMP315_02488	nitroreductase family protein [Pectobacterium]
group_2467	BY21311_01172	DPMP315_00185	protein translocase subunit SecF [Pectobacterium]
group_2468	BY21311_00313	DPMP315_03871	acetyl-CoA carboxylase biotin carboxyl carrier protein [Pectobacterium]
group_2469	BY21311_03163	DPMP315_02161	HlyD family type I secretion periplasmic adaptor subunit [Pectobacterium]
group_247	BY21311_02481	DPMP315_02021	HAD-IIB family hydrolase [Pectobacterium]
group_2470	BY21311_04184	DPMP315_04160	rhodanese-like domain-containing protein [Pectobacterium]
group_2471	BY21311_03667	DPMP315_02821	prepilin peptidase-dependent pilin [Pectobacterium]
group_2472	BY21311_02594	DPMP315_01254	dihydroorotase [Pectobacterium]
group_2473	BY21311_02126	DPMP315_01741	porin [Pectobacterium]
group_2474	BY21311_02646	DPMP315_01304	flagella biosynthesis regulatory protein FliZ [Pectobacterium]
group_2475	BY21311_00787	DPMP315_02611	hypothetical protein
group_2476	BY21311_01259	DPMP315_00271	1,4-dihydroxy-2-naphthoyl-CoA synthase [Pectobacterium]
group_2477	BY21311_00017	DPMP315_01535	sugar-phosphatase [Pectobacterium]
group_2478	BY21311_02224	DPMP315_01776	surface-adhesin E family protein [Pectobacterium]
group_2479	BY21311_01339	DPMP315_00352	PhoH family protein [Pectobacterium]
group_248	BY21311_02482	DPMP315_02022	multidrug efflux SMR transporter [Pectobacterium]
group_2480	BY21311_01127	DPMP315_00142	alkylphosphonate utilization protein [Pectobacterium]
group_2481	BY21311_01751	DPMP315_03710	elongation factor P-like protein YeiP [Pectobacterium]
group_2482	BY21311_03880	DPMP315_02697	homoserine O-succinyltransferase [Pectobacterium]
group_2483	BY21311_01667	DPMP315_03804	ABC transporter substrate-binding protein [Pectobacterium]
group_2484	BY21311_02579	DPMP315_01239	endolytic transglycosylase MltG [Pectobacterium]
group_2485	BY21311_01163	DPMP315_00176	proline-specific permease ProY [Pectobacterium]
group_2486	BY21311_00334	DPMP315_03892	RNase adapter RapZ [Pectobacterium]
group_2487	BY21311_01880	DPMP315_02352	hypothetical protein [Pectobacterium]
group_2488	BY21311_03127	DPMP315_03505	iron-sulfur cluster assembly protein IscA [Pectobacterium]
group_2489	BY21311_03339	DPMP315_01401	type VI secretion system baseplate subunit TssG [Pectobacterium]
group_249	BY21311_02485	DPMP315_02527	AEC family transporter [Pectobacterium]
group_2490	BY21311_04412	DPMP315_01552	hypothetical protein
group_2491	BY21311_03143	DPMP315_03521	NO-inducible flavohemoprotein [Pectobacterium]
group_2492	BY21311_00215	DPMP315_03089	threonine ammonia-lyase, biosynthetic [Pectobacterium]
group_2493	BY21311_02428	DPMP315_01984	phosphatidylglycerophosphatase B [Pectobacterium]
group_2494	BY21311_03259	DPMP315_01324	50S ribosomal protein L19 [Pectobacterium]
group_2495	BY21311_04307	DPMP315_00655	universal stress protein UspB [Pectobacterium]
group_2496	BY21311_01324	DPMP315_00337	peptidoglycan DD-transpeptidase MrdA [Pectobacterium]
group_2497	BY21311_01248	DPMP315_00260	ribonucleotide-diphosphate reductase subunit beta [Pectobacterium]
group_2498	BY21311_00382	DPMP315_03939	3',5'-cyclic-AMP phosphodiesterase [Pectobacterium]
group_2499	BY21311_01291	DPMP315_00304	MotA/TolQ/ExbB proton channel family protein [Pectobacterium]
group_25	BY21311_00363 BY21311_00364	DPMP315_03921	aerobic respiration two-component sensor histidine kinase ArcB [Pectobacterium]
group_250	BY21311_02496	DPMP315_02538	cytochrome c-type biogenesis protein CcmH [Pectobacterium]
group_2500	BY21311_03774	DPMP315_02927	oxidative stress defense protein [Pectobacterium]
group_2501	BY21311_00449	DPMP315_04010	M48 family metallopeptidase [Pectobacterium]
group_2502	BY21311_00069	DPMP315_03152	hypothetical protein
group_2503	BY21311_01995	DPMP315_01611	helix-turn-helix transcriptional regulator [Pectobacterium]
group_2504	BY21311_00614	DPMP315_04431	glucuronate isomerase [Pectobacterium]
group_2505	BY21311_03172	DPMP315_02170	signal peptidase I [Pectobacterium]
group_2506	BY21311_03619	DPMP315_02773	TerD family protein [Pectobacterium]
group_2507	BY21311_03920	DPMP315_02414	50S ribosomal protein L23 [Pectobacteriaceae]
group_2508	BY21311_03908	DPMP315_02402	30S ribosomal protein S8 [Pectobacterium]
group_2509	BY21311_03072	DPMP315_03451	two-component system sensor histidine kinase BaeS [Pectobacterium]
group_251	BY21311_02521	DPMP315_02563	cysteine desulfuration protein SufE [Pectobacterium]
group_2510	BY21311_03588	DPMP315_02743	carbohydrate ABC transporter permease [Pectobacterium]
group_2511	BY21311_02390	DPMP315_01946	envelope stress response membrane protein PspB [Pectobacterium]
group_2512	BY21311_03906	DPMP315_02400	50S ribosomal protein L18 [Pectobacterium]
group_2513	BY21311_02247	DPMP315_01797	LLM class flavin-dependent oxidoreductase [Pectobacterium]
group_2514	BY21311_03762	DPMP315_02915	MDR efflux pump AcrAB transcriptional activator RobA [Pectobacterium]
group_2515	BY21311_00682	DPMP315_04368	hypothetical protein [Pectobacterium]
group_2516	BY21311_04295	DPMP315_00667	23S rRNA (adenine(2030)-N(6))-methyltransferase RlmJ [Pectobacterium]
group_2517	BY21311_02593	DPMP315_01253	antibiotic biosynthesis monooxygenase [Pectobacterium]
group_2518	BY21311_01472	DPMP315_04189	PRD domain-containing protein [Pectobacterium]
group_2519	BY21311_00169	DPMP315_01123	septal ring assembly protein ZapB [Pectobacterium]
group_252	BY21311_02534	DPMP315_01196	kinase/pyrophosphorylase [Pectobacterium]
group_2520	BY21311_03164	DPMP315_02162	sensor domain-containing diguanylate cyclase [Pectobacterium]
group_2521	BY21311_00355	DPMP315_03913	50S ribosomal protein L13 [Pectobacterium]
group_2522	BY21311_01742	DPMP315_03719	Bcr/CflA family multidrug efflux MFS transporter [Pectobacterium]
group_2523	BY21311_02445	DPMP315_02000	hypothetical protein
group_2524	BY21311_03986	DPMP315_01428	shikimate kinase AroK [Pectobacteriaceae]
group_2525	BY21311_03801	DPMP315_02953	glutathione synthase [Pectobacterium]
group_2526	BY21311_03027	DPMP315_03406	bifunctional methylenetetrahydrofolate dehydrogenase/methenyltetrahydrofolate cyclohydrolase FolD [Pectobacterium]
group_2527	BY21311_03508	DPMP315_00783	flavodoxin family protein [Pectobacterium]
group_2528	BY21311_00602	DPMP315_04443	pirin family protein [Pectobacterium]
group_2529	BY21311_03043	DPMP315_03422	hypothetical protein
group_253	BY21311_02559	DPMP315_01220	oxidoreductase [Pectobacterium]
group_2530	BY21311_01427	DPMP315_00440	MFS transporter [Pectobacterium]
group_2531	BY21311_00158	DPMP315_01134	envelope stress response regulator transcription factor CpxR [Pectobacterium]
group_2532	BY21311_01845	DPMP315_03623	integration host factor subunit beta [Pectobacterium]
group_2533	BY21311_03639	DPMP315_02792	ABC transporter permease [Pectobacterium]
group_2534	BY21311_02366	DPMP315_01922	YnbE family lipoprotein [Pectobacterium]
group_2535	BY21311_02081	DPMP315_01696	protein kinase YeaG [Pectobacterium]
group_2536	BY21311_00123	DPMP315_01166	permease-like cell division protein FtsX [Pectobacterium]
group_2537	BY21311_03976	DPMP315_01418	ABC transporter permease [Pectobacterium]
group_2538	BY21311_00643	DPMP315_04405	30S ribosomal protein S21 [Bacteria]
group_2539	BY21311_01434	DPMP315_00447	formate dehydrogenase-N subunit gamma [Pectobacterium]
group_254	BY21311_02560	DPMP315_01221	AraC family transcriptional regulator [Pectobacterium]
group_2540	BY21311_02316	DPMP315_01872	hypothetical protein
group_2541	BY21311_03034	DPMP315_03413	5-(carboxyamino)imidazole ribonucleotide synthase [Pectobacterium]
group_2542	BY21311_02135	DPMP315_01750	23S rRNA pseudouridine(2605) synthase RluB [Pectobacterium]
group_2543	BY21311_02705	DPMP315_02282	chemotaxis response regulator CheY [Pectobacterium]
group_2544	BY21311_04099	DPMP315_04074	class I adenylate cyclase [Pectobacterium]
group_2545	BY21311_02909	DPMP315_03312	acetyl-CoA carboxylase, carboxyltransferase subunit beta [Pectobacterium]
group_2546	BY21311_00039	DPMP315_01509	YceK/YidQ family lipoprotein [Pectobacterium]
group_2547	BY21311_01317	DPMP315_00330	Sec-independent protein translocase subunit TatA [Pectobacterium]
group_2548	BY21311_02882	DPMP315_03285	NADH-quinone oxidoreductase subunit C/D [Pectobacterium]
group_2549	BY21311_02269	DPMP315_01824	hypothetical protein [Pectobacterium]
group_255	BY21311_02563	DPMP315_01224	MFS transporter [Pectobacterium]
group_2551	BY21311_02636	DPMP315_01294	tellurite resistance TerB family protein [Pectobacterium]
group_2552	BY21311_00119	DPMP315_01170	hypothetical protein
group_2553	BY21311_03114	DPMP315_03493	flavodoxin-dependent (E)-4-hydroxy-3-methylbut-2-enyl-diphosphate synthase [Pectobacterium]
group_2554	BY21311_00672	DPMP315_04378	30S ribosomal protein S15 [Bacteria]
group_2555	BY21311_02015	DPMP315_01631	nitrous oxide-stimulated promoter family protein [Pectobacterium]
group_2556	BY21311_03155	DPMP315_03531	phosphatidylglycerophosphatase C [Pectobacterium]
group_2557	BY21311_01133	DPMP315_00147	hypothetical protein
group_2558	BY21311_03712	DPMP315_02865	thiamine ABC transporter substrate binding subunit [Pectobacterium]
group_2559	BY21311_01637	DPMP315_02470	hypothetical protein
group_256	BY21311_02589	DPMP315_01249	Maf-like protein [Pectobacterium]
group_2560	BY21311_00505	DPMP315_01031	L-rhamnose mutarotase [Pectobacterium]
group_2561	BY21311_01349	DPMP315_00362	asparagine synthase B [Pectobacterium]
group_2562	BY21311_00868	DPMP315_00504	LysR family transcriptional regulator [Pectobacterium]
group_2563	BY21311_04173	DPMP315_04149	uridine phosphorylase [Pectobacterium]
group_2564	BY21311_02338	DPMP315_01894	NarK family nitrate/nitrite MFS transporter [Pectobacterium]
group_2565	BY21311_01853	DPMP315_03615	ATP phosphoribosyltransferase [Pectobacterium]
group_2566	BY21311_02336	DPMP315_01892	nitrate reductase subunit beta [Pectobacterium]
group_2567	BY21311_03218	DPMP315_02216	RNA polymerase-binding protein DksA [Pectobacterium]
group_2568	BY21311_00985	DPMP315_00025	carboxymuconolactone decarboxylase family protein [Pectobacterium]
group_2569	BY21311_03669	DPMP315_02823	protein transport protein HofC [Pectobacterium]
group_257	BY21311_02627	DPMP315_01285	YccF domain-containing protein [Pectobacterium]
group_2570	BY21311_00866	DPMP315_00502	nitric oxide reductase transcriptional regulator NorR [Pectobacterium]
group_2571	BY21311_03784	DPMP315_02937	carbohydrate kinase [Pectobacterium]
group_2572	BY21311_01392	DPMP315_00405	Tol-Pal system protein TolQ [Pectobacterium]
group_2573	BY21311_02752	DPMP315_03177	hypothetical protein [Pectobacterium]
group_2574	BY21311_02509	DPMP315_02551	cytochrome c nitrite reductase pentaheme subunit [Pectobacterium]
group_2575	BY21311_03182	DPMP315_02180	uracil-DNA glycosylase [Pectobacterium]
group_2576	BY21311_01337	DPMP315_00350	CNNM family magnesium/cobalt transport protein CorC [Pectobacterium]
group_2577	BY21311_03433	DPMP315_00857	tRNA pseudouridine(13) synthase TruD [Pectobacterium]
group_2578	BY21311_00019	DPMP315_01529	ABC transporter substrate-binding protein [Pectobacterium]
group_2579	BY21311_03576	DPMP315_02735	aspartate/tyrosine/aromatic aminotransferase [Pectobacterium]
group_258	BY21311_02632	DPMP315_01290	hypothetical protein
group_2580	BY21311_04377	DPMP315_02999	phosphate ABC transporter ATP-binding protein PstB [Pectobacterium]
group_2581	BY21311_03014	DPMP315_03393	PTS lactose/cellobiose transporter subunit IIA [Pectobacterium]
group_2582	BY21311_02154	DPMP315_01769	L-arabinose ABC transporter ATP-binding protein AraG [Pectobacterium]
group_2583	BY21311_03835	DPMP315_02987	NAD(P)-dependent alcohol dehydrogenase [Pectobacterium]
group_2584	BY21311_02855	DPMP315_03258	hypothetical protein
group_2585	BY21311_00327	DPMP315_03885	p-hydroxybenzoic acid efflux pump operon protein AaeX [Pectobacterium]
group_2586	BY21311_02616	DPMP315_01274	NUDIX hydrolase [Pectobacterium]
group_2587	BY21311_02453	DPMP315_02008	riboflavin synthase subunit alpha [Pectobacterium]
group_2588	BY21311_00343	DPMP315_03901	calcium/sodium antiporter [Pectobacterium]
group_2589	BY21311_00265	DPMP315_03050	hypothetical protein
group_259	BY21311_02645	DPMP315_01303	hypothetical protein
group_2590	BY21311_03797	DPMP315_02949	methionine adenosyltransferase [Pectobacterium]
group_2591	BY21311_02171	DPMP315_00918	hypothetical protein
group_2592	BY21311_01870	DPMP315_02362	APC family permease [Pectobacterium]
group_2593	BY21311_00023	DPMP315_01525	ABC transporter permease [Pectobacterium]
group_2595	BY21311_03102	DPMP315_03481	putative addiction module antidote protein [Pectobacterium]
group_2596	BY21311_01617	DPMP315_02490	GntR family transcriptional regulator [Pectobacterium]
group_2597	BY21311_03356	DPMP315_03842	hypothetical protein [Pectobacterium]
group_2598	BY21311_00890	DPMP315_00524	amino acid ABC transporter ATP-binding protein [Pectobacterium]
group_2599	BY21311_01113	DPMP315_00124	Rho-binding antiterminator [Pectobacterium]
manR_1	BY21311_00392	DPMP315_03950 DPMP315_03949	Transcriptional regulator ManR
group_260	BY21311_02667	DPMP315_03829	hypothetical protein
group_2601	BY21311_01136	DPMP315_00150	alpha/beta fold hydrolase [Pectobacterium]
group_2602	BY21311_03950	DPMP315_02444	YheU family protein [Pectobacterium]
group_2603	BY21311_01858	DPMP315_02374	response regulator [Pectobacterium]
group_2604	BY21311_01038	DPMP315_00053	NADP(H)-dependent aldo-keto reductase [Pectobacterium]
group_2605	BY21311_01551	DPMP315_04268	heme acquisition protein HasA [Pectobacterium]
group_2606	BY21311_03817	DPMP315_02969	tRNA epoxyqueuosine(34) reductase QueG [Pectobacterium]
group_2607	BY21311_02137	DPMP315_01752	YciK family oxidoreductase [Pectobacterium]
group_2608	BY21311_01315	DPMP315_00328	transcription antiterminator/RNA stability regulator CspE [Pectobacterium]
group_2609	BY21311_02633	DPMP315_01291	macrodomain Ter protein MatP [Pectobacterium]
group_261	BY21311_02669	DPMP315_02318	flagellar filament capping protein FliD [Pectobacterium]
group_2610	BY21311_03942	DPMP315_02436	SlyX family protein [Pectobacterium]
group_2611	BY21311_03438	DPMP315_00852	amino acid ABC transporter permease [Pectobacterium]
group_2612	BY21311_04274	DPMP315_00688	glycine--tRNA ligase subunit alpha [Pectobacterium]
group_2613	BY21311_01869	DPMP315_02363	hypothetical protein [Pectobacterium]
group_2614	BY21311_01282	DPMP315_00295	4-hydroxy-tetrahydrodipicolinate synthase [Pectobacterium]
group_2615	BY21311_00224	DPMP315_03080	bifunctional demethylmenaquinone methyltransferase/2-methoxy-6-polyprenyl-1,4-benzoquinol methylase UbiE [Pectobacterium]
group_2616	BY21311_01786	DPMP315_03675	aspartate:alanine antiporter [Pectobacterium]
group_2617	BY21311_02510	DPMP315_02552	ammonia-forming nitrite reductase cytochrome c552 subunit [Pectobacterium]
group_2618	BY21311_03157	DPMP315_03533	transglutaminase-like cysteine peptidase [Pectobacterium]
group_2619	BY21311_03973	DPMP315_01415	nitrite reductase small subunit NirD [Pectobacterium]
group_262	BY21311_02670	DPMP315_02317	flagellar export chaperone FliS [Pectobacterium]
group_2620	BY21311_00646	DPMP315_04402	malate dehydrogenase [Pectobacterium]
group_2621	BY21311_01118	DPMP315_00133	glutathione S-transferase [Pectobacterium]
group_2622	BY21311_01574	DPMP315_04292	LysR family transcriptional regulator [Pectobacterium]
group_2623	BY21311_00028	DPMP315_01520	GNAT family N-acetyltransferase [Pectobacterium]
group_2624	BY21311_00026	DPMP315_01522	XRE family transcriptional regulator [Pectobacterium]
group_2625	BY21311_03542	DPMP315_02701	lysophospholipid transporter LplT [Pectobacterium]
group_2626	BY21311_03892	DPMP315_02386	methionyl-tRNA formyltransferase [Pectobacterium]
group_2627	BY21311_00128	DPMP315_01161	high-affinity branched-chain amino acid ABC transporter permease LivM [Pectobacterium]
group_2628	BY21311_00730	DPMP315_04320	peptide chain release factor 2 [Pectobacterium]
group_2629	BY21311_00691	DPMP315_04359	hypothetical protein
group_263	BY21311_02671	DPMP315_02316	flagella biosynthesis regulatory protein FliT [Pectobacterium]
group_2630	BY21311_01116	DPMP315_00127	envelope stress response activation lipoprotein NlpE [Pectobacterium]
group_2631	BY21311_00648	DPMP315_04400	putative DNA-binding transcriptional regulator [Pectobacterium]
group_2632	BY21311_01951	DPMP315_00968	glucose-6-phosphate dehydrogenase [Pectobacterium]
group_2633	BY21311_03418	DPMP315_03192	CDP-diacylglycerol--serine O-phosphatidyltransferase [Pectobacterium]
group_2634	BY21311_01335	DPMP315_00348	amino acid ABC transporter substrate-binding protein [Pectobacterium]
group_2635	BY21311_02613	DPMP315_01271	universal stress protein [Pectobacterium]
group_2636	BY21311_00346	DPMP315_03904	outer membrane lipid asymmetry maintenance protein MlaD [Pectobacterium]
group_2637	BY21311_02117	DPMP315_01732	cardiolipin synthase [Pectobacterium]
group_2638	BY21311_01788	DPMP315_03673	GrxA family glutaredoxin [Pectobacterium]
group_2639	BY21311_01214	DPMP315_00227	hemolysin expression modulator Hha [Pectobacterium]
group_264	BY21311_02687	DPMP315_02300	flagellar hook-associated protein FlgL [Pectobacterium]
group_2640	BY21311_02037	DPMP315_01653	manganese/iron ABC transporter ATP-binding protein [Pectobacterium]
group_2641	BY21311_01974	DPMP315_01590	GAF domain-containing protein [Pectobacterium]
group_2642	BY21311_02530	DPMP315_02572	AI-2E family transporter YdiK [Pectobacterium]
group_2643	BY21311_03436	DPMP315_00854	cell division protein FtsB [Pectobacterium]
group_2644	BY21311_04311	DPMP315_00651	Ail/Lom family outer membrane beta-barrel protein [Pectobacterium]
group_2645	BY21311_03795	DPMP315_02947	hypothetical protein
group_2646	BY21311_01138	DPMP315_00152	glycosyl hydrolase family 28 protein [Pectobacterium]
group_2647	BY21311_02149	DPMP315_01764	electron transport complex subunit RsxA [Pectobacterium]
group_2648	BY21311_00401	DPMP315_03959	2,5-didehydrogluconate reductase DkgA [Pectobacterium]
group_2649	BY21311_02092	DPMP315_01707	DNA topoisomerase III [Pectobacterium]
group_265	BY21311_02688	DPMP315_02299	flagellar hook-associated protein FlgK [Pectobacterium]
group_2650	BY21311_04076	DPMP315_04051	anaerobic glycerol-3-phosphate dehydrogenase subunit C [Pectobacterium]
group_2651	BY21311_00045	DPMP315_01503	two-component system response regulator DcuR [Pectobacterium]
group_2652	BY21311_02629	DPMP315_01287	TfoX/Sxy family DNA transformation protein [Pectobacterium]
group_2653	BY21311_04212	DPMP315_00745	nucleoid occlusion factor SlmA [Pectobacterium]
group_2654	BY21311_01984	DPMP315_01600	cupin domain-containing protein [Pectobacterium]
group_2655	BY21311_01190	DPMP315_00203	cytochrome o ubiquinol oxidase subunit I [Pectobacterium]
group_2656	BY21311_01665	DPMP315_03806	AraC family transcriptional regulator [Pectobacterium]
group_2657	BY21311_00170	DPMP315_01122	ribonuclease E activity regulator RraA [Pectobacterium]
group_2658	BY21311_03459	DPMP315_00831	hypothetical protein
group_2659	BY21311_03583	DPMP315_02738	excinuclease ABC subunit UvrA [Pectobacterium]
group_266	BY21311_02695	DPMP315_02292	flagellar hook assembly protein FlgD [Pectobacterium]
group_2660	BY21311_00415	DPMP315_03973	YiiG family protein [Pectobacterium]
group_2661	BY21311_03645	DPMP315_02798	PTS sugar transporter subunit IIB [Pectobacterium]
group_2662	BY21311_01059	DPMP315_00071	amino-acid N-acetyltransferase [Pectobacterium]
group_2663	BY21311_02891	DPMP315_03294	hypothetical protein
group_2664	BY21311_01839	DPMP315_03629	formate transporter FocA [Pectobacterium]
group_2665	BY21311_02541	DPMP315_01203	EAL domain-containing protein [Pectobacterium]
group_2666	BY21311_02598	DPMP315_01258	cytochrome b [Pectobacterium]
group_2667	BY21311_03048	DPMP315_03427	helix-turn-helix domain-containing protein [Pectobacterium]
group_2668	BY21311_01512	DPMP315_04230	ABC transporter substrate-binding protein [Pectobacterium]
group_2669	BY21311_01681	DPMP315_03790	ABC transporter substrate-binding protein [Pectobacterium]
group_267	BY21311_02720	DPMP315_03169	tyrosine-type recombinase/integrase [Pectobacterium]
group_2670	BY21311_01904	DPMP315_02328	intermembrane transport protein PqiB [Pectobacterium]
group_2671	BY21311_02167	DPMP315_00922	LysR family transcriptional regulator [Pectobacterium]
group_2672	BY21311_00829	DPMP315_02574	NADP-dependent oxaloacetate-decarboxylating malate dehydrogenase [Pectobacterium]
group_2673	BY21311_03626	DPMP315_02780	sodium:solute symporter family protein [Pectobacterium]
group_2674	BY21311_00657	DPMP315_04391	ribosome assembly RNA-binding protein YhbY [Pectobacterium]
group_2675	BY21311_02439	DPMP315_01995	pyridoxamine 5'-phosphate oxidase [Pectobacterium]
group_2676	BY21311_00741	DPMP315_02633	Na+/H+ antiporter [Pectobacterium]
group_2677	BY21311_00153	DPMP315_01139	hypothetical protein [Pectobacterium]
group_2678	BY21311_01778	DPMP315_03683	PQQ-dependent sugar dehydrogenase [Pectobacterium]
group_2679	BY21311_01166	DPMP315_00179	hypothetical protein
group_268	BY21311_02721	DPMP315_02264	antitoxin [Pectobacterium]
group_2680	BY21311_00249	DPMP315_03034	bifunctional biotin--[acetyl-CoA-carboxylase] ligase/biotin operon repressor BirA [Pectobacterium]
group_2681	BY21311_03326	DPMP315_01389	Hcp family type VI secretion system effector [Pectobacterium]
group_2682	BY21311_01776	DPMP315_03685	hypothetical protein [Pectobacterium]
group_2683	BY21311_02245	DPMP315_01795	M20 peptidase aminoacylase family protein [Pectobacterium]
group_2684	BY21311_00833	DPMP315_00467	YaiI/YqxD family protein [Pectobacterium]
group_2685	BY21311_01066	DPMP315_00078	TetR family transcriptional regulator [Pectobacterium]
group_2686	BY21311_03600	DPMP315_02754	metal ABC transporter permease [Pectobacterium]
group_2687	BY21311_03983	DPMP315_01425	adenine-specific DNA-methyltransferase [Pectobacterium]
group_2688	BY21311_02423	DPMP315_01979	ABC transporter permease [Pectobacterium]
group_2689	BY21311_03046	DPMP315_03425	YjfB family protein [Pectobacterium]
group_269	BY21311_02726	DPMP315_02259	hypothetical protein [Pectobacterium]
group_2690	BY21311_01584	DPMP315_04302	TonB-dependent siderophore receptor [Pectobacterium]
group_2691	BY21311_04204	DPMP315_03593	pantetheine-phosphate adenylyltransferase [Pectobacterium]
group_2692	BY21311_00357	DPMP315_03915	stringent starvation protein A [Pectobacterium]
group_2693	BY21311_02644	DPMP315_01302	phosphate starvation-inducible protein PhoH [Pectobacterium]
group_2694	BY21311_02596	DPMP315_01256	hypothetical protein [Pectobacterium]
group_2695	BY21311_03490	DPMP315_00799	SH3 domain-containing protein [Pectobacterium]
group_2696	BY21311_01227	DPMP315_00240	recombination mediator RecR [Pectobacterium]
group_2697	BY21311_01532	DPMP315_04249	DMT family transporter [Pectobacterium]
group_2698	BY21311_01090	DPMP315_00102	2,3,4,5-tetrahydropyridine-2,6-dicarboxylate N-succinyltransferase [Pectobacterium]
group_2699	BY21311_03903	DPMP315_02397	preprotein translocase subunit SecY [Pectobacterium]
group_27	BY21311_00443 BY21311_00444	DPMP315_04005	hypothetical protein
group_270	BY21311_02727	DPMP315_02258	hypothetical protein [Pectobacterium]
group_2700	BY21311_03680	DPMP315_02834	cell division protein FtsA [Pectobacterium]
group_2701	BY21311_02419	DPMP315_01975	sugar phosphate isomerase/epimerase [Pectobacterium]
group_2702	BY21311_01504	DPMP315_04222	oxidoreductase [Pectobacterium]
group_2703	BY21311_01519	DPMP315_04237	amino acid racemase [Pectobacterium]
group_2704	BY21311_03198	DPMP315_02197	sulfate ABC transporter substrate-binding protein [Pectobacterium]
group_2705	BY21311_03141	DPMP315_03519	3-phenylpropionate MFS transporter [Pectobacterium]
group_2706	BY21311_00822	DPMP315_02581	RpiB/LacA/LacB family sugar-phosphate isomerase [Pectobacterium]
group_2707	BY21311_01884	DPMP315_02348	envelope biogenesis factor ElyC [Pectobacterium]
group_2708	BY21311_04223	DPMP315_00734	isoaspartyl peptidase/L-asparaginase [Pectobacterium]
group_2709	BY21311_01686	DPMP315_03785	LysE family translocator [Pectobacterium]
group_271	BY21311_02732	DPMP315_02252	inovirus-type Gp2 protein [Pectobacterium]
group_2710	BY21311_01735	DPMP315_03725	nucleoid-associated protein YejK [Pectobacterium]
group_2711	BY21311_01161	DPMP315_00174	cobalamin-independent methionine synthase II family protein [Pectobacterium]
group_2712	BY21311_00476	DPMP315_01002	GNAT family N-acetyltransferase [Pectobacterium]
group_2713	BY21311_04065	DPMP315_04041	heparinase II/III family protein [Pectobacterium]
group_2714	BY21311_01388	DPMP315_00401	cytochrome d ubiquinol oxidase subunit II [Pectobacterium]
group_2715	BY21311_02295	DPMP315_01849	EscD/YscD/HrpQ family type III secretion system inner membrane ring protein [Pectobacterium]
group_2716	BY21311_00533	DPMP315_01061	Xaa-Pro aminopeptidase [Pectobacterium]
group_2717	BY21311_01496	DPMP315_04214	sensor domain-containing diguanylate cyclase [Pectobacterium]
group_2718	BY21311_00746	DPMP315_02638	Flp pilus assembly protein CpaB [Pectobacterium]
group_2719	BY21311_02484	DPMP315_02526	LysR family transcriptional regulator [Pectobacterium]
group_272	BY21311_02734	DPMP315_02249	hypothetical protein [Pectobacterium]
group_2720	BY21311_00725	DPMP315_04325	MHS family MFS transporter [Pectobacterium]
group_2721	BY21311_01897	DPMP315_02335	aminopeptidase N [Pectobacterium]
group_2722	BY21311_03452	DPMP315_00838	glycosyl hydrolase family 28 protein [Pectobacterium]
group_2723	BY21311_04366	DPMP315_03010	F0F1 ATP synthase subunit alpha [Pectobacterium]
group_2724	BY21311_02694	DPMP315_02293	flagellar hook protein FlgE [Pectobacterium]
group_2725	BY21311_03060	DPMP315_03440	sugar ABC transporter permease [Pectobacterium]
group_2726	BY21311_03440	DPMP315_00850	hypothetical protein
group_2727	BY21311_02546	DPMP315_01208	glutathione peroxidase [Pectobacterium]
group_2728	BY21311_01293	DPMP315_00306	FecR family protein [Pectobacterium]
group_2729	BY21311_02607	DPMP315_01266	PepSY domain-containing protein [Pectobacterium]
group_273	BY21311_02737	DPMP315_02246	HNH endonuclease [Pectobacterium]
group_2730	BY21311_03770	DPMP315_02923	zinc-binding alcohol dehydrogenase family protein [Pectobacterium]
group_2731	BY21311_02003	DPMP315_01619	protease HtpX [Pectobacterium]
group_2732	BY21311_03695	DPMP315_02849	L-alanine exporter AlaE [Pectobacterium]
group_2733	BY21311_04181	DPMP315_04157	serine O-acetyltransferase [Pectobacterium]
group_2734	BY21311_01152	DPMP315_00166	methyl-accepting chemotaxis protein [Pectobacterium]
group_2735	BY21311_01539	DPMP315_04256	ABC transporter ATP-binding protein [Pectobacterium]
group_2736	BY21311_01608	DPMP315_02498	DgsA anti-repressor MtfA [Pectobacterium]
group_2737	BY21311_01140	DPMP315_00154	type I secretion system permease/ATPase [Pectobacterium]
group_2738	BY21311_02925	DPMP315_03328	phosphohistidine phosphatase SixA [Pectobacterium]
group_2739	BY21311_00513	DPMP315_01039	ABC transporter ATP-binding protein [Pectobacterium]
group_274	BY21311_02763	DPMP315_04026	AlpA family transcriptional regulator [Pectobacterium]
group_2740	BY21311_04400	DPMP315_01564	GGDEF domain-containing protein [Pectobacterium]
group_2741	BY21311_04359	DPMP315_03017	tRNA uridine-5-carboxymethylaminomethyl(34) synthesis enzyme MnmG [Pectobacterium]
group_2742	BY21311_04101	DPMP315_04076	uroporphyrinogen-III synthase [Pectobacterium]
group_2743	BY21311_03207	DPMP315_02206	glutathione S-transferase [Pectobacterium]
group_2744	BY21311_00630	DPMP315_04416	carbohydrate porin [Pectobacterium]
group_2745	BY21311_00748	DPMP315_02640	CpaD family pilus assembly protein [Pectobacterium]
group_2746	BY21311_04165	DPMP315_04141	hypothetical protein
group_2747	BY21311_00478	DPMP315_01004	alpha/beta hydrolase [Pectobacterium]
group_2748	BY21311_01947	DPMP315_00964	murein DD-endopeptidase MepM [Pectobacterium]
group_2749	BY21311_00529	DPMP315_01057	APC family permease [Pectobacterium]
group_275	BY21311_02798	DPMP315_03213	translation elongation factor 4 [Pectobacterium]
group_2750	BY21311_03411	DPMP315_03199	multidrug efflux MFS transporter permease subunit EmrB [Pectobacterium]
group_2751	BY21311_01958	DPMP315_00974	non-heme ferritin [Pectobacterium]
group_2752	BY21311_04256	DPMP315_00705	XylR family transcriptional regulator [Pectobacterium]
group_2753	BY21311_01862	DPMP315_02370	[citrate (pro-3S)-lyase] ligase [Pectobacterium]
group_2754	BY21311_03726	DPMP315_02879	4-hydroxythreonine-4-phosphate dehydrogenase PdxA [Pectobacterium]
group_2755	BY21311_01289	DPMP315_00302	metallopeptidase TldD-related protein [Pectobacterium]
group_2756	BY21311_04336	DPMP315_00627	DNA polymerase I [Pectobacterium]
group_2757	BY21311_00488	DPMP315_01013	PLP-dependent cysteine synthase family protein [Pectobacterium]
group_2758	BY21311_03537	DPMP315_00755	radical SAM family heme chaperone HemW [Pectobacterium]
group_2759	BY21311_03842	DPMP315_02994	decarboxylase [Pectobacterium]
group_276	BY21311_02799	DPMP315_03212	SulP family inorganic anion transporter [Pectobacterium]
group_2760	BY21311_02377	DPMP315_01933	peptide ABC transporter substrate-binding protein [Pectobacterium]
group_2761	BY21311_01678	DPMP315_03793	DeoR/GlpR family DNA-binding transcription regulator [Pectobacterium]
group_2762	BY21311_00121	DPMP315_01168	signal recognition particle-docking protein FtsY [Pectobacterium]
group_2763	BY21311_00563	DPMP315_01091	efflux RND transporter periplasmic adaptor subunit [Pectobacterium]
group_2764	BY21311_03277	DPMP315_01342	nicotinamide-nucleotide amidase [Pectobacterium]
group_2765	BY21311_01075	DPMP315_00087	cysteine desulfurase CsdA [Pectobacterium]
group_2766	BY21311_02199	DPMP315_00889	SDR family NAD(P)-dependent oxidoreductase [Pectobacterium]
group_2767	BY21311_00408	DPMP315_03966	carotenoid oxygenase family protein [Pectobacterium]
group_2768	BY21311_04035	DPMP315_01476	ribokinase [Pectobacterium]
group_2769	BY21311_01969	DPMP315_01585	sel1 repeat family protein [Pectobacterium]
group_277	BY21311_02807	DPMP315_03111	alpha/beta fold hydrolase [Pectobacterium]
group_2770	BY21311_00420	DPMP315_03978	aminoimidazole riboside kinase [Pectobacterium]
group_2771	BY21311_01765	DPMP315_03696	oxidoreductase [Pectobacterium]
group_2772	BY21311_02042	DPMP315_01658	hypothetical protein
group_2773	BY21311_02322	DPMP315_01878	PLP-dependent aminotransferase family protein [Pectobacterium]
group_2774	BY21311_03110	DPMP315_03489	ribosome biogenesis GTPase Der [Pectobacterium]
group_2775	BY21311_03949	DPMP315_02443	hydrolase [Pectobacterium]
group_2776	BY21311_03992	DPMP315_01433	pilus assembly protein PilM [Pectobacterium]
group_2777	BY21311_01410	DPMP315_00423	efflux RND transporter permease subunit [Pectobacterium]
group_2778	BY21311_03937	DPMP315_02431	two-component system sensor histidine kinase PmrB [Pectobacterium]
group_2779	BY21311_04071	DPMP315_04047	glycoside hydrolase family 88 protein [Pectobacterium]
group_278	BY21311_02810	DPMP315_03114	efflux RND transporter periplasmic adaptor subunit [Pectobacterium]
group_2780	BY21311_01851	DPMP315_03617	histidinol-phosphate transaminase [Pectobacterium]
group_2781	BY21311_03780	DPMP315_02933	SMP-30/gluconolactonase/LRE family protein [Pectobacterium]
group_2782	BY21311_02142	DPMP315_01757	dipeptide/tripeptide permease DtpA [Pectobacterium]
group_2783	BY21311_00195	DPMP315_01097	YijD family membrane protein [Pectobacterium]
group_2784	BY21311_00894	DPMP315_00528	IclR family transcriptional regulator [Pectobacterium]
group_2785	BY21311_04015	DPMP315_01456	2-keto-3-deoxygluconate transporter [Pectobacterium]
group_2786	BY21311_01874	DPMP315_02358	iron chelate uptake ABC transporter family permease subunit [Pectobacterium]
group_2787	BY21311_00021	DPMP315_01527	nucleoside hydrolase [Pectobacterium]
group_2788	BY21311_00807	DPMP315_02596	Nramp family divalent metal transporter [Pectobacterium]
group_2789	BY21311_01676	DPMP315_03795	D-alanyl-D-alanine endopeptidase [Pectobacterium]
group_279	BY21311_02812	DPMP315_03116	response regulator [Pectobacterium]
group_2790	BY21311_01569	DPMP315_04287	Rpn family recombination-promoting nuclease/putative transposase [Pectobacterium]
group_2791	BY21311_00203	DPMP315_03101	ABC transporter substrate-binding protein [Pectobacterium]
group_2792	BY21311_04338	DPMP315_00625	serine/threonine protein kinase [Pectobacterium]
group_2793	BY21311_00486	DPMP315_01011	hypothetical protein [Pectobacterium]
group_2794	BY21311_03728	DPMP315_02881	Co2+/Mg2+ efflux protein ApaG [Pectobacterium]
group_2795	BY21311_04258	DPMP315_00703	xylose ABC transporter ATP-binding protein [Pectobacterium]
group_2796	BY21311_01022	DPMP315_00037	ornithine decarboxylase [Pectobacterium]
group_2797	BY21311_01699	DPMP315_03772	hypothetical protein [Pectobacterium]
group_2798	BY21311_04270	DPMP315_00691	PTS mannitol transporter subunit IICBA [Pectobacterium]
group_2799	BY21311_03089	DPMP315_03468	LysR family transcriptional regulator [Pectobacterium]
group_28	BY21311_00494	DPMP315_01022 DPMP315_01019	RNA repair transcriptional activator RtcR [Pectobacterium]
group_280	BY21311_02820	DPMP315_03124	hypothetical protein
group_2800	BY21311_00679	DPMP315_04371	SCP2 domain-containing protein [Pectobacterium]
group_2801	BY21311_03876	DPMP315_02693	phosphatidate cytidylyltransferase [Pectobacterium]
group_2802	BY21311_01230	DPMP315_00243	ferrochelatase [Pectobacterium]
group_2803	BY21311_00112	DPMP315_01177	MFS transporter [Pectobacterium]
group_2804	BY21311_01553	DPMP315_04270	FecR domain-containing protein [Pectobacterium]
group_2805	BY21311_03954	DPMP315_02448	aspartate aminotransferase family protein [Pectobacterium]
group_2806	BY21311_00755	DPMP315_02647	hypothetical protein [Pectobacterium]
group_2807	BY21311_03719	DPMP315_02872	sensor domain-containing diguanylate cyclase [Pectobacterium]
group_2808	BY21311_03009	DPMP315_03388	DltD [Pectobacterium]
group_2809	BY21311_00590	DPMP315_04453	aspartate ammonia-lyase [Pectobacterium]
odh	BY21311_02839	DPMP315_03242	Opine dehydrogenase
group_2810	BY21311_02514	DPMP315_02556	carbohydrate porin [Pectobacterium]
group_2811	BY21311_00032	DPMP315_01516	FMNH2-dependent alkanesulfonate monooxygenase [Pectobacterium]
group_2812	BY21311_04149	DPMP315_04126	ABC transporter permease [Pectobacterium]
group_2813	BY21311_03723	DPMP315_02876	co-chaperone DjlA [Pectobacterium]
group_2814	BY21311_04092	DPMP315_04067	5-amino-6-(5-phospho-D-ribitylamino)uracil phosphatase YigB [Pectobacterium]
group_2815	BY21311_02076	DPMP315_01691	6-phosphofructokinase [Pectobacterium]
group_2816	BY21311_03747	DPMP315_02900	Na+/H+ antiporter NhaA [Pectobacterium]
group_2817	BY21311_02262	DPMP315_01816	allophanate hydrolase [Pectobacterium]
group_2818	BY21311_02889	DPMP315_03292	sugar phosphatase [Pectobacterium]
group_2819	BY21311_00393	DPMP315_03951	TonB-dependent receptor [Pectobacterium]
group_282	BY21311_02841	DPMP315_03244	Rpn family recombination-promoting nuclease/putative transposase [Pectobacterium]
group_2820	BY21311_00220	DPMP315_03084	N-acetyl-gamma-glutamyl-phosphate reductase [Pectobacterium]
group_2821	BY21311_04333	DPMP315_00630	oxygen-independent coproporphyrinogen III oxidase [Pectobacterium]
group_2822	BY21311_00702	DPMP315_04348	acetolactate decarboxylase [Pectobacterium]
group_2823	BY21311_03554	DPMP315_02714	glycerate kinase [Pectobacterium]
group_2824	BY21311_00132	DPMP315_01157	methyl-accepting chemotaxis protein [Pectobacterium]
group_2825	BY21311_00483	DPMP315_01009	aspartate ammonia-lyase [Pectobacterium]
group_2826	BY21311_04192	DPMP315_04168	O-antigen ligase family protein [Pectobacterium]
group_2827	BY21311_01953	DPMP315_00969	bifunctional 4-hydroxy-2-oxoglutarate aldolase/2-dehydro-3-deoxy-phosphogluconate aldolase [Pectobacterium]
group_2828	BY21311_02078	DPMP315_01693	multidrug effflux MFS transporter [Pectobacterium]
group_2829	BY21311_03739	DPMP315_02892	4-hydroxy-tetrahydrodipicolinate reductase [Pectobacterium]
group_283	BY21311_02849	DPMP315_03252	tail fiber protein [Pectobacterium]
group_2830	BY21311_00197	DPMP315_01095	TonB-dependent vitamin B12 receptor BtuB [Pectobacterium]
group_2831	BY21311_00403	DPMP315_03961	NADPH-dependent oxidoreductase [Pectobacterium]
group_2832	BY21311_03662	DPMP315_02816	amino acid permease [Pectobacterium]
group_2833	BY21311_02251	DPMP315_01801	amino acid ABC transporter permease [Pectobacterium]
group_2834	BY21311_04017	DPMP315_01458	carbapenem biosynthesis protein CpmH [Pectobacterium]
group_2835	BY21311_01724	DPMP315_03748	MFS transporter [Pectobacterium]
group_2836	BY21311_02955	DPMP315_03358	A24 family peptidase [Pectobacterium]
group_2837	BY21311_00707	DPMP315_04343	aminomethyl-transferring glycine dehydrogenase [Pectobacterium]
group_2838	BY21311_00805	DPMP315_02598	NAD(+) kinase [Pectobacterium]
group_2839	BY21311_00184	DPMP315_01108	bifunctional aspartate kinase/homoserine dehydrogenase II [Pectobacterium]
cydX_2	BY21311_02853	DPMP315_03256	Cytochrome bd-I ubiquinol oxidase subunit X
group_2840	BY21311_03878	DPMP315_02695	isocitrate lyase [Pectobacterium]
group_2841	BY21311_01642	DPMP315_02465	GTP 3',8-cyclase MoaA [Pectobacterium]
group_2843	BY21311_02675	DPMP315_02312	flagellar assembly protein FliH [Pectobacterium]
group_2844	BY21311_00276	DPMP315_03061	uroporphyrinogen decarboxylase [Pectobacterium]
group_2845	BY21311_03384	DPMP315_02143	amino acid ABC transporter ATP-binding protein [Pectobacterium]
group_2846	BY21311_02543	DPMP315_01205	lipoate--protein ligase A [Pectobacterium]
group_2847	BY21311_02232	DPMP315_01784	zinc metallochaperone GTPase ZigA [Pectobacterium]
group_2848	BY21311_02008	DPMP315_01624	threonine--tRNA ligase [Pectobacterium]
group_2849	BY21311_01296	DPMP315_00309	ABC transporter ATP-binding protein/permease [Pectobacterium]
group_285	BY21311_02861	DPMP315_03264	heme utilization cystosolic carrier protein HutX [Pectobacterium]
group_2850	BY21311_01792	DPMP315_03668	spermidine/putrescine ABC transporter substrate-binding protein PotF [Pectobacterium]
group_2851	BY21311_02495	DPMP315_02537	c-type cytochrome biogenesis protein CcmI [Pectobacterium]
group_2852	BY21311_02020	DPMP315_01636	L-cystine transporter [Pectobacterium]
group_2853	BY21311_03612	DPMP315_02766	phosphoribosyltransferase domain-containing protein [Pectobacterium]
group_2854	BY21311_01107	DPMP315_00118	lipid-A-disaccharide synthase [Pectobacterium]
group_2855	BY21311_00174	DPMP315_01118	cell division protein FtsN [Pectobacterium]
group_2856	BY21311_03179	DPMP315_02177	tRNA1(Val) (adenine(37)-N6)-methyltransferase [Pectobacterium]
group_2857	BY21311_00450	DPMP315_04011	alpha/beta fold hydrolase [Pectobacterium]
group_2858	BY21311_04067	DPMP315_04043	Cof-type HAD-IIB family hydrolase [Pectobacterium]
group_2859	BY21311_02964	DPMP315_03367	type II secretion system inner membrane protein GspF [Pectobacterium]
group_286	BY21311_02926	DPMP315_03329	hypothetical protein
group_2860	BY21311_02685	DPMP315_02302	flagellar type III secretion system protein FliR [Pectobacterium]
[truncated: 1,918 more rows]

## Sheet: BY21311 specific
Ortholog Group	BY21311	DPMP315T	Annotation
group_2842	BY21311_00012 BY21311_01439 BY21311_01597 BY21311_01738 BY21311_02065 BY21311_03066 BY21311_03596		IS110 family transposase [Pectobacterium]
rhsB	BY21311_00056		putative deoxyribonuclease RhsB
group_367	BY21311_00057		hypothetical protein
group_368	BY21311_00058		hypothetical protein
group_71	BY21311_00059 BY21311_00072		hypothetical protein
group_369	BY21311_00061		hypothetical protein
group_370	BY21311_00062		hypothetical protein
group_371	BY21311_00064		hypothetical protein
group_372	BY21311_00067		hypothetical protein
group_373	BY21311_00083		hypothetical protein [Pectobacterium]
group_374	BY21311_00088		hypothetical protein [Pectobacterium]
group_375	BY21311_00095		hypothetical protein
group_376	BY21311_00142		helix-turn-helix domain-containing protein [Pectobacterium]
group_377	BY21311_00143		hypothetical protein
group_378	BY21311_00144		hypothetical protein
parE1	BY21311_00145		Toxin ParE1
group_380	BY21311_00146		type II toxin-antitoxin system ParD family antitoxin [Pectobacterium]
group_381	BY21311_00238		amino acid ABC transporter permease [Pectobacterium]
group_382	BY21311_00239		amino acid ABC transporter substrate-binding protein [Pectobacterium]
group_383	BY21311_00240		glutathione S-transferase family protein [Pectobacterium]
group_384	BY21311_00423		hypothetical protein
group_385	BY21311_00461		hypothetical protein
group_386	BY21311_00462		hypothetical protein
group_387	BY21311_00463		hypothetical protein
group_388	BY21311_00466		hypothetical protein
group_389	BY21311_00467		hypothetical protein
era_1	BY21311_00468		GTPase Era
era_2	BY21311_00469		GTPase Era
group_102	BY21311_00470 BY21311_03345		hypothetical protein
group_392	BY21311_00471		hypothetical protein
group_393	BY21311_00485		hypothetical protein [Pectobacterium]
group_394	BY21311_00498		hypothetical protein
group_395	BY21311_00499		type II toxin-antitoxin system RelE/ParE family toxin [Pectobacterium]
group_396	BY21311_00522		hypothetical protein
group_397	BY21311_00564		hypothetical protein
group_398	BY21311_00565		hypothetical protein
group_114	BY21311_00568 BY21311_02652		IS3 family transposase [Pectobacterium]
hin	BY21311_00569		DNA-invertase hin
group_400	BY21311_00570		hypothetical protein
group_401	BY21311_00571		hypothetical protein
group_402	BY21311_00572		hypothetical protein
group_403	BY21311_00575		hypothetical protein
group_404	BY21311_00577		hypothetical protein
group_405	BY21311_00578		hypothetical protein
group_406	BY21311_00579		hypothetical protein
group_407	BY21311_00594		hypothetical protein
group_408	BY21311_00595		hypothetical protein
group_409	BY21311_00632		hypothetical protein
group_410	BY21311_00634		hypothetical protein
group_411	BY21311_00664		hypothetical protein
group_412	BY21311_00708		LysE family transporter [Pectobacterium]
group_413	BY21311_00709		hypothetical protein
group_3042	BY21311_00768 BY21311_00830 BY21311_02532 BY21311_03965 BY21311_04074 BY21311_04390		IS110 family transposase [Pectobacterium]
group_414	BY21311_00788		GNAT family N-acetyltransferase [Pectobacterium]
group_415	BY21311_00789		hypothetical protein
group_416	BY21311_00792		type II toxin-antitoxin system RelE/ParE family toxin [Pectobacterium]
group_417	BY21311_00794		hypothetical protein
group_418	BY21311_00795		hypothetical protein
group_419	BY21311_00796		hypothetical protein
group_420	BY21311_00797		hypothetical protein
group_421	BY21311_00875		zinc-binding alcohol dehydrogenase family protein [Pectobacterium]
group_422	BY21311_00876		MHS family MFS transporter [Pectobacterium]
group_423	BY21311_00925		ParB family protein [Pectobacterium]
traR_1	BY21311_00926		Protein TraR
group_425	BY21311_00927		hypothetical protein
group_426	BY21311_00928		hypothetical protein
group_427	BY21311_00931		hypothetical protein
group_428	BY21311_00932		hypothetical protein
group_429	BY21311_00934		TIGR03761 family integrating conjugative element protein [Pectobacterium]
group_430	BY21311_00939		hypothetical protein
group_431	BY21311_00940		PilN family type IVB pilus formation outer membrane protein [Pectobacterium]
group_432	BY21311_00941		type 4b pilus protein PilO2 [Pectobacterium]
group_433	BY21311_00942		hypothetical protein
group_434	BY21311_00943		Flp pilus assembly complex ATPase component TadA [Pectobacterium]
group_435	BY21311_00944		type II secretion system F family protein [Pectobacterium]
group_436	BY21311_00945		hypothetical protein
group_437	BY21311_00947		hypothetical protein
group_438	BY21311_00951		hypothetical protein [Pectobacterium]
group_439	BY21311_00954		integrating conjugative element protein [Pectobacterium]
group_440	BY21311_00955		hypothetical protein
group_441	BY21311_00958		hypothetical protein
group_442	BY21311_00960		TIGR03758 family integrating conjugative element protein [Pectobacterium]
group_443	BY21311_00962		TIGR03750 family conjugal transfer protein [Pectobacterium]
group_444	BY21311_00966		hypothetical protein
group_445	BY21311_00967		hypothetical protein [Pectobacterium]
group_446	BY21311_00970		acetyltransferase [Pectobacterium]
group_447	BY21311_00971		hypothetical protein
group_448	BY21311_00972		hypothetical protein
group_449	BY21311_00973		hypothetical protein
group_450	BY21311_00974		hypothetical protein
group_451	BY21311_00975		hypothetical protein
group_452	BY21311_00976		TIGR03757 family integrating conjugative element protein [Pectobacterium]
group_453	BY21311_00979		hypothetical protein
group_454	BY21311_00980		hypothetical protein
group_455	BY21311_00981		hypothetical protein
pinR	BY21311_00982		Serine recombinase PinR
group_457	BY21311_00994		hypothetical protein
group_458	BY21311_00995		hypothetical protein
group_459	BY21311_00997		hypothetical protein
group_460	BY21311_00998		hypothetical protein [Pectobacterium]
group_461	BY21311_01001		hypothetical protein
group_462	BY21311_01009		hypothetical protein
group_463	BY21311_01010		hypothetical protein
group_464	BY21311_01011		hypothetical protein
group_465	BY21311_01012		hypothetical protein
group_466	BY21311_01014		hypothetical protein
group_467	BY21311_01015		hypothetical protein
group_468	BY21311_01017		hypothetical protein
group_469	BY21311_01018		hypothetical protein
group_470	BY21311_01019		TraI domain-containing protein [Pectobacterium]
group_471	BY21311_01057		hypothetical protein
group_472	BY21311_01129		hypothetical protein
group_473	BY21311_01157		hypothetical protein
fdtA	BY21311_01451		TDP-4-oxo-6-deoxy-alpha-D-glucose-3,4-oxoisomerase
group_475	BY21311_01452		hypothetical protein
group_476	BY21311_01453		UDP-4-amino-4-deoxy-L-arabinose aminotransferase [Pectobacterium]
group_477	BY21311_01454		lipid III flippase WzxE [Pectobacterium]
group_478	BY21311_01455		hypothetical protein
group_479	BY21311_01456		hypothetical protein
group_480	BY21311_01457		hypothetical protein
wfgD	BY21311_01458		UDP-Glc:alpha-D-GlcNAc-diphosphoundecaprenol beta-1,3-glucosyltransferase WfgD
gnu	BY21311_01459		N-acetyl-alpha-D-glucosaminyl-diphospho-ditrans,octacis-undecaprenol 4-epimerase
group_483	BY21311_01479		hypothetical protein
group_484	BY21311_01594		PLP-dependent aminotransferase family protein [Pectobacterium]
group_485	BY21311_01595		hypothetical protein
group_486	BY21311_01596		hypothetical protein
group_487	BY21311_01599		hypothetical protein
group_488	BY21311_01600		O-acetyl-L-homoserine sulfhydrylase
thrB	BY21311_01601		Homoserine kinase
ddaF_1	BY21311_01602		Dapdiamide A synthase
group_491	BY21311_01603		hypothetical protein
group_492	BY21311_01604		hypothetical protein
group_493	BY21311_01605		hypothetical protein
group_494	BY21311_01612		hypothetical protein
group_495	BY21311_01649		MacB family efflux pump subunit [Pectobacterium]
group_496	BY21311_01650		efflux RND transporter periplasmic adaptor subunit [Pectobacterium]
group_497	BY21311_01651		hypothetical protein
group_498	BY21311_01723		hypothetical protein
ddaF_2	BY21311_01798		Dapdiamide A synthase
group_500	BY21311_01799		hypothetical protein
group_501	BY21311_01800		hypothetical protein
group_502	BY21311_01801		hypothetical protein
novN	BY21311_01802		Decarbamoylnovobiocin carbamoyltransferase
group_504	BY21311_01803		hypothetical protein
group_505	BY21311_01826		hypothetical protein
group_506	BY21311_01854		hypothetical protein
group_507	BY21311_01908		hypothetical protein
group_508	BY21311_01909		hypothetical protein
group_509	BY21311_01910		ribose operon transcriptional repressor RbsR [Pectobacterium]
group_510	BY21311_01911		hypothetical protein
group_511	BY21311_01926		hypothetical protein
group_512	BY21311_01927		cytosine permease [Pectobacterium]
group_513	BY21311_01952		hypothetical protein
group_514	BY21311_01960		hypothetical protein
group_515	BY21311_01962		hypothetical protein
group_516	BY21311_01963		hypothetical protein
group_517	BY21311_02063		hypothetical protein
group_518	BY21311_02205		hypothetical protein
pth	BY21311_02222		Peptidyl-tRNA hydrolase
ychF	BY21311_02223		Ribosome-binding ATPase YchF
group_521	BY21311_02239		oxidoreductase [Pectobacterium]
group_522	BY21311_02240		helix-turn-helix transcriptional regulator [Pectobacterium]
group_523	BY21311_02241		glutathione-regulated potassium-efflux system ancillary protein KefG [Pectobacterium]
group_524	BY21311_02243		hypothetical protein
group_525	BY21311_02253		hypothetical protein
group_526	BY21311_02254		hypothetical protein
group_527	BY21311_02276		hypothetical protein [Pectobacterium]
group_528	BY21311_02427		hypothetical protein
group_529	BY21311_02461		aspartate/glutamate racemase family protein [Pectobacterium]
group_530	BY21311_02462		4-oxalocrotonate tautomerase family protein [Pectobacterium]
group_531	BY21311_02464		AEC family transporter [Pectobacterium]
group_532	BY21311_02465		family 1 glycosylhydrolase [Pectobacterium]
group_533	BY21311_02466		PTS beta-glucoside transporter subunit IIABC [Pectobacterium]
group_534	BY21311_02468		transcriptional antiterminator BglG [Pectobacterium]
group_535	BY21311_02469		urea carboxylase [Pectobacterium]
group_536	BY21311_02470		hypothetical protein
group_537	BY21311_02471		hypothetical protein
group_538	BY21311_02472		hypothetical protein
group_539	BY21311_02473		ABC transporter ATP-binding protein [Pectobacterium]
group_540	BY21311_02474		ABC transporter permease [Pectobacterium]
group_541	BY21311_02475		hypothetical protein
group_542	BY21311_02611		GhoT/OrtT family toxin [Pectobacterium]
group_543	BY21311_02650		hypothetical protein
group_544	BY21311_02651		hypothetical protein
group_545	BY21311_02653		hypothetical protein
group_546	BY21311_02654		hypothetical protein
group_547	BY21311_02655		hypothetical protein
group_548	BY21311_02656		hypothetical protein
group_549	BY21311_02657		long-chain-fatty-acid--CoA ligase FadD [Pectobacterium]
group_550	BY21311_02658		transketolase family protein [Pectobacterium]
group_551	BY21311_02659		transketolase [Pectobacterium]
group_552	BY21311_02660		3-oxoacyl-ACP reductase FabG [Pectobacterium]
group_553	BY21311_02661		3-oxoacyl-ACP reductase FabG [Pectobacterium]
group_554	BY21311_02662		hypothetical protein
group_555	BY21311_02663		hypothetical protein
perB	BY21311_02664		GDP-perosamine N-acetyltransferase
group_557	BY21311_02665		UDP-4-amino-4-deoxy-L-arabinose aminotransferase [Pectobacterium]
group_558	BY21311_02666		hypothetical protein
group_559	BY21311_02731		hypothetical protein
group_560	BY21311_02738		hypothetical protein
group_561	BY21311_02739		hypothetical protein
group_562	BY21311_02740		hypothetical protein
group_563	BY21311_02741		hypothetical protein
group_564	BY21311_02742		hypothetical protein
vsr	BY21311_02743		Very short patch repair protein
group_566	BY21311_02762		hypothetical protein
group_567	BY21311_02764		hypothetical protein
traR_2	BY21311_02765		Protein TraR
group_569	BY21311_02766		hypothetical protein
group_570	BY21311_02767		hypothetical protein
group_571	BY21311_02768		hypothetical protein
group_572	BY21311_02769		hypothetical protein
group_573	BY21311_02770		hypothetical protein
group_574	BY21311_02771		IS30 family transposase ISCfr4
group_575	BY21311_02772		hypothetical protein
group_576	BY21311_02773		hypothetical protein
group_577	BY21311_02774		hypothetical protein
virB4	BY21311_02775		Type IV secretion system protein virB4
group_579	BY21311_02776		hypothetical protein
group_580	BY21311_02777		hypothetical protein
group_581	BY21311_02778		hypothetical protein
group_582	BY21311_02779		hypothetical protein
ptlE	BY21311_02780		Type IV secretion system protein PtlE
virB9	BY21311_02781		Type IV secretion system protein virB9
group_585	BY21311_02782		hypothetical protein
group_586	BY21311_02783		CpaF family protein [Pectobacterium]
group_587	BY21311_02784		hypothetical protein
group_588	BY21311_02785		hypothetical protein
group_589	BY21311_02786		hypothetical protein
group_590	BY21311_02787		hypothetical protein
group_591	BY21311_02788		hypothetical protein
group_592	BY21311_02789		ArdC-like ssDNA-binding domain-containing protein [Pectobacterium]
haeIIIM	BY21311_02790		Modification methylase HaeIII
group_594	BY21311_02791		hypothetical protein
group_595	BY21311_02792		hypothetical protein
group_596	BY21311_02793		hypothetical protein
group_597	BY21311_02794		hypothetical protein
group_598	BY21311_02795		hypothetical protein
group_599	BY21311_02796		hypothetical protein
group_600	BY21311_02826		hypothetical protein
group_601	BY21311_02827		ABC transporter substrate-binding protein [Pectobacterium]
group_602	BY21311_02828		dipeptide ABC transporter ATP-binding protein [Pectobacterium]
group_603	BY21311_02829		dipeptide ABC transporter ATP-binding protein [Pectobacterium]
group_604	BY21311_02830		putative peptidase
group_605	BY21311_02831		ABC transporter permease [Pectobacterium]
group_606	BY21311_02832		ABC transporter permease [Pectobacterium]
pepIP	BY21311_02833		Proline iminopeptidase
hpyO	BY21311_02834		FAD-dependent urate hydroxylase
group_609	BY21311_02835		LysR family transcriptional regulator [Pectobacterium]
group_610	BY21311_02836		hypothetical protein
group_611	BY21311_02837		hypothetical protein
group_612	BY21311_02838		hypothetical protein
group_613	BY21311_02978		hypothetical protein
group_614	BY21311_02979		hypothetical protein
group_615	BY21311_02980		hypothetical protein
group_616	BY21311_02981		hypothetical protein
group_617	BY21311_02982		hypothetical protein
group_618	BY21311_02983		hypothetical protein
group_619	BY21311_02984		hypothetical protein
group_620	BY21311_02985		hypothetical protein [Pectobacterium]
group_621	BY21311_02987		inovirus-type Gp2 protein [Pectobacterium]
group_622	BY21311_02988		hypothetical protein
group_623	BY21311_02990		hypothetical protein
group_624	BY21311_02991		hypothetical protein
group_625	BY21311_02992		hypothetical protein
group_626	BY21311_02993		hypothetical protein
crfC	BY21311_02998		Clamp-binding protein CrfC
group_628	BY21311_02999		hypothetical protein
group_629	BY21311_03000		hypothetical protein
group_630	BY21311_03082		hypothetical protein
group_631	BY21311_03083		hypothetical protein
group_632	BY21311_03118		hypothetical protein
group_633	BY21311_03144		hypothetical protein
group_634	BY21311_03296		hypothetical protein
group_635	BY21311_03302		hypothetical protein
group_636	BY21311_03310		hypothetical protein
group_637	BY21311_03312		hypothetical protein
group_638	BY21311_03314		hypothetical protein
group_639	BY21311_03318		hypothetical protein
group_640	BY21311_03346		hypothetical protein
group_641	BY21311_03347		hypothetical protein
ftsH2	BY21311_03348		ATP-dependent zinc metalloprotease FtsH 2
group_643	BY21311_03349		hypothetical protein
group_644	BY21311_03350		hypothetical protein
group_645	BY21311_03351		hypothetical protein
group_646	BY21311_03352		hypothetical protein
group_647	BY21311_03353		hypothetical protein
group_648	BY21311_03354		hypothetical protein
group_649	BY21311_03355		hypothetical protein
group_650	BY21311_03357		hypothetical protein
group_651	BY21311_03395		hypothetical protein
group_652	BY21311_03400		GTP cyclohydrolase II [Pectobacterium]
group_653	BY21311_03401		hypothetical protein
egtB	BY21311_03402		Hercynine oxygenase
group_655	BY21311_03403		hypothetical protein
group_656	BY21311_03404		hypothetical protein
group_657	BY21311_03405		hypothetical protein
group_658	BY21311_03502		hypothetical protein
group_659	BY21311_03524		hypothetical protein
group_660	BY21311_03564		hypothetical protein
group_314	BY21311_03579 BY21311_03580		hypothetical protein
group_661	BY21311_03581		hypothetical protein
group_662	BY21311_03630		IS630 family transposase [Pectobacterium]
group_663	BY21311_03631		IS630 family transposase [Pectobacterium]
group_664	BY21311_03632		LysR family transcriptional regulator [Pectobacterium]
group_665	BY21311_03633		hypothetical protein
group_666	BY21311_03634		hypothetical protein
group_667	BY21311_03709		hypothetical protein
group_668	BY21311_03790		hypothetical protein
group_669	BY21311_03845		sugar transporter [Pectobacterium]
group_670	BY21311_03846		Mono(2-hydroxyethyl) terephthalate hydrolase
group_671	BY21311_03960		hypothetical protein
group_672	BY21311_04049		ABC transporter permease [Pectobacterium]
group_673	BY21311_04050		ABC transporter permease [Pectobacterium]
group_674	BY21311_04051		ABC transporter ATP-binding protein [Pectobacterium]
nanC	BY21311_04064		putative N-acetylneuraminic acid outer membrane channel protein NanC
group_676	BY21311_04196		lipopolysaccharide 3-alpha-galactosyltransferase [Pectobacterium]
htrL	BY21311_04197		Protein HtrL
group_678	BY21311_04199		hypothetical protein
group_679	BY21311_04200		glycosyltransferase family 25 protein [Pectobacterium]
tadA	BY21311_04226		tRNA-specific adenosine deaminase
group_681	BY21311_04227		hypothetical protein
group_682	BY21311_04381		ABC transporter permease [Pectobacterium]
group_683	BY21311_04382		ABC transporter permease subunit [Pectobacterium]
group_684	BY21311_04383		arginine ABC transporter substrate-binding protein [Pectobacterium]

## Sheet: DPMP315 specific
Ortholog Group	BY21311	DPMP315T	Annotation
group_1000		DPMP315_03603	plasmid stabilization protein [Pectobacterium]
group_1001		DPMP315_03604	hypothetical protein [Pectobacterium]
group_1002		DPMP315_03605	entry exclusion protein 1 [Pectobacterium]
group_1003		DPMP315_03607	hypothetical protein [Pectobacterium]
group_1004		DPMP315_03609	ISAs1 family transposase ISAeme1
group_1005		DPMP315_03610	WbuC family cupin fold metalloprotein [Pectobacterium]
group_1006		DPMP315_03611	glycosyltransferase family 4 protein [Pectobacterium]
group_1007		DPMP315_03612	UDP-N-acetylglucosamine 2-epimerase (non-hydrolyzing) [Pectobacterium]
group_1008		DPMP315_03613	NAD-dependent epimerase/dehydratase family protein [Pectobacterium]
capD		DPMP315_03614	UDP-glucose 4-epimerase
group_1010		DPMP315_03730	AlpA family phage regulatory protein [Pectobacterium]
group_1011		DPMP315_03731	hypothetical protein
group_1012		DPMP315_03732	host cell division inhibitor Icd-like protein [Pectobacterium]
group_1013		DPMP315_03734	hypothetical protein
group_1014		DPMP315_03735	hypothetical protein
group_1015		DPMP315_03736	hypothetical protein [Pectobacterium]
group_1016		DPMP315_03737	CopG family ribbon-helix-helix protein [Pectobacteriaceae]
group_1017		DPMP315_03738	type II toxin-antitoxin system RelE/ParE family toxin [Pectobacterium]
group_1018		DPMP315_03739	hypothetical protein [Pectobacterium]
group_1019		DPMP315_03740	hypothetical protein [Pectobacterium]
group_1020		DPMP315_03820	hypothetical protein [Pectobacterium]
group_1021		DPMP315_03821	hypothetical protein [Pectobacterium]
group_1022		DPMP315_03822	Abi family protein [Pectobacterium]
group_1023		DPMP315_03823	hypothetical protein [Pectobacterium]
group_1024		DPMP315_03824	hypothetical protein [Pectobacterium]
group_1025		DPMP315_03826	hypothetical protein
group_1026		DPMP315_03827	hypothetical protein [Pectobacterium]
group_1027		DPMP315_03830	membrane lipoprotein lipid attachment site-containing protein [Pectobacterium]
group_1028		DPMP315_03831	hypothetical protein [Pectobacterium]
group_1029		DPMP315_03832	hypothetical protein
group_1030		DPMP315_03834	hypothetical protein [Pectobacterium]
group_1031		DPMP315_03837	hypothetical protein [Pectobacterium]
group_1032		DPMP315_03839	hypothetical protein
group_1033		DPMP315_03840	IS5 family transposase ISNeu3
group_1034		DPMP315_03841	hypothetical protein
group_1035		DPMP315_03843	hypothetical protein
group_1036		DPMP315_03988	helix-turn-helix domain-containing protein [Pectobacterium]
group_1037		DPMP315_03989	type II toxin-antitoxin system RelE/ParE family toxin [Pectobacterium]
group_1038		DPMP315_03990	helix-turn-helix domain-containing protein [Pectobacterium]
group_1039		DPMP315_03991	hypothetical protein [Pectobacterium]
group_1040		DPMP315_03992	hypothetical protein
group_1041		DPMP315_04021	hypothetical protein [Pectobacterium]
group_1042		DPMP315_04022	helix-turn-helix domain-containing protein [Pectobacterium]
group_1043		DPMP315_04023	type II toxin-antitoxin system RelE/ParE family toxin [Pectobacteriaceae]
group_1044		DPMP315_04028	hypothetical protein
group_1045		DPMP315_04029	DNA-binding transcriptional regulator [Pectobacterium]
group_1046		DPMP315_04030	hypothetical protein
group_1047		DPMP315_04031	hypothetical protein [Pectobacterium]
group_1048		DPMP315_04032	hypothetical protein
group_1049		DPMP315_04033	hypothetical protein
group_1050		DPMP315_04034	hypothetical protein [Pectobacterium]
group_1051		DPMP315_04035	hypothetical protein
group_1052		DPMP315_04119	NAD(P)-binding domain-containing protein [Pectobacterium]
group_1053		DPMP315_04172	glycosyltransferase family 25 protein [Pectobacterium]
group_1054		DPMP315_04175	IS3 family transposase IS3F
group_1055		DPMP315_04176	IS481 family transposase ISEc18
group_1056		DPMP315_04196	hypothetical protein
group_1057		DPMP315_04341	SDR family oxidoreductase [Pectobacterium]
group_1058		DPMP315_04342	helix-turn-helix transcriptional regulator [Pectobacterium]
group_1171		DPMP315_02052 DPMP315_03589	hypothetical protein [Pectobacterium]
group_15		DPMP315_01312 DPMP315_01308 DPMP315_02324 DPMP315_02321	hypothetical protein
group_1805		DPMP315_00464 DPMP315_01407	IS110 family transposase [Pectobacterium]
group_2130		DPMP315_02051 DPMP315_03590	baseplate J/gp47 family protein [Pectobacterium]
group_2289		DPMP315_02458 DPMP315_02661	IS110 family transposase [Pectobacterium]
group_2550		DPMP315_02267 DPMP315_03582	IS3 family transposase [Pectobacterium]
group_2594		DPMP315_00930 DPMP315_01775	IS200/IS605 family transposase [Pectobacterium]
group_2600		DPMP315_00752 DPMP315_03591	IS630 family transposase [Pectobacterium]
group_356		DPMP315_00556 DPMP315_00557	helix-turn-helix domain-containing protein [Pectobacterium]
group_357		DPMP315_00592 DPMP315_03572	hypothetical protein [Pectobacterium]
group_358		DPMP315_02053 DPMP315_03588	hypothetical protein [Pectobacterium]
group_359		DPMP315_02055 DPMP315_03586	hypothetical protein [Pectobacterium]
group_360		DPMP315_02056 DPMP315_03585	hypothetical protein [Pectobacterium]
group_361		DPMP315_02079 DPMP315_03565	phage holin family protein [Pectobacterium]
group_362		DPMP315_03231 DPMP315_03564	lysozyme [Pectobacterium]
group_363		DPMP315_03237 DPMP315_03569	recombination protein NinG [Pectobacterium]
group_364		DPMP315_03544 DPMP315_04024	hypothetical protein
group_365		DPMP315_03828 DPMP315_03836	hypothetical protein
group_685		DPMP315_00002	chromosome segregation protein ParM [Pectobacterium]
group_686		DPMP315_00003	hypothetical protein [Pectobacterium]
group_687		DPMP315_00004	hypothetical protein [Pectobacterium]
group_688		DPMP315_00006	antirestriction protein [Pectobacterium]
group_689		DPMP315_00009	hypothetical protein [Pectobacterium]
group_690		DPMP315_00010	hypothetical protein [Pectobacterium]
group_691		DPMP315_00020	hypothetical protein [Pectobacterium]
group_692		DPMP315_00021	hypothetical protein [Pectobacterium]
group_693		DPMP315_00022	UvrD-helicase domain-containing protein [Pectobacterium]
group_694		DPMP315_00034	TraI domain-containing protein [Pectobacterium]
group_695		DPMP315_00129	hypothetical protein [Pectobacterium]
group_696		DPMP315_00130	hypothetical protein [Pectobacterium]
group_697		DPMP315_00131	hypothetical protein
group_698		DPMP315_00132	Hcp family type VI secretion system effector [Pectobacterium]
group_699		DPMP315_00459	hypothetical protein
group_700		DPMP315_00470	hypothetical protein [Pectobacterium]
group_701		DPMP315_00471	hypothetical protein [Pectobacterium]
group_702		DPMP315_00472	hypothetical protein [Pectobacterium]
group_703		DPMP315_00511	MHS family MFS transporter [Pectobacterium]
group_704		DPMP315_00550	hypothetical protein
group_705		DPMP315_00560	hypothetical protein [Pectobacterium]
group_706		DPMP315_00563	ParB family protein [Pectobacterium]
group_707		DPMP315_00564	hypothetical protein [Pectobacterium]
group_708		DPMP315_00568	TIGR03761 family integrating conjugative element protein [Pectobacterium]
group_709		DPMP315_00572	hypothetical protein [Pectobacterium]
group_710		DPMP315_00573	hypothetical protein
group_711		DPMP315_00575	type IV pilus biogenesis protein PilM [Pectobacterium]
group_712		DPMP315_00576	PilN family type IVB pilus formation outer membrane protein [Pectobacterium]
group_713		DPMP315_00577	type 4b pilus protein PilO2 [Pectobacterium]
group_714		DPMP315_00578	type IV pilus biogenesis protein PilP [Pectobacterium]
group_715		DPMP315_00579	Flp pilus assembly complex ATPase component TadA [Pectobacterium]
group_716		DPMP315_00580	type II secretion system F family protein [Pectobacterium]
group_717		DPMP315_00581	pilus assembly protein PilX [Pectobacterium]
group_718		DPMP315_00583	prepilin peptidase [Pectobacterium]
group_719		DPMP315_00588	hypothetical protein
group_720		DPMP315_00589	hypothetical protein [Pectobacterium]
group_721		DPMP315_00593	hypothetical protein [Pectobacterium]
group_722		DPMP315_00596	integrating conjugative element protein [Pectobacterium]
group_723		DPMP315_00597	restriction endonuclease [Pectobacterium]
group_724		DPMP315_00600	hypothetical protein [Pectobacterium]
group_725		DPMP315_00601	hypothetical protein [Pectobacterium]
group_726		DPMP315_00603	TIGR03758 family integrating conjugative element protein [Pectobacterium]
group_727		DPMP315_00605	TIGR03750 family conjugal transfer protein [Pectobacterium]
group_728		DPMP315_00609	hypothetical protein [Pectobacterium]
group_729		DPMP315_00612	acetyltransferase [Pectobacterium]
group_730		DPMP315_00613	hsdR [Pectobacterium]
group_731		DPMP315_00614	TIGR03757 family integrating conjugative element protein [Pectobacterium]
group_732		DPMP315_00617	hypothetical protein [Pectobacterium]
group_733		DPMP315_00618	hypothetical protein
group_734		DPMP315_00619	hypothetical protein [Pectobacterium]
xerC		DPMP315_00620	Tyrosine recombinase XerC
group_736		DPMP315_00820	hypothetical protein
group_737		DPMP315_00903	hypothetical protein [Pectobacterium]
group_738		DPMP315_00944	hypothetical protein [Pectobacterium]
group_739		DPMP315_00976	tyrosine-type recombinase/integrase [Pectobacterium]
group_740		DPMP315_00977	excisionase [Pectobacterium]
group_741		DPMP315_00978	hypothetical protein [Pectobacterium]
group_742		DPMP315_00979	AAA family ATPase [Pectobacterium]
group_743		DPMP315_00980	exodeoxyribonuclease X [Pectobacterium]
group_744		DPMP315_00981	hypothetical protein
group_745		DPMP315_00982	hypothetical protein [Pectobacterium]
group_746		DPMP315_00983	hypothetical protein
group_747		DPMP315_00984	hypothetical protein
group_748		DPMP315_00985	hypothetical protein
group_749		DPMP315_00986	hypothetical protein [Pectobacterium]
group_750		DPMP315_00987	helix-turn-helix domain-containing protein [Pectobacterium]
group_751		DPMP315_00988	helix-turn-helix domain-containing protein [Pectobacterium]
group_752		DPMP315_00989	toxin YdaT family protein [Pectobacterium]
group_753		DPMP315_00990	hypothetical protein
group_754		DPMP315_00991	DnaT-like ssDNA-binding domain-containing protein [Pectobacterium]
group_755		DPMP315_00992	winged helix-turn-helix transcriptional regulator [Pectobacterium]
group_756		DPMP315_00993	hypothetical protein [Pectobacterium]
group_757		DPMP315_00994	ASCH domain-containing protein [Pectobacterium]
group_758		DPMP315_00995	class I SAM-dependent methyltransferase [Pectobacterium]
group_759		DPMP315_00996	hypothetical protein
group_760		DPMP315_01000	type II toxin-antitoxin system RelE/ParE family toxin [Pectobacterium]
group_761		DPMP315_01020	type II toxin-antitoxin system RelE/ParE family toxin [Pectobacterium]
group_762		DPMP315_01021	helix-turn-helix domain-containing protein [Pectobacterium]
group_763		DPMP315_01048	hypothetical protein
group_764		DPMP315_01049	hypothetical protein [Pectobacterium]
group_765		DPMP315_01050	hypothetical protein [Pectobacterium]
group_766		DPMP315_01092	hypothetical protein
group_767		DPMP315_01093	hypothetical protein
group_768		DPMP315_01146	hypothetical protein
group_769		DPMP315_01147	hypothetical protein [Pectobacterium]
group_770		DPMP315_01193	hypothetical protein
group_771		DPMP315_01194	IS110 family transposase [Pectobacterium]
group_772		DPMP315_01310	class I SAM-dependent methyltransferase [Pectobacterium]
group_773		DPMP315_01353	hypothetical protein [Pectobacterium]
group_774		DPMP315_01354	hypothetical protein
group_775		DPMP315_01355	hypothetical protein
group_776		DPMP315_01375	hypothetical protein [Pectobacterium]
group_777		DPMP315_01377	hypothetical protein [Pectobacterium]
group_778		DPMP315_01379	hypothetical protein [Pectobacterium]
group_779		DPMP315_01451	hypothetical protein
group_780		DPMP315_01492	hypothetical protein [Pectobacterium]
group_781		DPMP315_01531	hypothetical protein
group_782		DPMP315_01532	hypothetical protein
group_783		DPMP315_01533	hypothetical protein
mgtS		DPMP315_01679	Small protein MgtS
group_785		DPMP315_01791	autotransporter domain-containing protein [Pectobacterium]
group_786		DPMP315_01793	ClbS/DfsB family four-helix bundle protein [Pectobacterium]
group_787		DPMP315_01803	glutaredoxin-dependent arsenate reductase [Pectobacterium]
group_788		DPMP315_01804	arsenic transporter [Pectobacterium]
group_789		DPMP315_01805	metalloregulator ArsR/SmtB family transcription factor [Pectobacterium]
group_790		DPMP315_01806	hypothetical protein [Pectobacterium]
group_791		DPMP315_01808	bacteriocin immunity protein [Pectobacterium]
group_792		DPMP315_01822	hypothetical protein [Pectobacterium]
group_793		DPMP315_01860	helix-turn-helix domain-containing protein [Pectobacterium]
group_794		DPMP315_01861	type II toxin-antitoxin system RelE/ParE family toxin [Pectobacterium]
group_795		DPMP315_01983	PatB family C-S lyase [Pectobacterium]
group_796		DPMP315_02024	integrase arm-type DNA-binding domain-containing protein [Pectobacterium]
group_797		DPMP315_02025	LysR family transcriptional regulator [Pectobacterium]
group_798		DPMP315_02026	AlpA family transcriptional regulator [Pectobacterium]
group_799		DPMP315_02027	hypothetical protein
group_800		DPMP315_02028	type II toxin-antitoxin system HicA family toxin [Pectobacterium]
group_801		DPMP315_02029	ParB family protein [Pectobacterium]
group_802		DPMP315_02030	hypothetical protein
group_803		DPMP315_02031	STY4528 family pathogenicity island replication protein [Pectobacterium]
group_804		DPMP315_02032	TIGR03761 family integrating conjugative element protein [Pectobacterium]
group_805		DPMP315_02033	hypothetical protein
group_806		DPMP315_02034	single-stranded DNA-binding protein [Pectobacterium]
group_807		DPMP315_02035	DNA topoisomerase III [Pectobacterium]
group_808		DPMP315_02036	hypothetical protein
group_809		DPMP315_02037	hypothetical protein
group_810		DPMP315_02038	hypothetical protein
group_811		DPMP315_02039	hypothetical protein
group_812		DPMP315_02040	hypothetical protein [Pectobacterium]
group_813		DPMP315_02041	hypothetical protein
group_814		DPMP315_02042	DEAD/DEAH box helicase [Pectobacterium]
group_815		DPMP315_02043	hypothetical protein [Pectobacterium]
group_816		DPMP315_02044	hypothetical protein [Pectobacterium]
group_817		DPMP315_02045	hypothetical protein
group_818		DPMP315_02046	hypothetical protein
group_819		DPMP315_02047	hypothetical protein [Pectobacterium]
group_820		DPMP315_02048	hypothetical protein
group_821		DPMP315_02050	hypothetical protein
group_822		DPMP315_02054	hypothetical protein [Pectobacterium]
group_823		DPMP315_02057	hypothetical protein [Pectobacterium]
group_824		DPMP315_02058	hypothetical protein [Pectobacterium]
group_825		DPMP315_02059	ORF6N domain-containing protein [Pectobacterium]
group_826		DPMP315_02060	hypothetical protein [Pectobacterium]
group_827		DPMP315_02061	hypothetical protein [Pectobacterium]
group_828		DPMP315_02062	hypothetical protein
group_829		DPMP315_02063	hypothetical protein [Pectobacterium]
group_830		DPMP315_02064	hypothetical protein [Pectobacterium]
group_831		DPMP315_02065	hypothetical protein [Pectobacterium]
group_832		DPMP315_02066	hypothetical protein
group_833		DPMP315_02067	hypothetical protein [Pectobacterium]
group_834		DPMP315_02068	hypothetical protein
group_835		DPMP315_02069	hypothetical protein [Pectobacterium]
group_836		DPMP315_02070	hypothetical protein
group_837		DPMP315_02071	phage head morphogenesis protein [Pectobacterium]
group_838		DPMP315_02072	hypothetical protein
group_839		DPMP315_02073	phage terminase large subunit [Pectobacterium]
group_840		DPMP315_02074	terminase small subunit [Pectobacterium]
group_841		DPMP315_02075	hypothetical protein
group_842		DPMP315_02076	hypothetical protein [Pectobacterium]
group_843		DPMP315_02077	hypothetical protein [Pectobacterium]
group_844		DPMP315_02078	lysozyme [Pectobacterium]
group_845		DPMP315_02080	hypothetical protein [Pectobacterium]
group_846		DPMP315_02081	hypothetical protein [Pectobacterium]
group_847		DPMP315_02082	hypothetical protein [Pectobacterium]
group_848		DPMP315_02083	hypothetical protein
group_849		DPMP315_02084	hypothetical protein
group_850		DPMP315_02085	recombination protein NinG [Pectobacterium]
group_851		DPMP315_02086	phage N-6-adenine-methyltransferase [Pectobacterium]
group_852		DPMP315_02087	hypothetical protein
group_853		DPMP315_02088	hypothetical protein [Pectobacterium]
group_854		DPMP315_02089	hypothetical protein
group_855		DPMP315_02090	hypothetical protein [Pectobacterium]
group_856		DPMP315_02091	hypothetical protein [Pectobacterium]
group_857		DPMP315_02092	hypothetical protein
group_858		DPMP315_02093	replication protein [Pectobacterium]
group_859		DPMP315_02094	CII family transcriptional regulator [Pectobacterium]
group_860		DPMP315_02095	Cro/Cl family transcriptional regulator [Pectobacterium]
group_861		DPMP315_02096	LexA family transcriptional regulator [Pectobacterium]
group_862		DPMP315_02097	AAA family ATPase [Pectobacterium]
group_863		DPMP315_02098	hypothetical protein [Pectobacterium]
group_864		DPMP315_02099	hypothetical protein [Pectobacterium]
group_865		DPMP315_02100	hypothetical protein [Pectobacterium]
group_866		DPMP315_02101	hypothetical protein
group_867		DPMP315_02102	hypothetical protein
group_868		DPMP315_02103	ERF family protein [Pectobacterium]
group_869		DPMP315_02105	hypothetical protein [Pectobacterium]
group_870		DPMP315_02106	hypothetical protein
group_871		DPMP315_02107	hypothetical protein [Pectobacterium]
group_872		DPMP315_02108	hypothetical protein [Pectobacterium]
group_873		DPMP315_02109	hypothetical protein [Pectobacterium]
group_874		DPMP315_02110	hypothetical protein [Pectobacterium]
group_875		DPMP315_02111	hypothetical protein
group_876		DPMP315_02112	hypothetical protein [Pectobacterium]
group_877		DPMP315_02113	hypothetical protein [Pectobacterium]
group_878		DPMP315_02114	hypothetical protein [Pectobacterium]
group_879		DPMP315_02115	helix-turn-helix domain-containing protein [Pectobacterium]
group_880		DPMP315_02116	site-specific integrase [Pectobacterium]
group_881		DPMP315_02245	hypothetical protein
group_882		DPMP315_02250	hypothetical protein [Pectobacterium]
group_883		DPMP315_02253	hypothetical protein [Pectobacterium]
group_884		DPMP315_02265	tRNA(fMet)-specific endonuclease VapC [Pectobacterium]
group_885		DPMP315_02322	hypothetical protein
group_886		DPMP315_02323	IS110 family transposase ISKpn2
group_887		DPMP315_02504	Sec-independent protein translocase subunit TatA [Pectobacterium]
group_888		DPMP315_02505	alpha/beta hydrolase [Pectobacterium]
group_889		DPMP315_02506	hypothetical protein
group_890		DPMP315_02507	LysR family transcriptional regulator [Pectobacterium]
group_891		DPMP315_02508	heavy metal response regulator transcription factor [Pectobacterium]
group_892		DPMP315_02509	heavy metal sensor histidine kinase [Pectobacterium]
group_893		DPMP315_02510	hypothetical protein
group_894		DPMP315_02511	alpha/beta hydrolase [Pectobacterium carotovorum]
group_895		DPMP315_02512	flavodoxin [Pectobacterium]
group_896		DPMP315_02513	hypothetical protein
group_897		DPMP315_02514	hypothetical protein
group_898		DPMP315_02515	NAD(P)-dependent alcohol dehydrogenase [Pectobacterium]
group_899		DPMP315_02516	aldo/keto reductase [Pectobacterium]
group_900		DPMP315_02517	NAD(P)H-dependent oxidoreductase [Pectobacterium]
group_901		DPMP315_02518	NAD(P)H-dependent oxidoreductase [Pectobacterium]
group_902		DPMP315_02519	AraC family transcriptional regulator [Pectobacterium]
group_903		DPMP315_02520	hypothetical protein
group_904		DPMP315_02521	hypothetical protein
group_905		DPMP315_02522	hypothetical protein
group_906		DPMP315_02523	type VI secretion system tip protein VgrG [Pectobacterium]
group_907		DPMP315_02524	Hcp family type VI secretion system effector [Pectobacterium]
group_908		DPMP315_02609	nucleotidyl transferase AbiEii/AbiGii toxin family protein [Pectobacterium]
group_909		DPMP315_02610	type IV toxin-antitoxin system AbiEi family antitoxin domain-containing protein [Pectobacterium]
group_910		DPMP315_02687	hypothetical protein [Pectobacterium]
group_911		DPMP315_02688	hypothetical protein [Pectobacterium]
group_912		DPMP315_02703	hypothetical protein
group_913		DPMP315_02723	sel1 repeat family protein [Pectobacterium]
cutC		DPMP315_02784	Choline trimethylamine-lyase
group_915		DPMP315_02785	choline TMA-lyase-activating enzyme [Pectobacterium]
group_916		DPMP315_02786	multidrug efflux SMR transporter [Pectobacterium]
group_917		DPMP315_02787	multidrug efflux SMR transporter [Pectobacterium]
group_918		DPMP315_02804	RtcB family protein [Pectobacterium]
group_919		DPMP315_03104	ABC transporter permease [Pectobacterium]
group_920		DPMP315_03105	ABC transporter permease [Pectobacterium]
group_921		DPMP315_03106	ABC transporter ATP-binding protein [Pectobacterium]
group_922		DPMP315_03107	ABC transporter substrate-binding protein [Pectobacterium]
group_923		DPMP315_03108	hydantoinase B/oxoprolinase family protein [Pectobacterium]
group_924		DPMP315_03109	hydantoinase/oxoprolinase family protein [Pectobacterium]
group_925		DPMP315_03154	hypothetical protein [Pectobacterium]
[truncated: 74 more rows]
